# Supplementary material for: Combination of six enzymes of a marine Novosphingobium converts the stereoisomers of β-O-4 lignin model dimers into the respective monomers
Source: PubMed Central journal article supplement (PMC4609964; doi:10.1038/srep15105), 2015-10-19
Supplement: srep15105-s1.pdf [file srep15105-s1.pdf]

## **Supplementary information**

### **Combination of six enzymes of a marine *Novosphingobium* converts the stereoisomers of $\beta$ -O-4 lignin model dimers into the respective monomers**

Yukari Ohta\*, Shinro Nishi, Ryoichi Hasegawa, and Yuji Hatada

Correspondence: Y. Ohta, Japan Agency for Marine-Earth Science and Technology

(JAMSTEC), 2-15 Natsushima, Yokosuka, Kanagawa 237-0061, Japan.

E-mail: [ohtay@jamstec.go.jp](mailto:ohtay@jamstec.go.jp)

#### **Contents**

- I. Supplementary methods (page 2-14)
- II. Supplementary figures page (page 15-28)
- III. Supplementary tables (page 29-40)
- IV. Supplementary references (page 41-48)

## I. Supplementary methods

### Synthesis of $\beta$ -ether-linked model lignin dimers and associated metabolites

1-(4-Hydroxy-3-methoxyphenyl)-2-(2-methoxyphenoxy)-1,3-propanediol

- 5 (guaiacylglycerol- $\beta$ -guaiacyl ether; GGGE) and  
3-hydroxy-1-(4-hydroxy-3-methoxyphenyl)-2-(2-methoxyphenoxy)-1-propanone  
(2-(2-methoxyphenoxy)hydroxypropiovanillone; MPHPV) were synthesized according to the  
method of Hosoya *et al.* (45). Briefly, the synthesis was initiated by the bromination of  
commercially available acetovanillone (1-(4-hydroxy-3-methoxyphenyl)-1-ethanone) to  
10 produce 2-bromo-1-(4-hydroxy-3-methoxyphenyl)-1-ethanone. Keto aryl ether was formed  
via the displacement reaction of the bromine with the phenolate ion of guaiacol, affording  
1-(4-hydroxy-3-methoxyphenyl)-2-(2-methoxyphenoxy)-1-ethanone. An aldol reaction with  
formaldehyde was used to produce MPHPV, which was then reduced with NaBH<sub>4</sub> to obtain  
GGGE. 1-(3,4-Dimethoxyphenyl)-2-(2-methoxyphenoxy)-1,3-propanediol  
15 (veratrylglycerol- $\beta$ -guaiacyl ether; VGGE) and  
3-hydroxy-1-(3,4-dimethoxyphenyl)-2-(2-methoxyphenoxy)-1-propanone  
( $\beta$ -guaiacyl- $\alpha$ -veratrylglycerone; GVG) were synthesized by a similar scheme as used for  
GGGE with minor modifications according to the description of Picart *et al.* (24). Briefly,  
acetoveratrone (1-(3,4-dimethoxyphenyl)ethan-1-one) was first brominated to produce  
20 bromoacetoveratrone (2-bromo-1-(3,4-dimethoxyphenyl)ethan-1-one). Keto aryl ether was  
formed by the displacement of bromide with the phenolate ion of guaiacol, affording 1-  
(3,4-dimethoxyphenyl)-2-(2-methoxyphenoxy)ethan-1-one. An aldol reaction with  
formaldehyde was used to produce GVG, which was then reduced with NaBH<sub>4</sub> to obtain  
VGGE. The synthesized compounds were characterized and assigned using liquid  
25 chromatography/mass spectroscopy (LC/MS) and <sup>13</sup>C-NMR. LC/MS data were generated

using a Waters Xevo G2 quadrupole time-of-flight mass spectrometer operated in negative ion ESI mode. The inlet system was a Waters Acquity H-class UPLC system and was operated at a flow rate of 0.4 mL/min using a BEH C18 reverse phase column (1.8- $\mu$ m particle size, 100  $\times$  2.1 mm; Waters) using the mobile phase gradients A (2 mM sodium acetate and 0.05% formic acid) and B (95% acetonitrile/H<sub>2</sub>O) under the following conditions: from 0–6 min, 95%-5% A with B as the remainder; and from 6–7 min, 100% B. The eluate was monitored at 270 nm using a Waters photo diode array (PDA) e $\lambda$  detector. Data were acquired over the mass range of 100 to 1000 Da with a 0.45-s scan time using a desolvation temperature of 500  $^{\circ}$ C, source temperature of 150  $^{\circ}$ C and cone voltage of 30 V. Measured mono-isotopic mass (319.1 m/z) was consistent with the calculated masses (M-H<sup>+</sup> GGGE/ C<sub>17</sub>H<sub>19</sub>O<sub>6</sub>; 319.1, VGGE/ C<sub>18</sub>H<sub>21</sub>O<sub>6</sub>; 333.1) from the molecular formulas of each compound (GGGE/ C<sub>17</sub>H<sub>20</sub>O<sub>6</sub>; 320.1, VGGE/ C<sub>18</sub>H<sub>22</sub>O<sub>6</sub>; 334.1). <sup>13</sup>C NMR spectra of GGGE (Figure S7) and VGGE (Figure S8) were recorded on a Varian Inova 400- and 500-MHz spectrometer (Agilent Technologies, Santa Clara, CA, USA). Synthesized GGGE and VGGE had the following characteristic peaks:

[GGGE] <sup>13</sup>C-NMR (101 MHz, CDCl<sub>3</sub>)  $\delta$  [ppm] 151.4 (C3'); 147.7 (C4'); 146.7 (C3); 145.6, 145.1 (C4); 131.8, 131.5 (C1); 124.3, 124.2 (C1'); 121.7, 121.7 (C6'); 121.1, 121.0 (C6); 120.3, 119.1 (C5'); 114.3, 114.3 (C5); 112.2 (C2'); 109.5, 108.7, (C2); 89.6 (C $\beta$ -threo), 87.4 (C $\beta$ -erithro); 74.0(C $\alpha$ -threo), 72.8 (C $\alpha$ -erithro); 61.1(C $\gamma$ -threo), 60.8 (C $\gamma$ -erithro); and 56.0 / 55.9 (3'-OMe / 3-OMe).

[VGGE] <sup>13</sup>C-NMR (101 MHz, CDCl<sub>3</sub>)  $\delta$  [ppm] 151.5(C3'-erithro); 151.2(C3'-threo); 149.0(C3); 148.9(C4-threo); 148.4 (C4-erithro); 147.6 (C4'-threo); 146.8 (C4'-erithro); 132.5 (C1-erithro); 132.1 (C1-threo); 124.2, 124.1 (C1'); 121.7, 121.6 (C6'); 121.0 (C5'); 119.6 (C6-threo); 118.4 (C6-erithro); 112.1 (C2'); 111.0 (C5); 109.8 (C2-threo); 109.2 (C2-erithro); 89.4 (C $\beta$ -threo); 87.3 (C $\beta$ -erithro); 73.9 (C $\alpha$ -threo); 72.6 (C $\alpha$ -erithro); 61.0 (C $\gamma$ -threo); 60.7 (C $\gamma$ -erithro); and 55.9 (C-OMe).

Numbering of the atoms followed the scheme used in an earlier study (31). The  $^{13}\text{C}$ -NMR spectrum of synthetic GGGE (Figure S7) and VGGE (Figure S8) matched those deposited in the NMR Database of Lignin and Cell Wall Model Compounds

([http://ars.usda.gov/SP2UserFiles/Place/36553000/software/NMR/NMR\\_DB\\_11-2004.pdf](http://ars.usda.gov/SP2UserFiles/Place/36553000/software/NMR/NMR_DB_11-2004.pdf))

55 (46).

The ratios of stereoisomers in synthetic GGGE and MPHPV were determined by chiral chromatography based on the peak areas of the isomers. GGGE contained  $\alpha(S)\beta(R)$  GGGE,  $\alpha(R)\beta(S)$  GGGE,  $\alpha(S)\beta(S)$  GGGE, and  $\alpha(R)\beta(R)$  GGGE at a ratio of 1:1:3:3. MPHPV contained  $\beta(R)$  MPHPV and  $\beta(S)$  MPHPV at a ratio of 1:1 (Figure S9). The analytical

60 conditions are described below in the Chiral chromatography section.

For the structural analysis of the unidentified metabolite from GGGE, 3-hydroxy-1-(4-hydroxy-3-methoxyphenyl)-1-propanone (guaiacyl hydroxyl propanone; GHP) was chemically synthesized via an aldol reaction. For the synthesis, NaOH 9.6 g (0.24 mol) was dissolved in 850 mL water in a 1-l Erlenmeyer flask, to which 33.2 g (0.20 mol)

65 acetovanillone followed by 19.5 g (0.24 mol) 37% formalin were added. The resulting reaction mixture was incubated at 40 °C for 3.5 h. Aqueous HCl was used to adjust the pH of the reaction mixture to approximately 3, and the unreacted acetovanillone crystal deposit was then

removed by filtration. The filtrate was extracted twice with 300 mL ethyl acetate, which was then removed, yielding 9.3 g of crude product consisting of approximately 12% GHP. The

70 crude product was purified with silica gel (Wakogel C-200, Wako, Osaka, Japan) using ethyl acetate:toluene (1:4), followed by ethyl acetate:toluene (1:1). After removal of the solvent from the GHP-containing fractions, the obtained residue (1.6 g) was recrystallized from the ethyl acetate:toluene (1:1) to yield 0.8 g GHP with an HPLC purity of 99%. GHP was characterized by 2D COSY, HSQC, and HMBC. NMR spectra were recorded on a Varian Inova 500-MHz

75 spectrometer (Agilent Technologies). The NMR spectra had the following signals:  $^1\text{H}$ -NMR

(500 MHz, CDCl<sub>3</sub>)  $\delta$  [ppm]: 7.56-7.54 (m, 2H, H<sub>2</sub>/H<sub>6</sub>), 6.96 (d, 1H,  $J$  = 8.5 Hz, H<sub>5</sub>), 6.15 (s, 1H, phenol-OH), 4.04-4.01 (m, 2H, H $\gamma$ ), 3.96 (s, 3H, 3-OMe), 3.19 (t, 2H,  $J$  = 5.3 Hz, H $\beta$ ), and 2.74 (t, 1H,  $\gamma$ -OH) (Figure S10a); <sup>13</sup>C-NMR (126 MHz, CDCl<sub>3</sub>)  $\delta$  [ppm]: 199.1 (C $\alpha$ ); 150.8 (C<sub>4</sub>); 146.7 (C<sub>3</sub>), 129.7 (C<sub>1</sub>); 123.7 (C<sub>6</sub>); 113.9 (C<sub>5</sub>); 109.6 (C<sub>2</sub>); 58.3 (C $\gamma$ ); 56.1 (3-OMe), and 39.8 (C $\beta$ ) (Figure S10b).

**Strains and media.** *Novosphingobium* sp. strain MBES04 (NITE AP-01797) was grown aerobically with shaking at 30 °C in a basal medium consisting of Luria-Bertani (LB) medium supplemented with 5 mM MgSO<sub>4</sub>. For testing carbon utilization, a defined mineral medium containing 1 mM of the test substrate as the sole carbon source was used. The mineral medium (100 mL) consisted of basal salt solution (33.9 g Na<sub>2</sub>HPO<sub>4</sub>, 15.0 g KH<sub>2</sub>PO<sub>4</sub>, 10.0 g NaCl, and 5.0 g NH<sub>4</sub>Cl per liter of deionized H<sub>2</sub>O), 0.5 mL 1 M MgSO<sub>4</sub>, 1 mL of 0.25% (w/v) of Daigo's IMK medium (Wako), 1 mL trace vitamins solution, 1 mL of 100 mM substrate stock solution, and 86.5 mL deionized H<sub>2</sub>O. The trace vitamin solution was prepared according to Balch *et al.* (51). Prior to use, the medium was sterilized using a 0.22- $\mu$ m membrane filter. Substrate stock solutions of 100 mM GGGE, MPHPV, synaptic acid, ferulic acid, caffeic acid, 4-hydroxybenzoic acid, syringic acid, vanillic acid, vanillin, protocatechuic acid, and chlorogenic acid were prepared using N,N-dimethylformamide (DMF) as a solvent. Stock solutions of 100 mM sodium benzoate arabinose and xylose were prepared in deionized H<sub>2</sub>O. Mineral medium containing 1 mM glucose with/without 1% (v/v) DMF was used as a positive control for growth. The growth of strain MBES04 was not affected by supplementation of the medium with 1% (v/v) DMF.

**Metabolism of a crude extract from milled wood.** *Quercus myrsinifolia* sawdust was milled at 25,000 rpm for 2 min using a Wander blender (D3V-10, Osaka Chemical, Osaka,

Japan). The coarse grain was removed by passing the material through a 0.1-mm mesh sieve. A total of 10 g milled wood grain was immersed in 1 L dioxian-water (96:4) for 2 days at room temperature. The extract was recovered by filtration and dried under vacuum to obtain a crude lignin-rich material, which was then suspended in water at 0.4% (w/v) and autoclaved at 105 120 °C for 15 min. The suspension was filtered through a 0.22- $\mu$ m membrane to obtain the water-soluble fraction, which was designated as WDM (water-soluble fraction of dioxan extract from milled wood). A quarter volume of WDM was added to basal medium as a low-molecular-weight lignin containing crude natural materials. Strain MBES04 was cultured using 10 mL WDM-supplied medium in triplicate. After 48-h cultivation, the culture broth was 110 centrifuged at  $10,500 \times g$  for 10 min to remove all cells and debris, and the obtained supernatant was analyzed by LC/MS. Control experiments were performed in triplicate using basal medium containing WDM without inoculation of strain MBES04 (control 1), and using basal medium without WDM, but with inoculation of the strain (control 2). All LC/MS loading data were analyzed with multivariate statistics using MarkerLynks XS software (Waters). An 115 OPLS-discriminant model was constructed and visualized in an S-plot to detect differences between the data obtained from the WDM-supplemented culture medium and those from the control experiments. Ten MS ions with high loadings ( $>0.05$ ) and correlations ( $>0.9$ ) were selected as possible metabolites from WDM and were used for quantification based on the peak area in the MS chromatograms. Metabolites were identified by comparing the retention 120 times and MS spectral patterns with those of GHP and SHP standards. Authentic SHP was purchased from Tokyo Fine Chemicals (Tokyo, Japan).

**Assessment of oxidase and peroxidase activities of strain MBES04.** The supernatant of 48-h cultures of strain MBES04 grown in WDM-supplemented basal medium 125 was used for the assessment of oxidase and peroxidase activities of the strain. Oxidase activity

was assayed according to the method described in the literature for laccase (48) with minor modifications. Briefly, 0.5 mM 2,2'-azino-bis(3-ethylbenzothiazoline-6-sulphonic acid) (ABTS) and 1 mM 2,6-dimethoxyphenol (DMP) were used as substrates in reaction mixtures with and without 0.5 mM each of the divalent metal salts of FeSO<sub>4</sub>, CuSO<sub>4</sub>, and MnSO<sub>4</sub>. After adding 40 μL of the culture supernatants to the assay mixtures to make a total volume of 200 μL, increases in absorbance at 420 and 480 nm for the ABTS and DMP assays, respectively, were monitored every hour for 4 h with a Powerscan HT microplate reader (Dainippon Pharmaceutical) at 25 °C. Peroxidase activity was assayed in the presence of 0.1 mM H<sub>2</sub>O<sub>2</sub> using the same substrates and metal ions for the oxidase assays. Uninoculated medium incubated under the same conditions as the test cultures was used as a control for abiotic-induced changes in the absorbance.

**Preparation of expression plasmids and enzyme purification.** The whole-genome shotgun sequence of strain MBES04 was previously determined by our group (28). A total of 124 contigs were deposited at DDBJ/EMBL/GenBank under the accession numbers BBNP01000001 to BBNP01000124. Candidate GGGE-metabolizing genes of strain MBES04 were identified by querying all detected ORFs in the MBES04 draft genome with known GGGE-metabolizing genes of *Sphingobium* sp. SYK-6 (accession numbers NC\_015976/ Gene ID; BAK65539, BAK65541, BAK65540, BAK65542, BAK68041, BAK68265, BAK68263, and BAK67935) using BLASTP with the following thresholds: coverage >60%, identity >25%, and similarity >50% (56). DNA fragments containing possible genes encoding GGGE-metabolizing enzymes and the expression vector pRSET A (Life Technologies, Carlsbad, CA, USA), which was used to add a His × 6 tag at the N-terminus of the target protein, were amplified by polymerase chain reaction (PCR) using PrimeSTAR GXL DNA polymerase (Takara Bio, Ohtsu, Japan) and the primer sets listed in Table S1. The amplicons

of each ORF and the vector were ligated and cloned into competent *E. coli* strain

BL21(DE3)pLysE cells using an In-Fusion HD Cloning Kit (Takara Bio) according to the supplier's instructions. The constructed plasmids were extracted and purified from cells using a High Pure Plasmid Isolation Kit (Roche Diagnostics, Basel, Switzerland). The nucleotide  
155 sequences of inserted genes in the plasmid constructs were confirmed using an ABI 3730 XL DNA sequencer (Applied Biosystems, Foster City, CA, USA).

Transformant cultures of *E. coli* strain BL21(DE3)pLysE were grown aerobically overnight with shaking at 37 °C in LB medium and were then subcultured (1:100) into 400 mL LB medium supplemented with 100 µg/mL ampicillin. After 3-h incubation at 16 °C with shaking,  
160 0.5 mM isopropyl β-D-1-thiogalactopyranoside was added to induce protein expression, and the cultures were further incubated overnight at 16 °C and then harvested by centrifugation at 10,500 × *g*. Pelleted cells were resuspended in ~20 mL TN buffer (50 mM Tris-HCl and 500 mM NaCl, pH 7.5) and were then disrupted by sonication. After the removal of cell debris by centrifugation at 10,500 × *g*, cell lysates were loaded onto a laboratory-packed column  
165 containing 10 mL of cOmplete His-tag Purification Resin (Roche Diagnostics). The packed column was washed with 100 mL of 40 mM imidazole in TN buffer, and His-tagged proteins were then eluted with 20 mL of 500 mM imidazole in TN buffer. Collected fractions were desalted by repeated concentration and dilution at 4 °C using a 10,000 molecular weight cut-off centrifugal concentrator (Amicon Ultra-15 Centrifugal Filter Unit; Merck Millipore AG,  
170 Zug, Switzerland). The purity of protein preparations was confirmed by SDS-15% PAGE (Figure S2). Protein concentrations were determined using a Protein Assay Kit (Bio-Rad, Hercules, CA, USA).

**Analysis of GGGE metabolism.** Strain MBES04 was grown aerobically overnight with  
175 shaking at 30 °C in basal medium and was then subcultured (1:100) into 150 mL of basal



medium supplemented with 0.9 mM GGGE. The cultures were further incubated for 5 days at 30 °C with shaking, and culture supernatants were periodically collected by centrifugation at 10,500 × g for 5 min. A 0.1-mL aliquot of each supernatant sample was mixed with 0.9 mL methanol and then centrifuged at 10,500 × g for 5 min. The resulting supernatant was collected and analyzed using an Alliance 2796 Liquid Chromatography (LC) system (Waters) equipped with an Xbridge C18 reversed-phase column (3.5- $\mu$ m particle size, 100 × 4.6 mm; Waters) operated at a flow rate of 1.2 mL/min using the mobile phase gradients A (2 mM sodium acetate and 0.05% formic acid) and C (95% methanol/H<sub>2</sub>O) under the following conditions: 0–1 min, 90% A and 10% C, 1–8 min, a decreasing gradient of 90%–10% A with C as the remainder, followed by 8–10 min 100% C. The eluate was monitored at 270 nm using a Waters 2998 PDA detector. The amounts of substrate and metabolites in the culture supernatant samples were calculated based on the area of the corresponding chromatographic peaks. Uninoculated medium incubated under the same conditions as the test cultures was used as a blank sample to assess the effect of the abiotic degradation of GGGE.

190

#### **Preparation and structural characterization of metabolites produced by strain**

**MBES04.** The intermediate compound transiently produced by strain MBES04 was determined to be MPHPV based on molecular mass and retention time ( $t_R$ ) on LC/MS analysis using synthetic MPHPV as a reference. One of the two major end metabolites was identified to be guaiacol by comparison of the  $t_R$  value in reversed-phase column chromatography to that of the authentic compound.

To confirm the structure of the other major metabolite, which had a mass of 195.1 m/z (M-H<sup>+</sup>), the metabolite was purified by the following procedure. GGGE (288 mg, 3 mM final concentration) was added to a medium composed of 6 g Daigo artificial seawater (Wako), 0.9 g Difco tryptone peptone, 0.9 g Bacto yeast extract, and 300 mL tap water. The prepared medium

200

was inoculated with strain MBES04 and was then incubated at 30 °C for 150 h with shaking at 120 rpm. The culture supernatant was collected by centrifugation, adjusted to approximately pH 3 with 10% aqueous HCl, and GHP was then extracted three times with 100 mL ethyl acetate. The ethyl acetate extract was concentrated under reduced pressure to obtain 0.5 g of  
205 crude metabolite, which was then purified by silica gel (Wakogel C-200) column chromatography (110 × 21 mm) using ethyl acetate:toluene (1:1) as the eluent. The solvent was removed to yield a total of 140 mg crystals.

The purified metabolites recovered from the culture supernatant and chemically synthesized GHP were analyzed by LC/MS as described above, <sup>1</sup>H-NMR at 500 MHz in CDCl<sub>3</sub> and  
210 <sup>13</sup>C-NMR at 126 MHz in CDCl<sub>3</sub>. Both compounds had identical *t<sub>R</sub>* (2.3 min) values and had masses of 195.1 m/z. The GHP recovered and purified from the culture supernatant had the following characteristics: <sup>1</sup>H-NMR (500 MHz, CDCl<sub>3</sub>) δ [ppm]: 7.56-7.54 (m, 2H, H2/H6), 6.96 (d, 1H, *J* = 8.5 Hz, H5), 6.12 (s, 1H, phenol-OH), 4.02 (t, 2H, *J* = 5.5 Hz, Hγ), 3.96 (s, 3H, 3-OMe), 3.19 (t, 2H, *J* = 5.3 Hz, Hβ), and 2.6-2.9 (s, 1H, γ-OH) (Figure S11a). <sup>13</sup>C-NMR (126  
215 MHz, CDCl<sub>3</sub>) δ [ppm]: 199.1 (Cα); 150.8 (C4); 146.7 (C3); 129.7 (C1); 123.7 (C6); 113.9 (C5); 109.5 (C2); 58.3 (Cγ); 56.1 (3-OMe); and 39.8 (Cβ) (Figure S11b).

**SDRs and GSTs reactions of lignin model dimers.** The enzymatic conversions of four mixed stereoisomers of GGGE (1.0 mM) were performed with the recombinant enzymes  
220 SDR3 (encoded by GAM05523, 10.0 μg/mL) or SDR5 (encoded by GAM05547, 5.0 μg/mL) with NAD sodium salt (2.0 mM) as a cofactor for 16 h at 15 or 25 °C, respectively. The enzymatic conversion of two mixed stereoisomers of MPHPV (1.0 mM) was conducted with one or two enzymes selected from GST3 (encoded by GAM05529, 5.0 μg/mL), GST4 (encoded by GAM05530, 5.0 μg/mL), GST5 (encoded by GAM05531, 50.0 μg/mL) and GST6

225 (encoded by GAM05532, 5.0  $\mu\text{g}/\text{mL}$ ) with glutathione (2.0 mM) as a cosubstrate for 16 h at  
25 °C.

**Biochemical characterization and kinetics of SDRs and GSTs.** SDR3 and SDR5  
were characterized using 10 mM GGGE as a substrate and 20 mM NAD sodium salt as a  
230 cofactor. The formation of the reaction product, MPHPV, after 30-min incubation was  
determined by HPLC as described above. GST4 and GST5 were characterized using 5 mM  
MPHPV as a substrate and 10 mM GSH as a cofactor. The formation of the reaction product,  
guaiacol, was measured by HPLC. The determination of the pH optimum for enzymatic  
activity was performed using the following buffers (100 mM): 2-(N-morpholino)  
235 ethanesulfonic acid (pH 5.5 to 7.0), 3-morpholinopropanesulfonic acid (pH 7.0 to 8.0),  
N-Tris(hydroxymethyl)methyl-3-aminopropanesulfonic acid (pH 8.0 to 9.0),  
N-cyclohexyl-2-aminoethanesulfonic acid (pH 9.0 to 10.0), and  
N-cyclohexyl-3-aminopropanesulfonic acid (pH 10.0 to 11.0). The optimal temperature was  
determined by measuring the formation of each reaction product after a 30-min incubation at  
240 the optimal pH for each enzyme at temperature ranges of 5-45 °C for SDR3 and SDR5, and  
15-45 °C for GST4 and GST5. All experiments were performed in triplicate.

Kinetic measurements were conducted for 30 min with the substrates (final concentrations)  
GGGE and VGGE (0.06 to 5.0 mM), MPHPV (0.06 to 2.5 mM), and GVG (0.06 to 1.5 mM).  
The highest concentration of each substrate was determined according to the maximum  
245 solubility of each compound in the tested reaction mixture. The formation of MPHPV from  
GGGE by SDR3/SDR5, GVG from VGGE by SDR3/SDR5, and guaiacol from MPHPV and  
GVG by GST3/GST5 were measured by HPLC. The kinetic experiments were performed in  
triplicate. The apparent  $K_m$  and  $V_{max}$  values were calculated from a hyperbolic regression  
analysis using Hyper32 software (version 1.0.0.; <http://homepage.ntlworld.com/john.easterby>).

250 GST activities (10  $\mu$ g GST3, GST4, GST5, and GST6) toward the commercially available substrates phenethyl isothiocyanate, 1-chloro-2,4-dinitrobenzene and 4-nitrophenyl butyrate were assessed according the method described by Mathieu *et al.* (36).

1,2-Dichloro-4-dinitrobenzene, ethacrynic acid and 4-nitrobenzyl chloride were also used as substrates (37).

255

**Chiral chromatography.** The enzymatic reaction mixtures prepared above were loaded onto a Waters Oasis WAX Solid Extraction Cartridge Column and eluted with 60% acetonitrile.

The recovered fractions were diluted 3 fold with H<sub>2</sub>O to prepare 20% acetonitrile solutions, which were then injected into a CHIRALPAK IE-3 column (4.6  $\times$  250 mm; Daicel Chemical

260 Industries) for separation of the stereoisomers  $\alpha(S)\beta(R)$  GGGE,  $\alpha(R)\beta(S)$  GGGE,  $\alpha(S)\beta(S)$  GGGE,  $\alpha(R)\beta(R)$  GGGE,  $\beta(R)$ MPHPV, and  $\beta(S)$  MPHPV. A mixture of acetonitrile and H<sub>2</sub>O was used as the mobile phase at a flow rate of 1.0 mL/min. The acetonitrile concentration of the mobile phase was adjusted as follows (the remainder was H<sub>2</sub>O): 0–10 min, 20% acetonitrile; 10–15 min, gradient from 20% to 30% acetonitrile; and 15–30 min, 30%

265 acetonitrile. The absorbance of the eluate was monitored at 270 nm using a Waters 2998 PDA detector. The  $t_R$  of  $\alpha(S)\beta(R)$  GGGE,  $\alpha(R)\beta(S)$  GGGE,  $\alpha(S)\beta(S)$  GGGE,  $\alpha(R)\beta(R)$  GGGE,  $\beta(R)$ MPHPV, and  $\beta(S)$  MPHPV are shown in Figure S9. Peak identification was based on optical rotation, as described by Hishiyama *et al.* (49).

270 **RNA isolation and purification.** Strain MBES04 was grown aerobically overnight with shaking at 30 °C in basal medium and was then subcultured (1:100) into 100 mL basal medium supplemented with 1 mM GGGE or MPHPV and further incubated at 30 °C for 6 h. Cells cultured in basal medium without GGGE and MPHPV were used as controls. Cells were collected by centrifugation at 10,500  $\times$  g for 5 min at 4 °C. RNA was isolated and purified

275 from the pelleted cells using an RNeasy kit (Qiagen, Valencia, CA, USA) following the  
manufacturer's manual. Total RNA was eluted in 100  $\mu$ L RNase-free H<sub>2</sub>O, and DNase I  
digestion of genomic DNA was then performed on a column using RNase-free DNase I  
(Qiagen) according to the manufacturer's protocol. The sample was then subjected to a second  
RNeasy purification step. RNA quality in the purified solutions was verified by quantification  
280 of the A260/A280 and A260/A230 ratios using an e-Spect spectrophotometer (Malcom, Tokyo,  
Japan) and by electrophoresis on an Agilent Bioanalyzer to detect intact 16S and 23S rRNAs.

**Quantitative PCR (qPCR).** Four  $\mu$ g of total RNA was reverse transcribed using the  
Transcriptor First Strand cDNA Synthesis Kit (Roche Diagnostics) in a total volume of 40  $\mu$ L.  
285 The reaction was diluted 1:20 using water and 5  $\mu$ L were used in the subsequent qPCR  
reaction performed with Light Cycler 480 SYBR Green Master Mix (Roche Diagnostics) in a  
Roche Light Cycler 480. The 16S rRNA gene was used as a reference. The primers used for  
qPCR are listed in Table S5. All qPCR experiments were performed independently in  
duplicate.

290

**RNA sequencing and data analysis.** RNA sequencing was conducted using a previously  
described method (50). Briefly, RNA samples were treated with DNase I (Promega, Madison,  
WI, USA) at a concentration of 1 U/ $\mu$ g of total RNA. rRNA was removed using a Ribo-Zero  
rRNA Removal Kit (Gram-Negative Bacteria) (Epicentre Biotechnologies, Madison, WI,  
295 USA). Following purification, the mRNA was fragmented into small pieces (200-700 nt) using  
fragmentation buffer. The cleaved RNA fragments were used for first strand cDNA synthesis  
using reverse transcriptase and random primers. This synthesis reaction was followed by  
second strand cDNA synthesis using DNA polymerase I and RNase H. The generated cDNA  
fragments were purified using a QiaQuick PCR Extraction Kit (Qiagen), treated using an end

300 repair process, and then ligated to adapters. The obtained products were purified, and  
fragments with an approximate size of 200 bp were selected by agarose gel-electrophoresis.  
Sequencing libraries were constructed by amplifying the selected fragments by PCR. The  
quality of the sequencing libraries was assessed using an Agilent Bioanalyzer and ABI Step  
One Plus Real-Time PCR (Applied Biosystems). The constructed sequencing libraries were  
305 sequenced using an Illumina Hiseq 2000 platform at the Beijing Genome Institute (BGI,  
Shenzhen, China).

RNAseq data analysis was performed by mapping the obtained reads to the strain MBES04  
draft genome using the short-read aligner Bowtie (<http://bowtie-bio.sourceforge.net>) (51), with  
two mismatches being allowed per read alignment.

310 Differentially expressed genes from mapped RNA-Seq reads of strain MBES04 cultured in  
medium supplemented with and without lignin model dimer (1 mM GGGE or 1 mM MPHPV)  
were statistically identified using the method of the Bioconductor project (52), which included  
iDEGES for accurate normalization of tag count data (53) and edgeR for examining  
differential expression of replicated count data (54). Significance was calculated using  
315 dispersion values estimated from the two samples, as no replicate was available, and was  
defined as a P-value of  $< 0.05$  in a negative binomial test following correction for false  
discovery rate (55). The pathways involved in the physiological response to lignin model  
dimers were inferred using the KEGG Automatic Annotation Server with manual curation  
(56).

## II. Supplementary figures

Figure S1. Detection of metabolites in the crude extract of milled wood

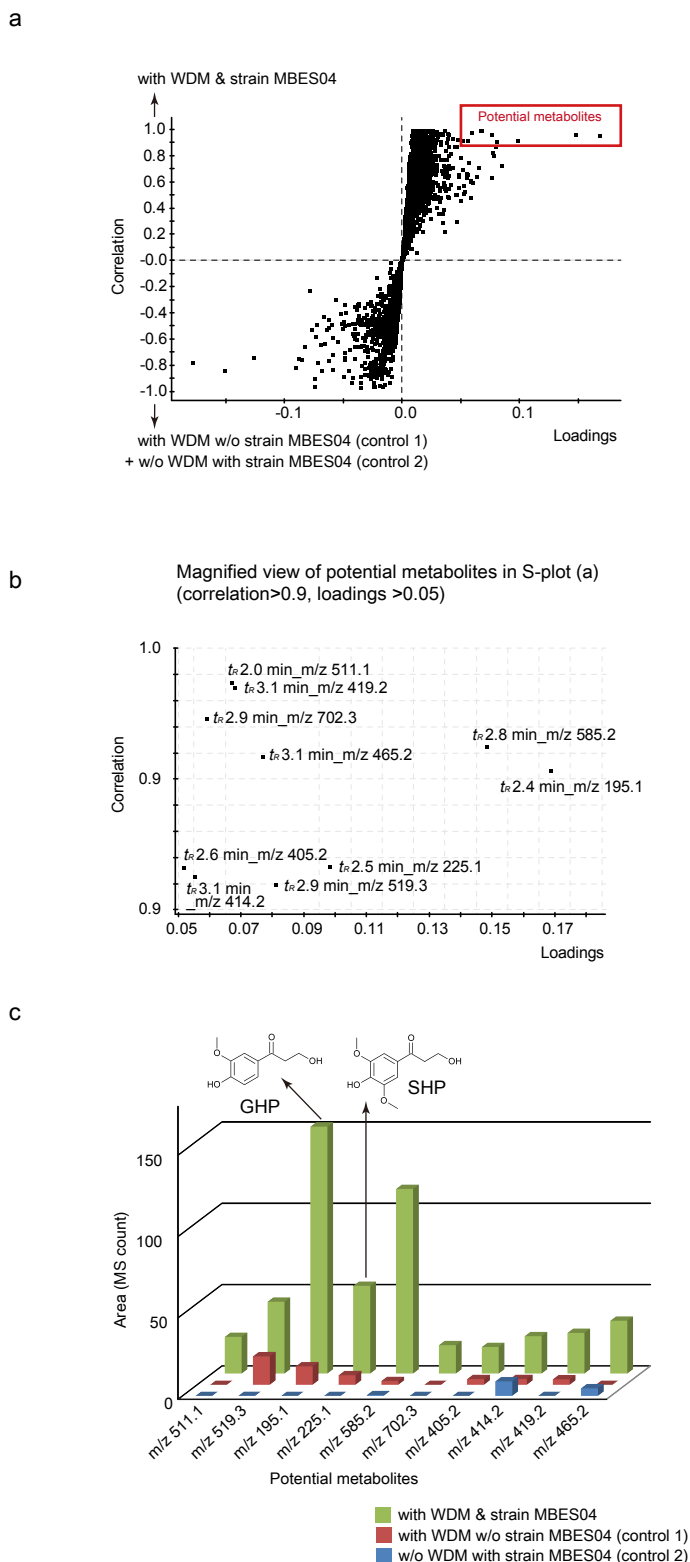

The water-soluble fraction of a dioxan extract from milled wood, *Quercus myrsinifolia* (WDM), was used for cultivation of strain MBES04. After 48-h cultivation, the supernatant of the culture broth was analyzed by LC/MS. Control experiments conducted using WDM-supplemented medium without inoculation of strain MBES04 (control 1), and uninoculated medium without WDM (control 2) were performed in triplicate. All LC/MS loading data were analyzed using multivariate statistics. An OPLS-discriminant model was constructed and visualized in an S-plot (a) to detect differences between the data obtained from the WDM-supplemented culture media and those from the control experiments described above. Ten MS ions (b) with high loadings (>0.05) and correlations (>0.9) were selected as possible metabolites from WDM and used for quantification based on the peak area in the MS chromatograms (c). Metabolites were identified by comparing the retention times and MS spectra with those of authentic GHP and SHP.

Figure S2, SDS-PAGE of purified SDR (a) and GST (b) recombinant enzymes.

(a)

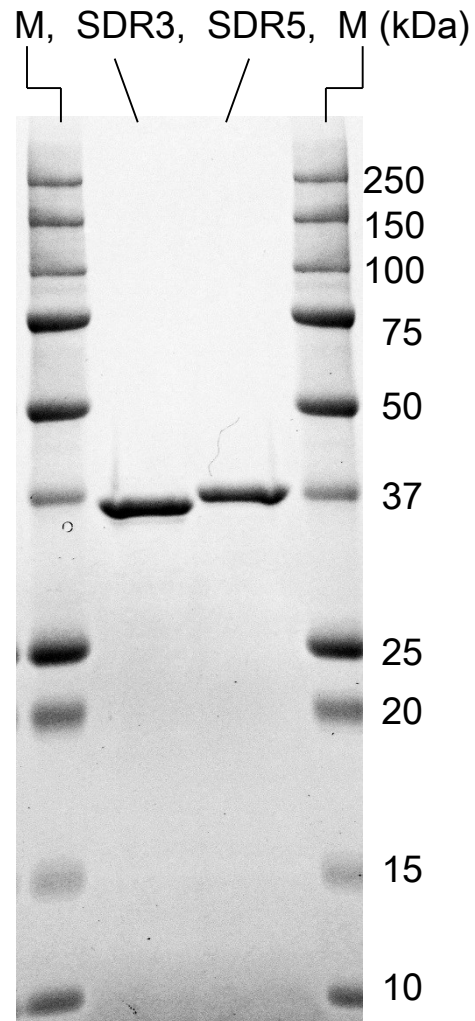

(b)

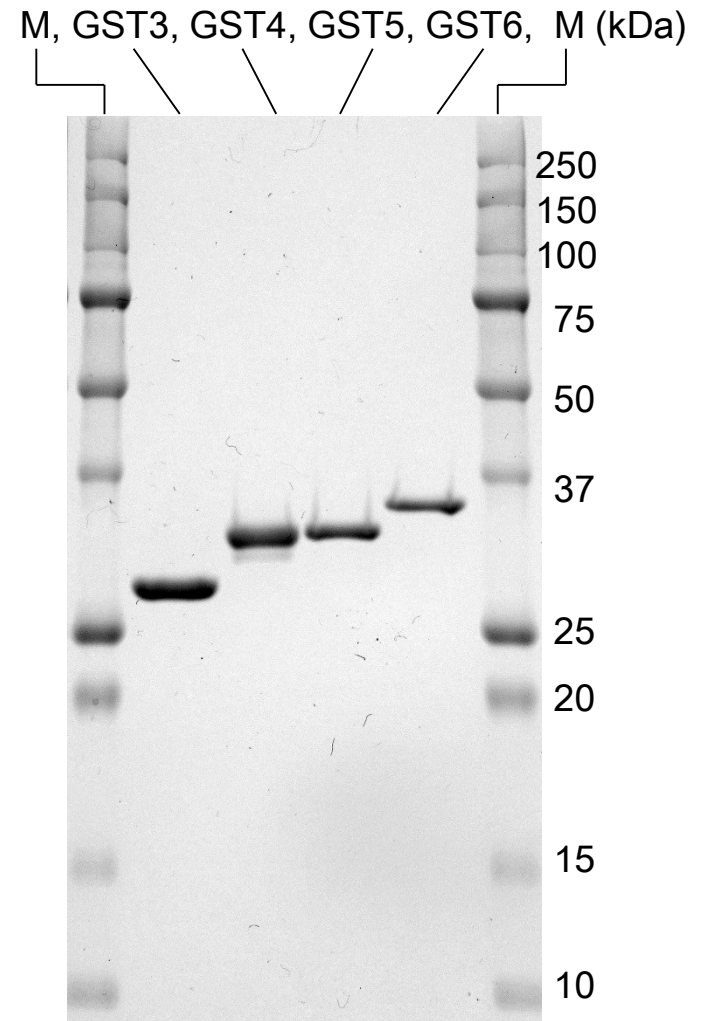



Figure S3. Determination of the pH and temperature dependences of SDR and GST activities and kinetics with varying substrate concentrations.

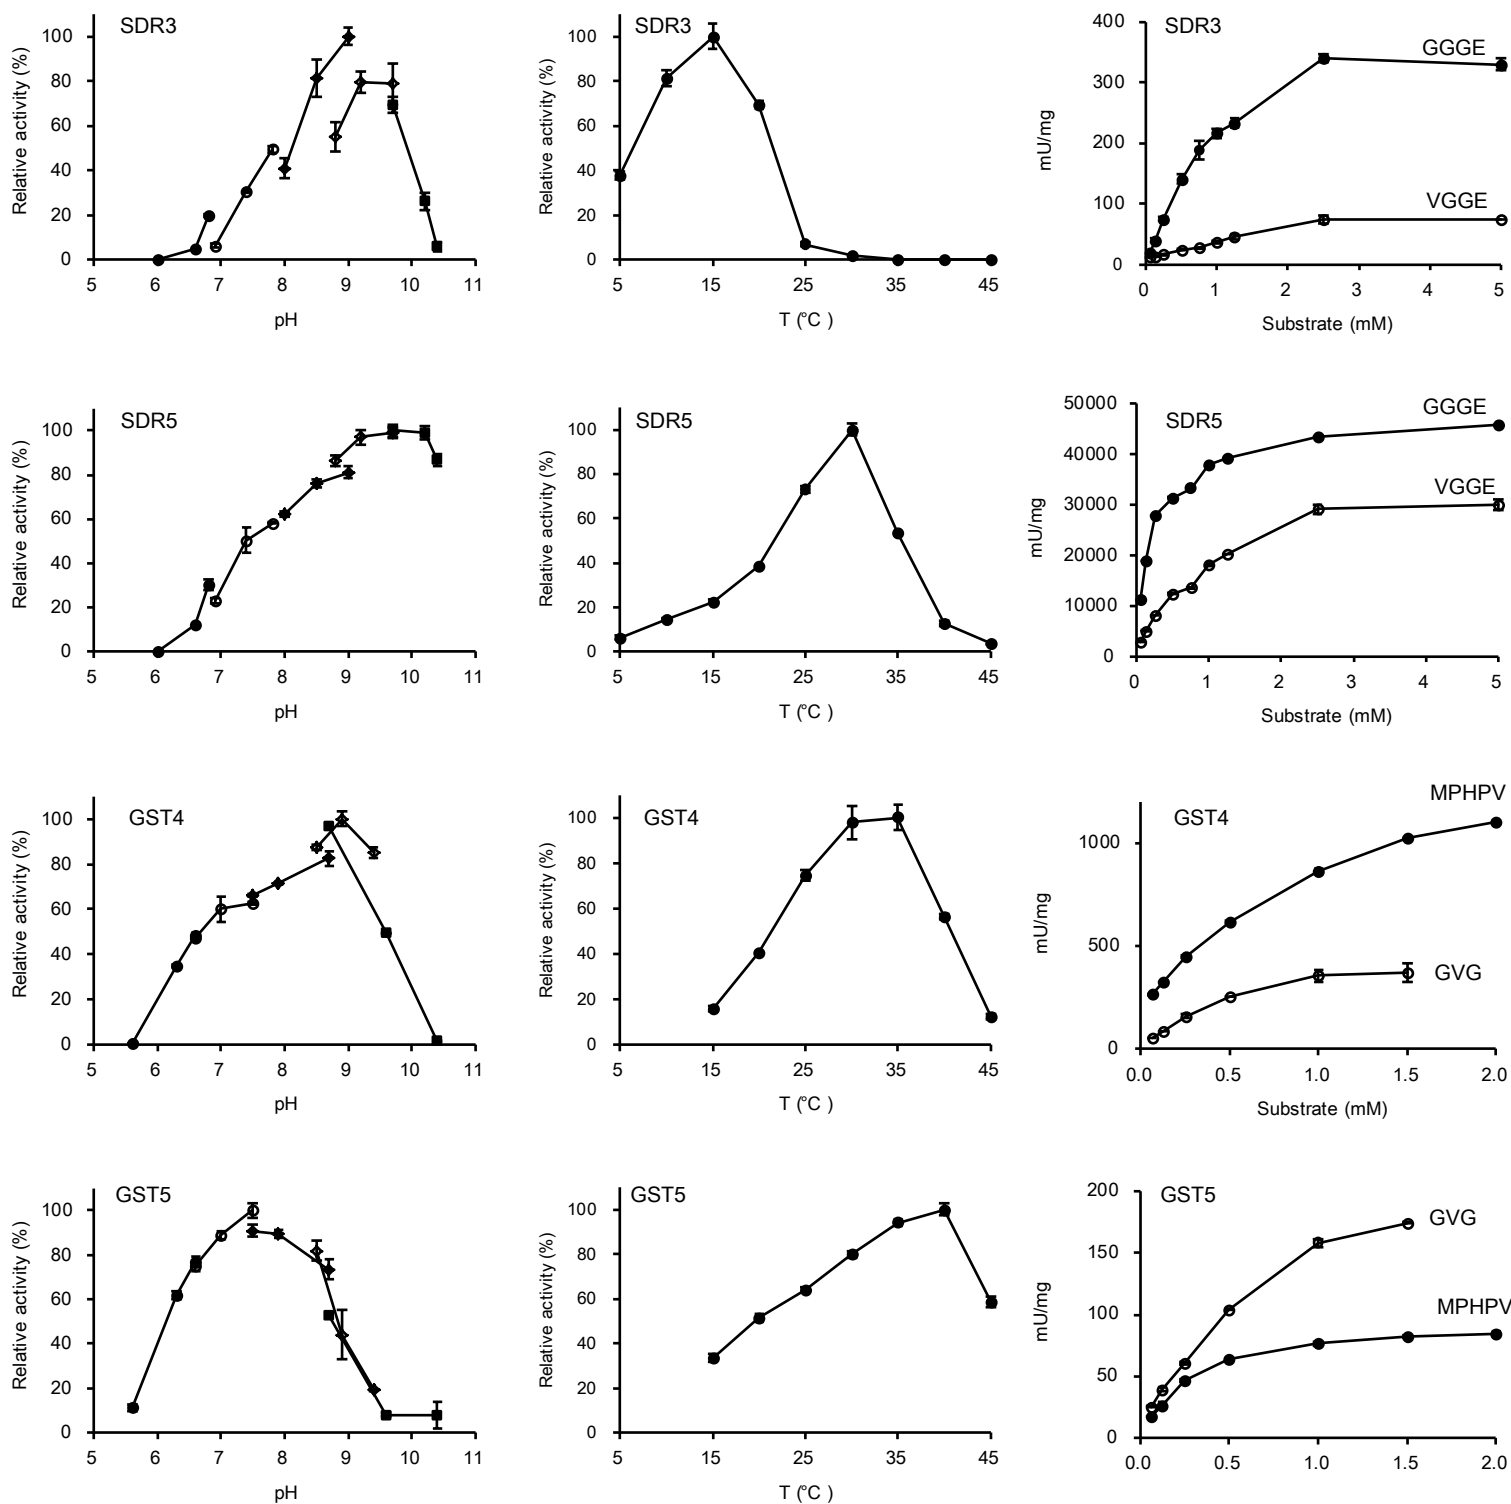

pH and temperature dependences of SDR (SDR3 and SDR5) and GST (GST4 and GST5) activities were evaluated based on the conversion efficiency of GGGE and MPHPV, respectively. The determination of the pH optimum was performed using the following buffers (100 mM): 2-(N-morpholino) ethanesulfonic acid (pH 5.5 to 7.0), 3-morpholinopropanesulfonic acid (pH 7.0 to 8.0), N-Tris(hydroxymethyl)methyl-3-aminopropanesulfonic acid (pH 8.0 to 9.0), N-cyclohexyl-2-aminoethanesulfonic acid (pH 9.0 to 10.0), and N-cyclohexyl-3-aminopropanesulfonic acid (pH 10.0 to 11.0). Values are presented as relative activity with the highest measured activity set to 100%. SDR kinetic experiments were conducted with varying concentrations of GGGE (0.06 to 5.0 mM) and VGGE (0.06 to 5.0 mM). GST kinetic experiments were conducted with varying concentrations of MPHPV (0.06 to 2.0 mM) and GVG (0.06 to 1.5 mM). All reactions were performed in triplicate.

Figure S4. Phylogenetic trees of aligned SDR and GST amino acid sequences.

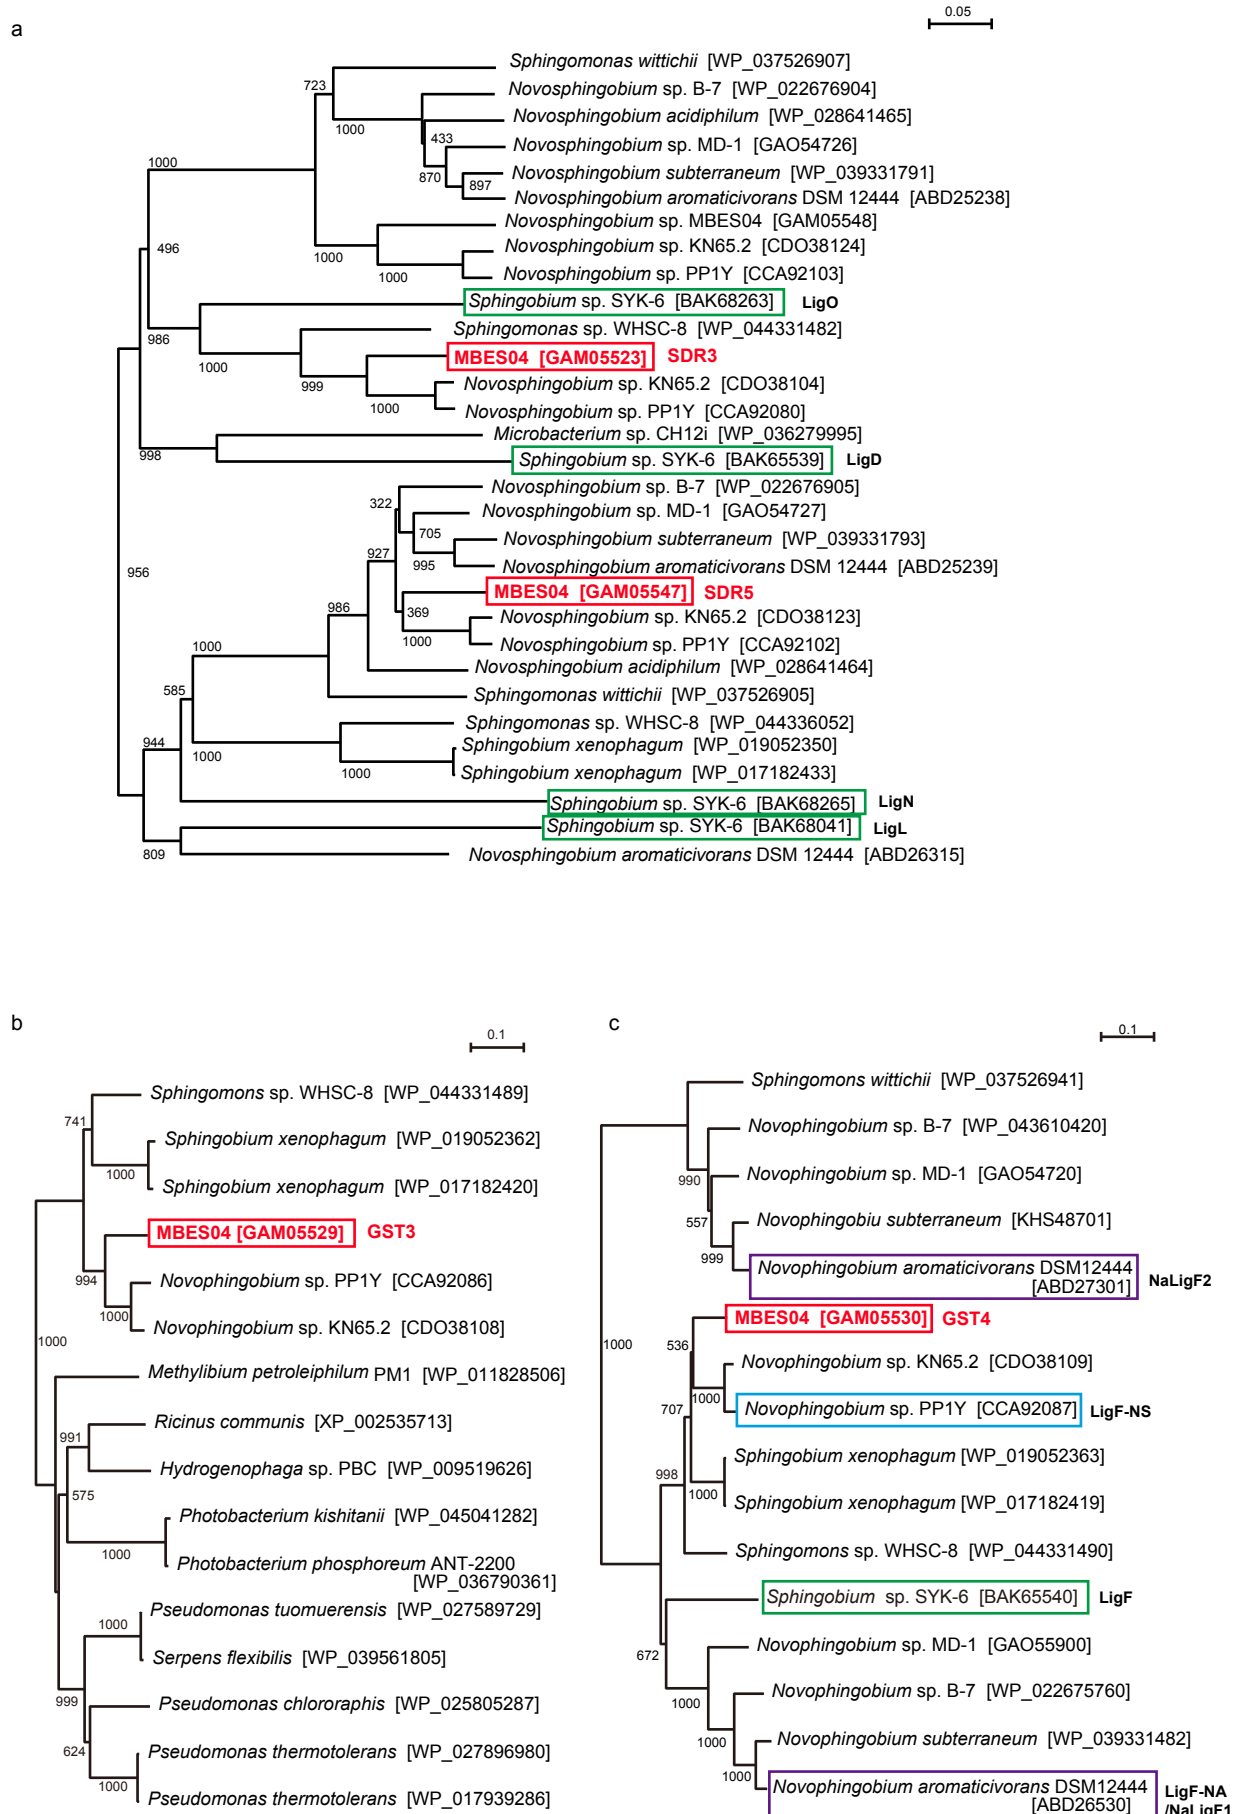

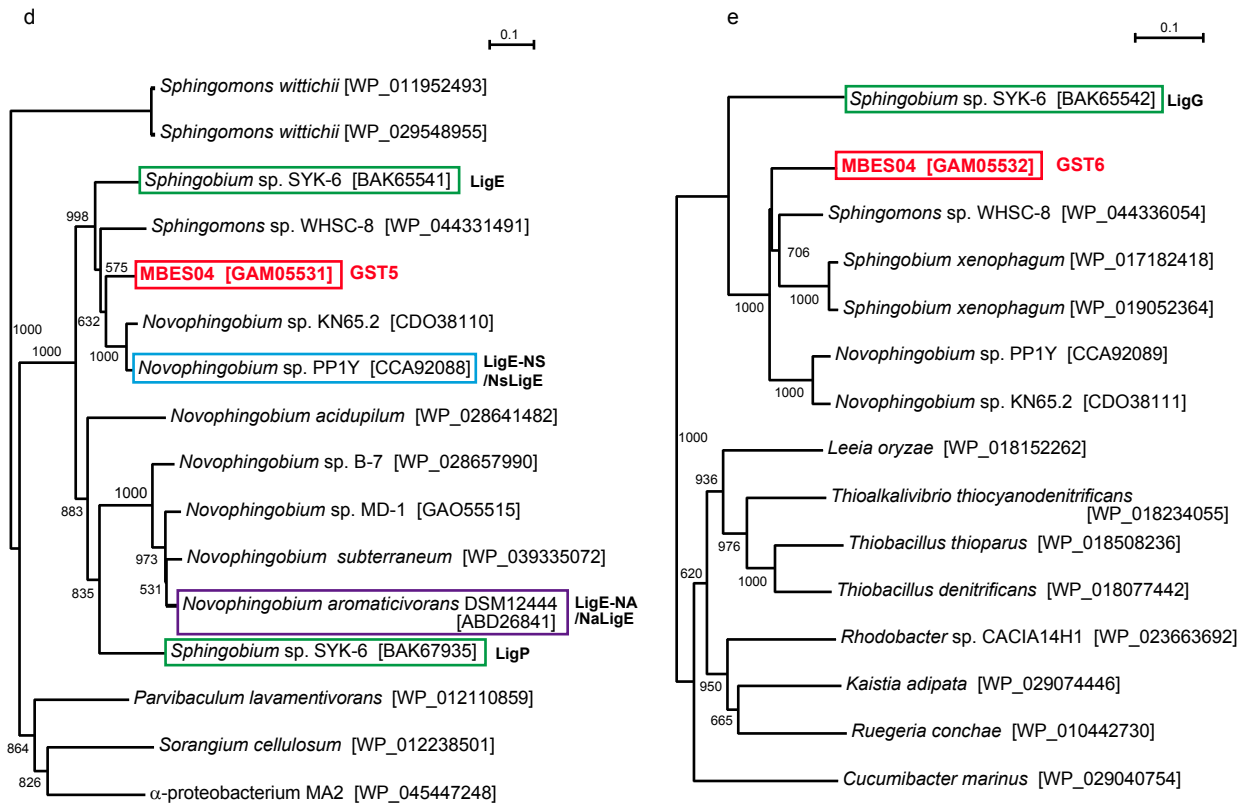

The aligned sequences depicted in (a) included the 15 most similar sequences to each SDR3 and SDR5 amino acid sequence found in the BLASTP database, in addition to the sequences of LigL and LigN. The GST sequences are the 15 most similar sequences to the GST3 (b), GST4 (c), GST5 (d), and GST6 (e) amino acid sequences in the BLASTP database. Enzymes with reported  $\alpha$ -dehydrogenase,  $\beta$ -etherase, and  $\beta$ -thioetherase activities are indicated by the colored boxes.

Figure S5. Expression levels of GGGE-metabolizing genes in strain MBES04.

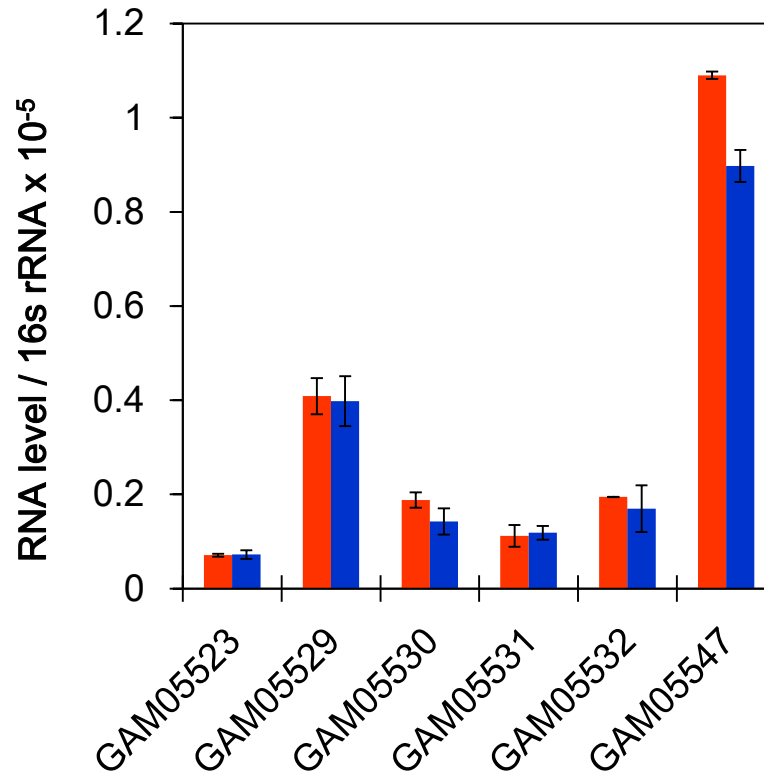

Gene expression levels were measured by qPCR in GGGE-supplemented (red bars) and control (blue bars) conditions. The levels are expressed as the ratio to the expression level of 16S RNA. RNA samples were extracted from two independent cultures for each defined medium condition and quantification of each sample qPCR was conducted in duplicate. Error bars indicate standard deviation.

**Figure S6.** MA plot of differentially expressed genes (DEG) in the transcriptome analysis of strain MBES04 in response to  $\beta$ -O-4 lignin model dimers.

**(a)** The GGGE-supplemented condition versus control condition

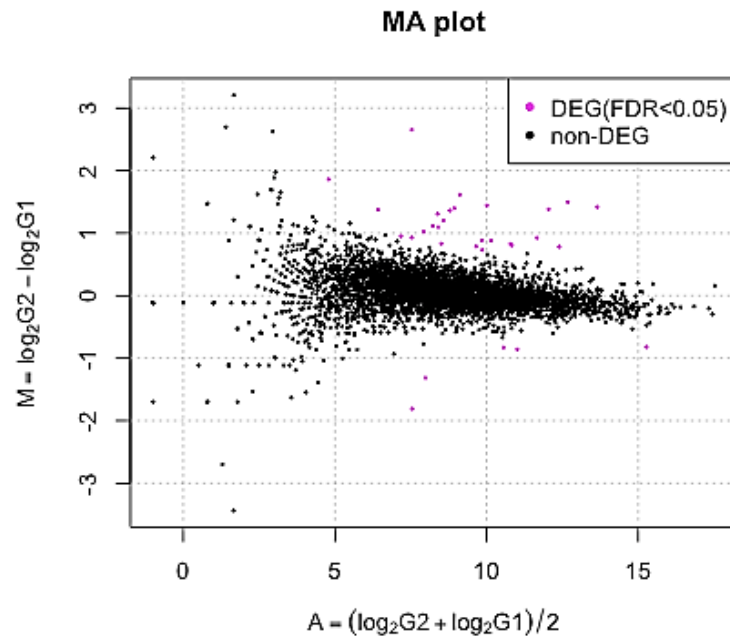

**(b)** The MPHPV-supplemented condition versus the control condition

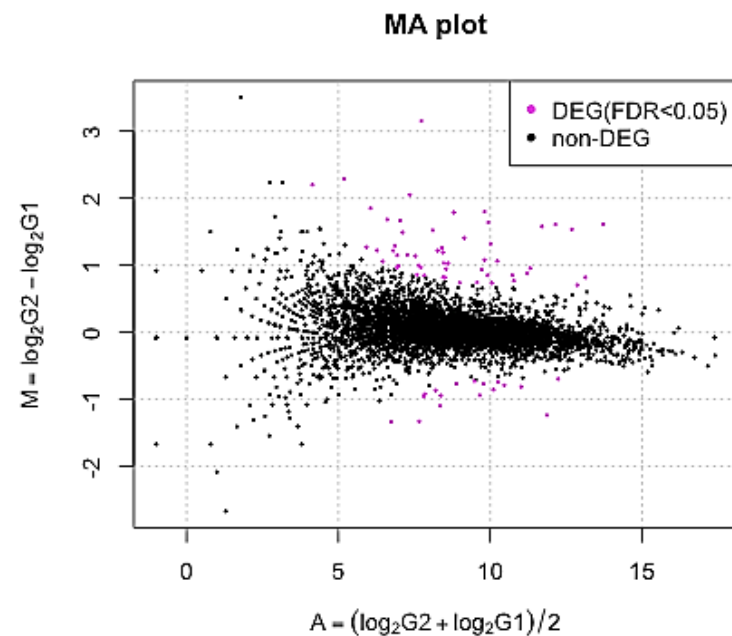

DEGs with significance ( $p < 0.05$ ; pink dots) and non-DEGs (black dots) in response to GGGE (a) and MPHPV (b) are shown in the MA plots. The a- and m-values were calculated as follows: a-value =  $1/2 \log_2(G_1 G_2) = \log_2(G_1) + \log_2(G_2)$ , m-value =  $\log_2(G_2/G_1) = \log_2(G_2) - \log_2(G_1)$ , G1: read counts in the control condition, G2: read counts in response to GGGE or MPHPV.



Figure S8.  $^{13}\text{C}$ -NMR spectrum of synthetic VGGE in  $\text{CDCl}_3$ .

VGGE [synthetic]  $^{13}\text{C}$ -NMR (126 MHz,  $\text{CDCl}_3$ )

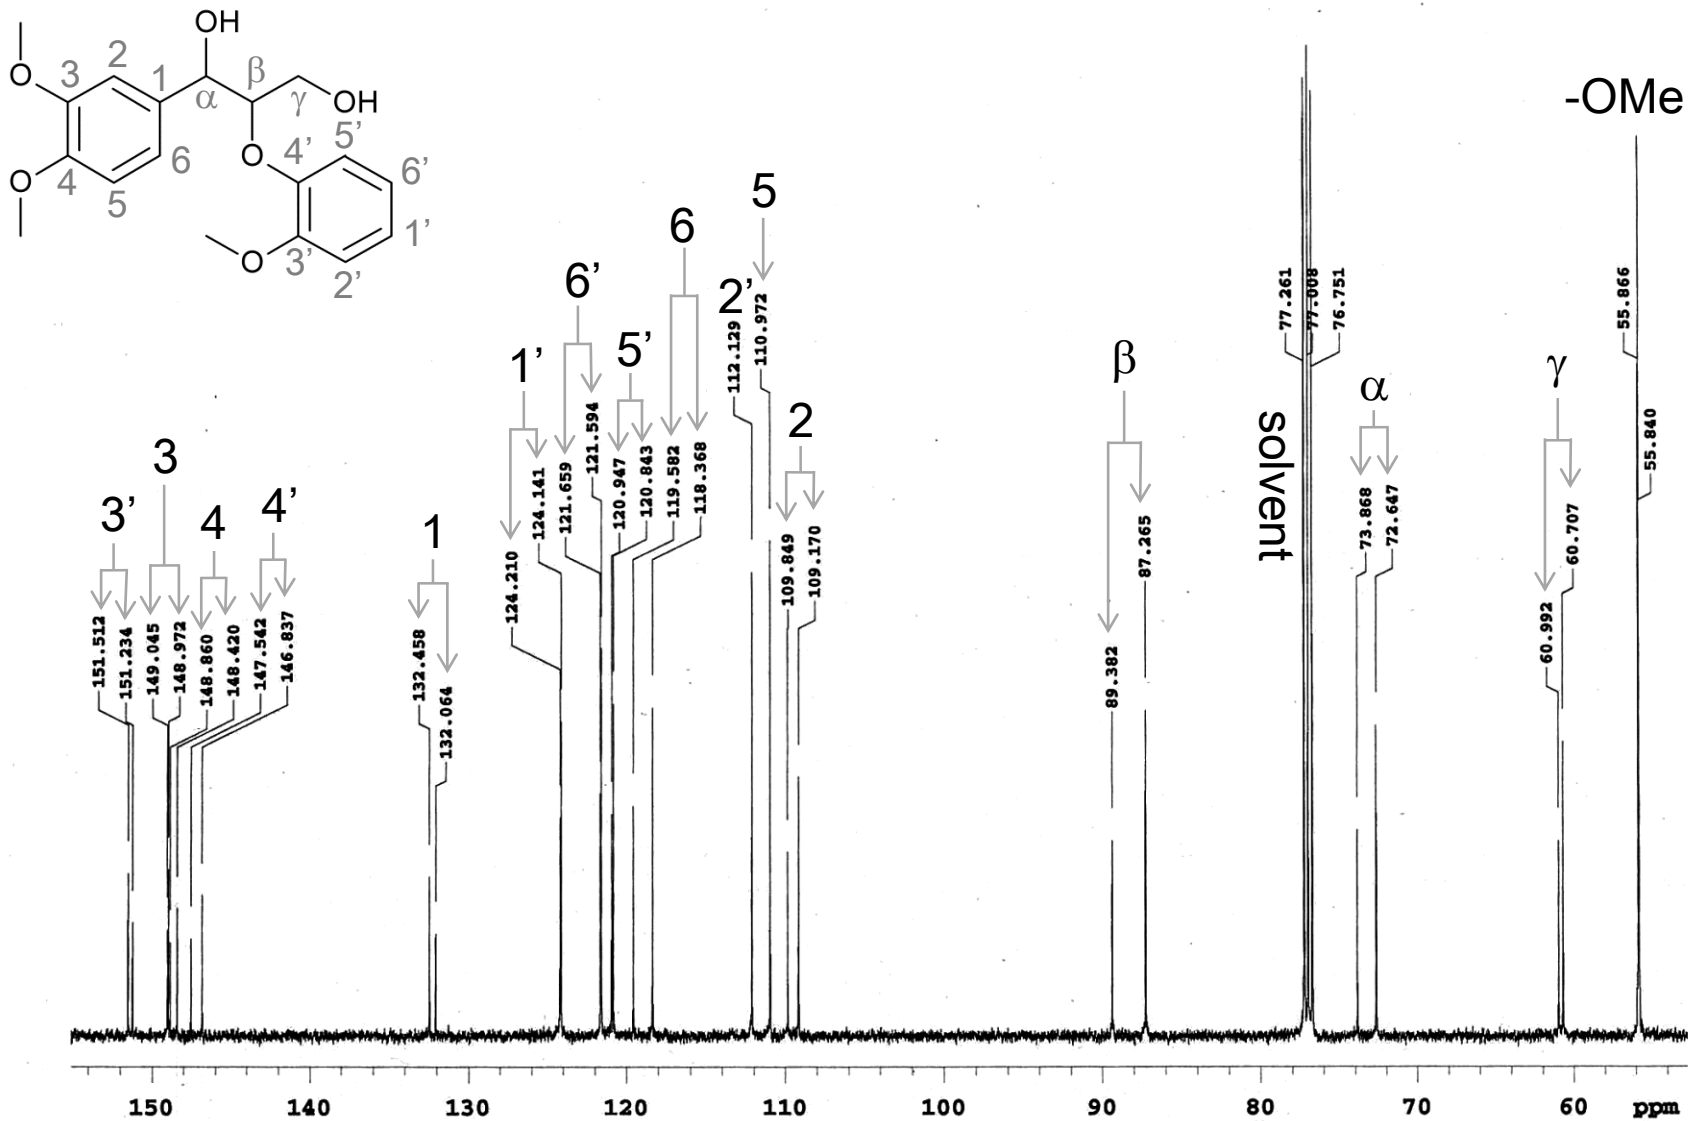

**Figure S9.** Chiral HPLC chromatograms of synthetic GGGE and MPHPV.

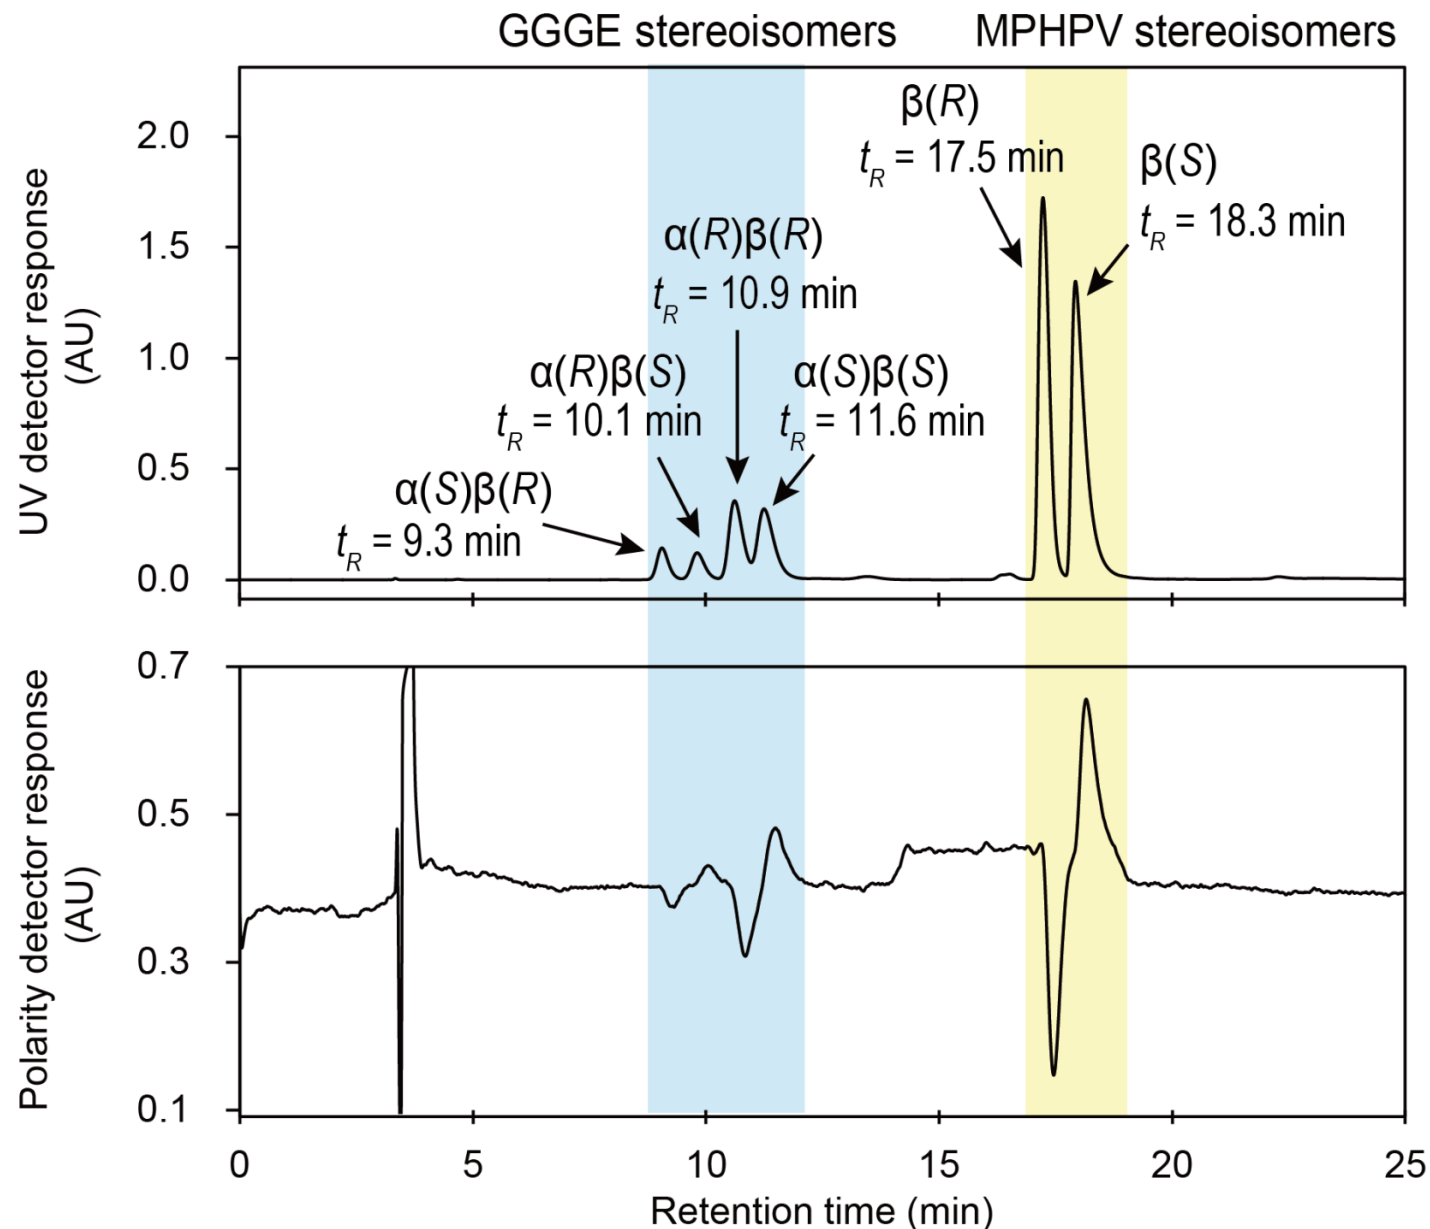

Four stereoisomers of GGGE and two stereoisomers of MPHPV were separated by UV absorbance at 270 nm (top) and optical rotation (bottom). The elution time is indicated below the peak identifications.



Figure S10. <sup>1</sup>H-NMR (a) and <sup>13</sup>C-NMR (b) spectra of synthetic GHP in CDCl<sub>3</sub>.

(a) GHP [synthetic] <sup>1</sup>H-NMR (500 MHz, CDCl<sub>3</sub>)

No.2012-145C1

File: Proton

Pulse Sequence: s2pul

Solvent: cdcl3

Ambient temperature

Operator: vnmr1

VNMRS-500 "vnmrs-500"

Relax. delay 1.500 sec

Pulse 45.0 degrees

Acq. time 3.500 sec

Width 8012.8 Hz

16 repetitions

OBSERVE H1, 499.8995968 MHz

DATA PROCESSING

Gauss apodization 1.228 sec

FT size 65536

Total time 1 min, 20 sec

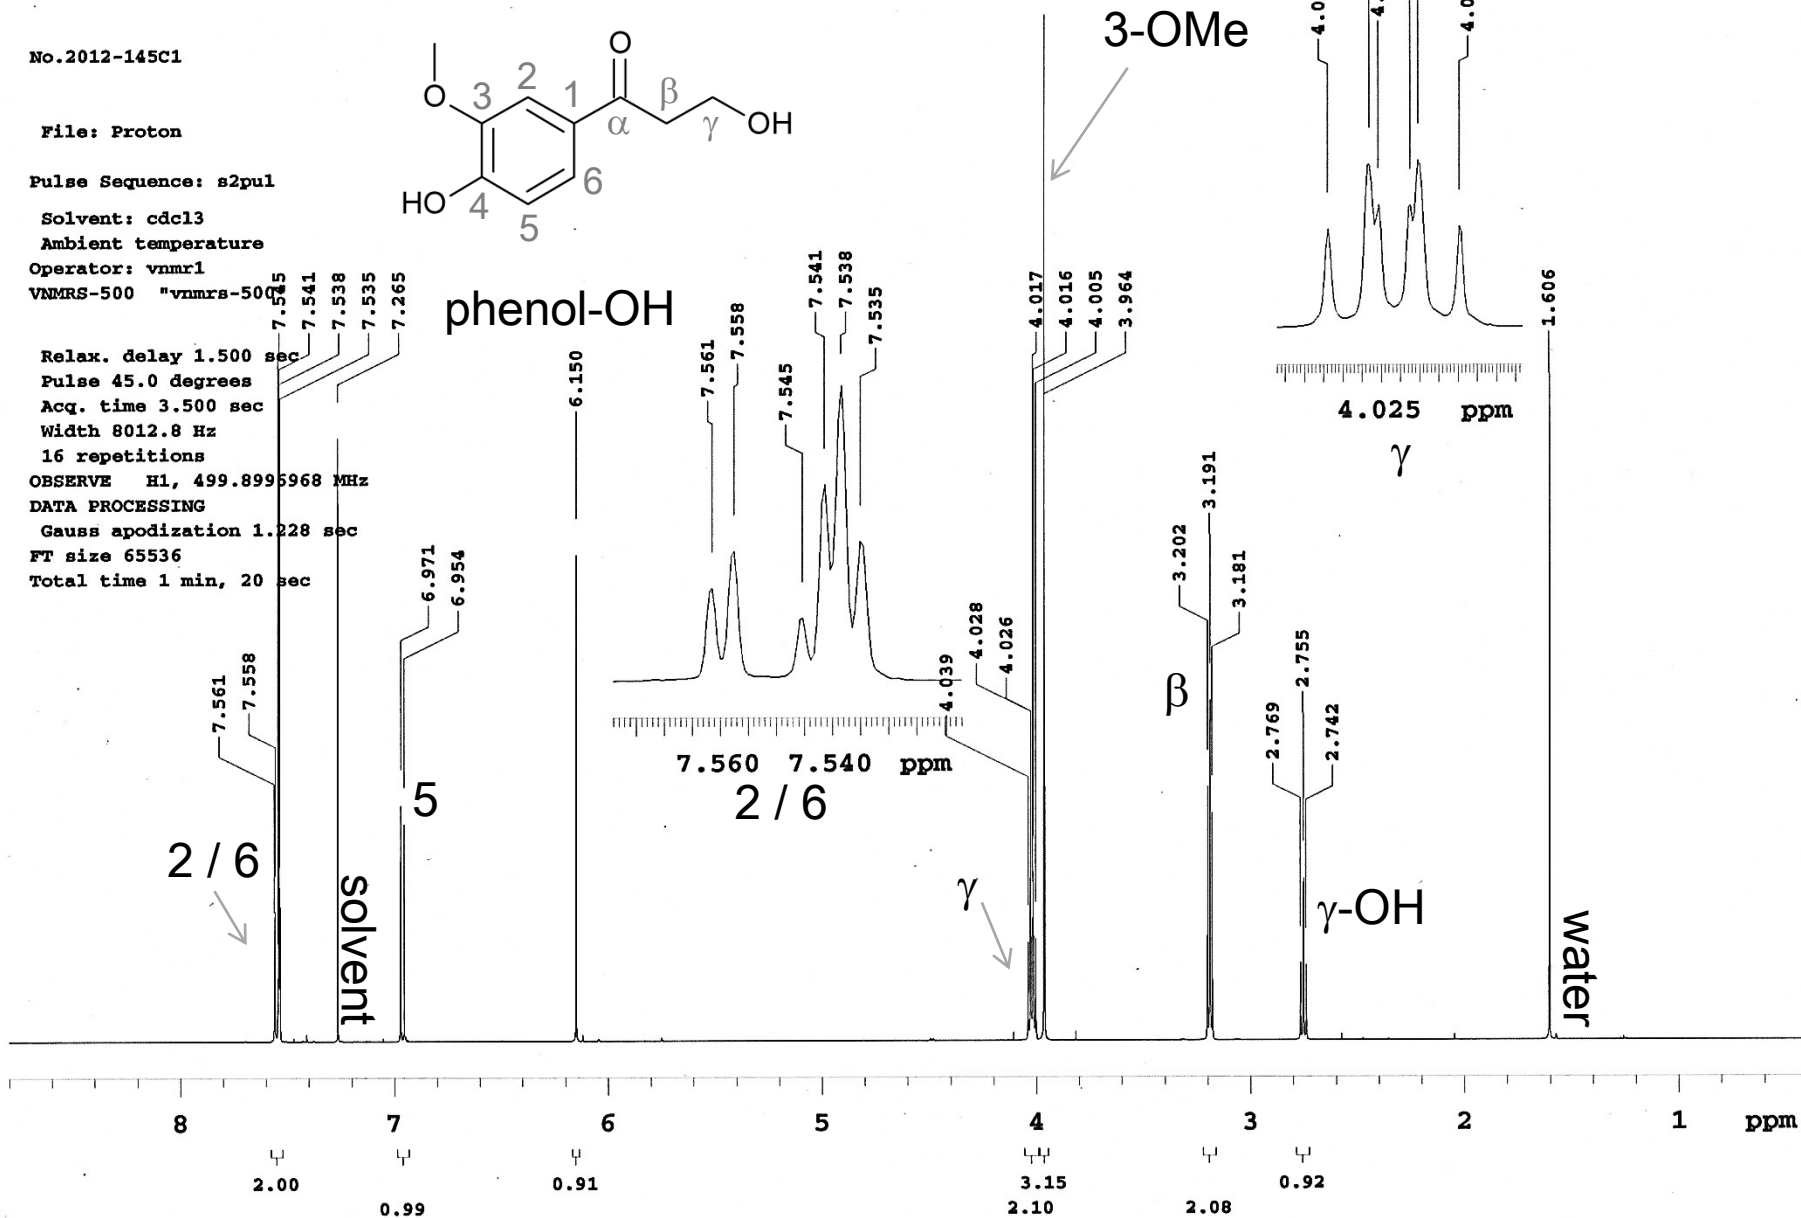

Figure S10, <sup>1</sup>H-NMR (a) and <sup>13</sup>C-NMR (b) spectra of synthetic GHP in CDCl<sub>3</sub>.

(b) GHP [synthetic] <sup>13</sup>C-NMR (126 MHz, CDCl<sub>3</sub>)

No.2012-145C1

File: Carbon

Pulse Sequence: s2pul

Solvent: cdcl3

Ambient temperature

Operator: vnmr1

VNMRS-500 "vnmrs-500"

Relax. delay 0.700 sec

Pulse 45.0 degrees

Acq. time 1.300 sec

Width 29761.9 Hz

1088 repetitions

OBSERVE C13, 125.6998786 MHz

DECOUPLE H1, 499.9021933 MHz

Power 41 dB

continuously on

WALTZ-16 modulated

DATA PROCESSING

Line broadening 1.0 Hz

FT size 131072

Total time 2 hr, 17 min, 8 sec

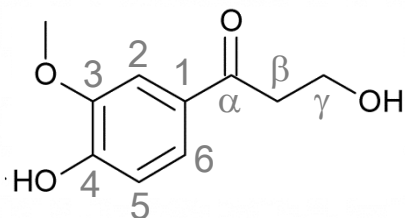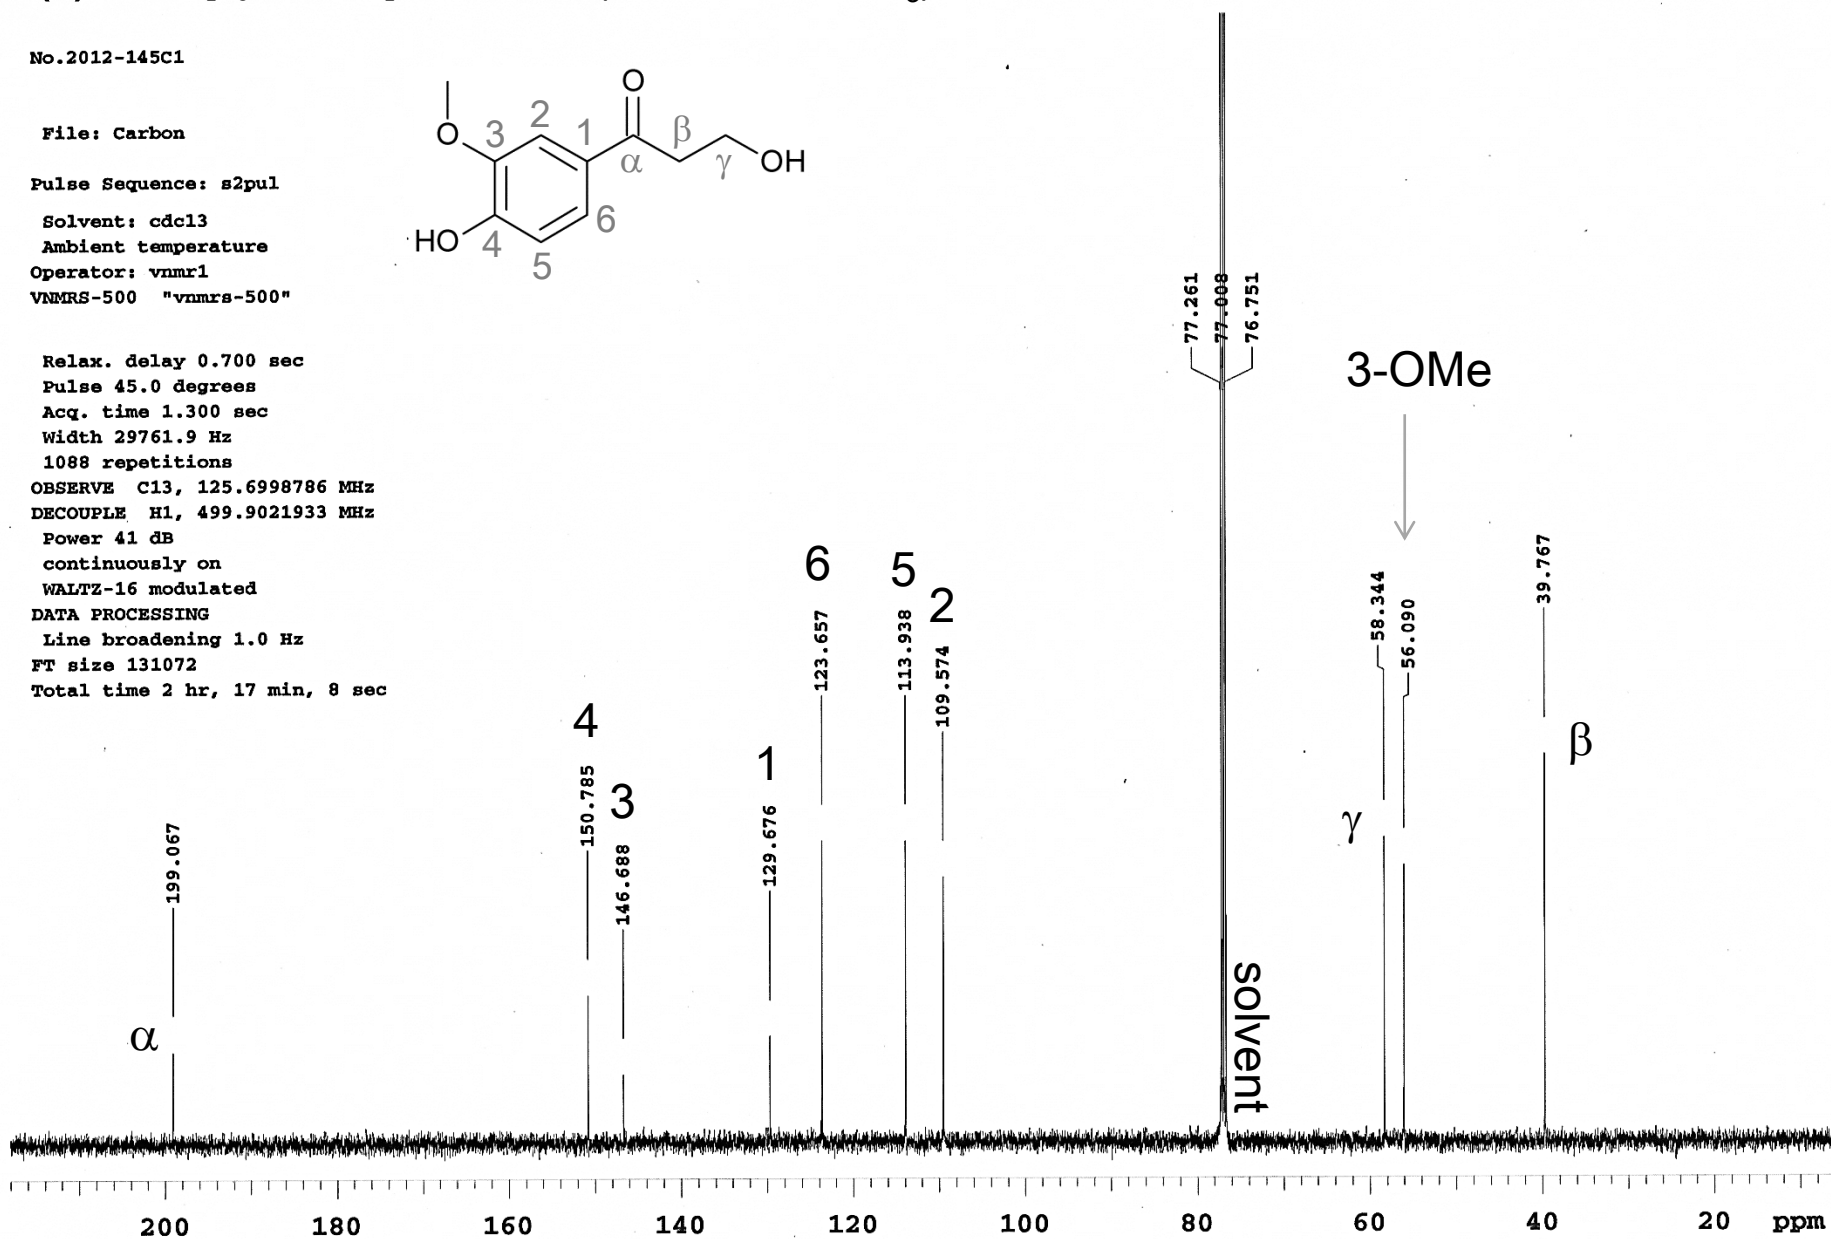

Figure S11. <sup>1</sup>H-NMR (a) and <sup>13</sup>C-NMR (b) spectra of biologically produced GHP in CDCl<sub>3</sub>.

(a) GHP [biologically produced] <sup>1</sup>H-NMR (500 MHz, CDCl<sub>3</sub>)

HGP (2012-102E56)

File: Proton

Pulse Sequence: s2pul

Solvent: cdcl3

Ambient temperature

Operator: vnmr1

VNMRS-500 "vnmrs-500"

Relax. delay 1.500 sec

Pulse 45.0 degrees

Acq. time 3.500 sec

Width 8012.8 Hz

16 repetitions

OBSERVE H1, 499.8996985 MHz

DATA PROCESSING

Line broadening 0.3 Hz

FT size 65536

Total time 1 min, 20 sec

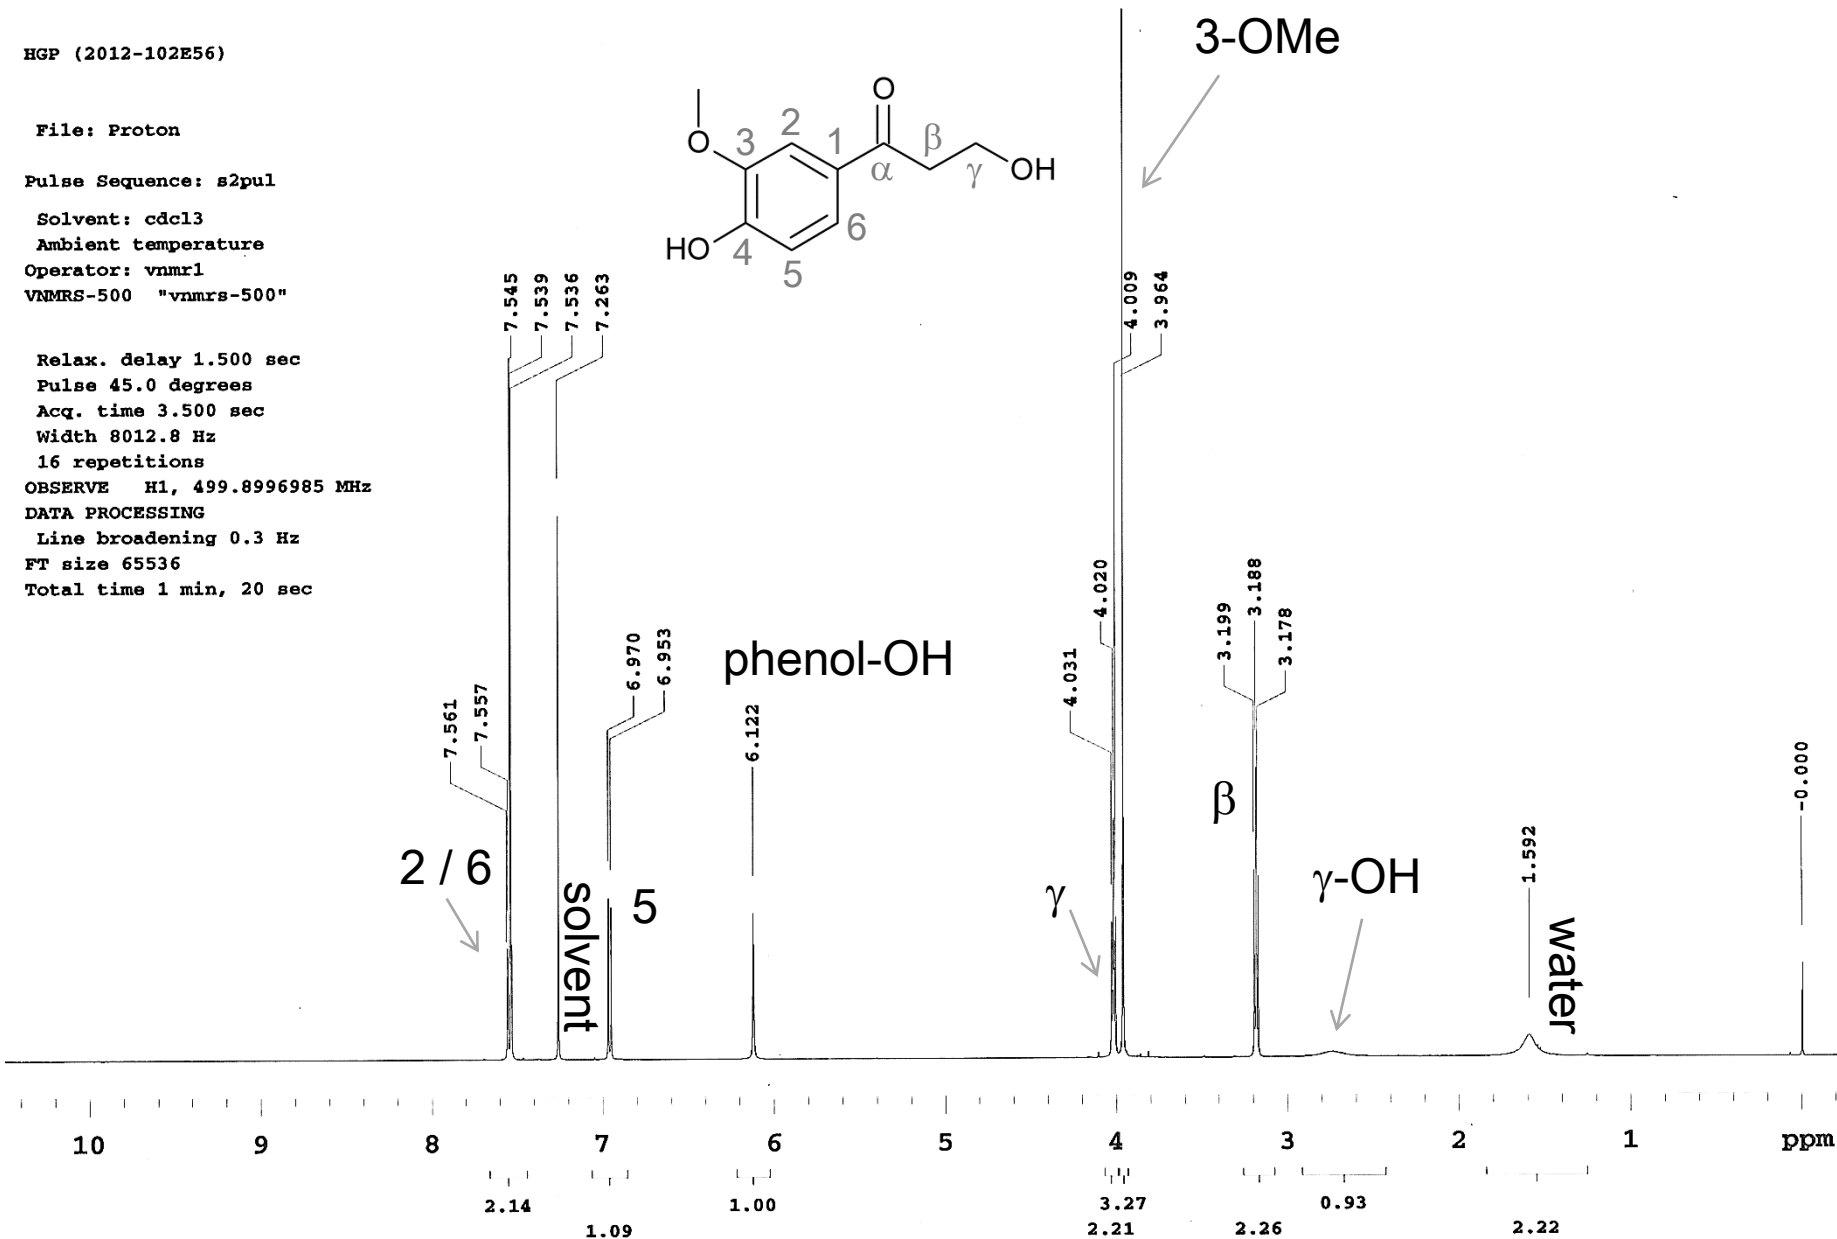

Figure S11. <sup>1</sup>H-NMR (a) and <sup>13</sup>C-NMR (b) spectra of biologically produced GHP in CDCl<sub>3</sub>.

(b) GHP [biologically produced] <sup>13</sup>C-NMR (126 MHz, CDCl<sub>3</sub>)

HGP (2012-102E56)

File: Carbon

Pulse Sequence: s2pul

Solvent: cdcl3

Ambient temperature

Operator: vnmr1

VNMRS-500 "vnmrs-500"

Relax. delay 0.700 sec

Pulse 45.0 degrees

Acq. time 1.300 sec

Width 29761.9 Hz

2048 repetitions

OBSERVE C13, 125.6998791 MHz

DECOUPLE H1, 499.9021933 MHz

Power 41 dB

continuously on

WALTZ-16 modulated

DATA PROCESSING

Line broadening 1.0 Hz

FT size 131072

Total time 1 hr, 8 min, 34 sec

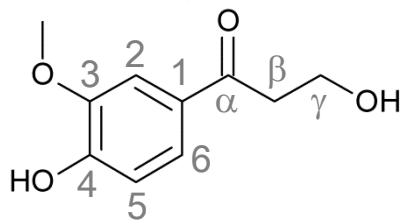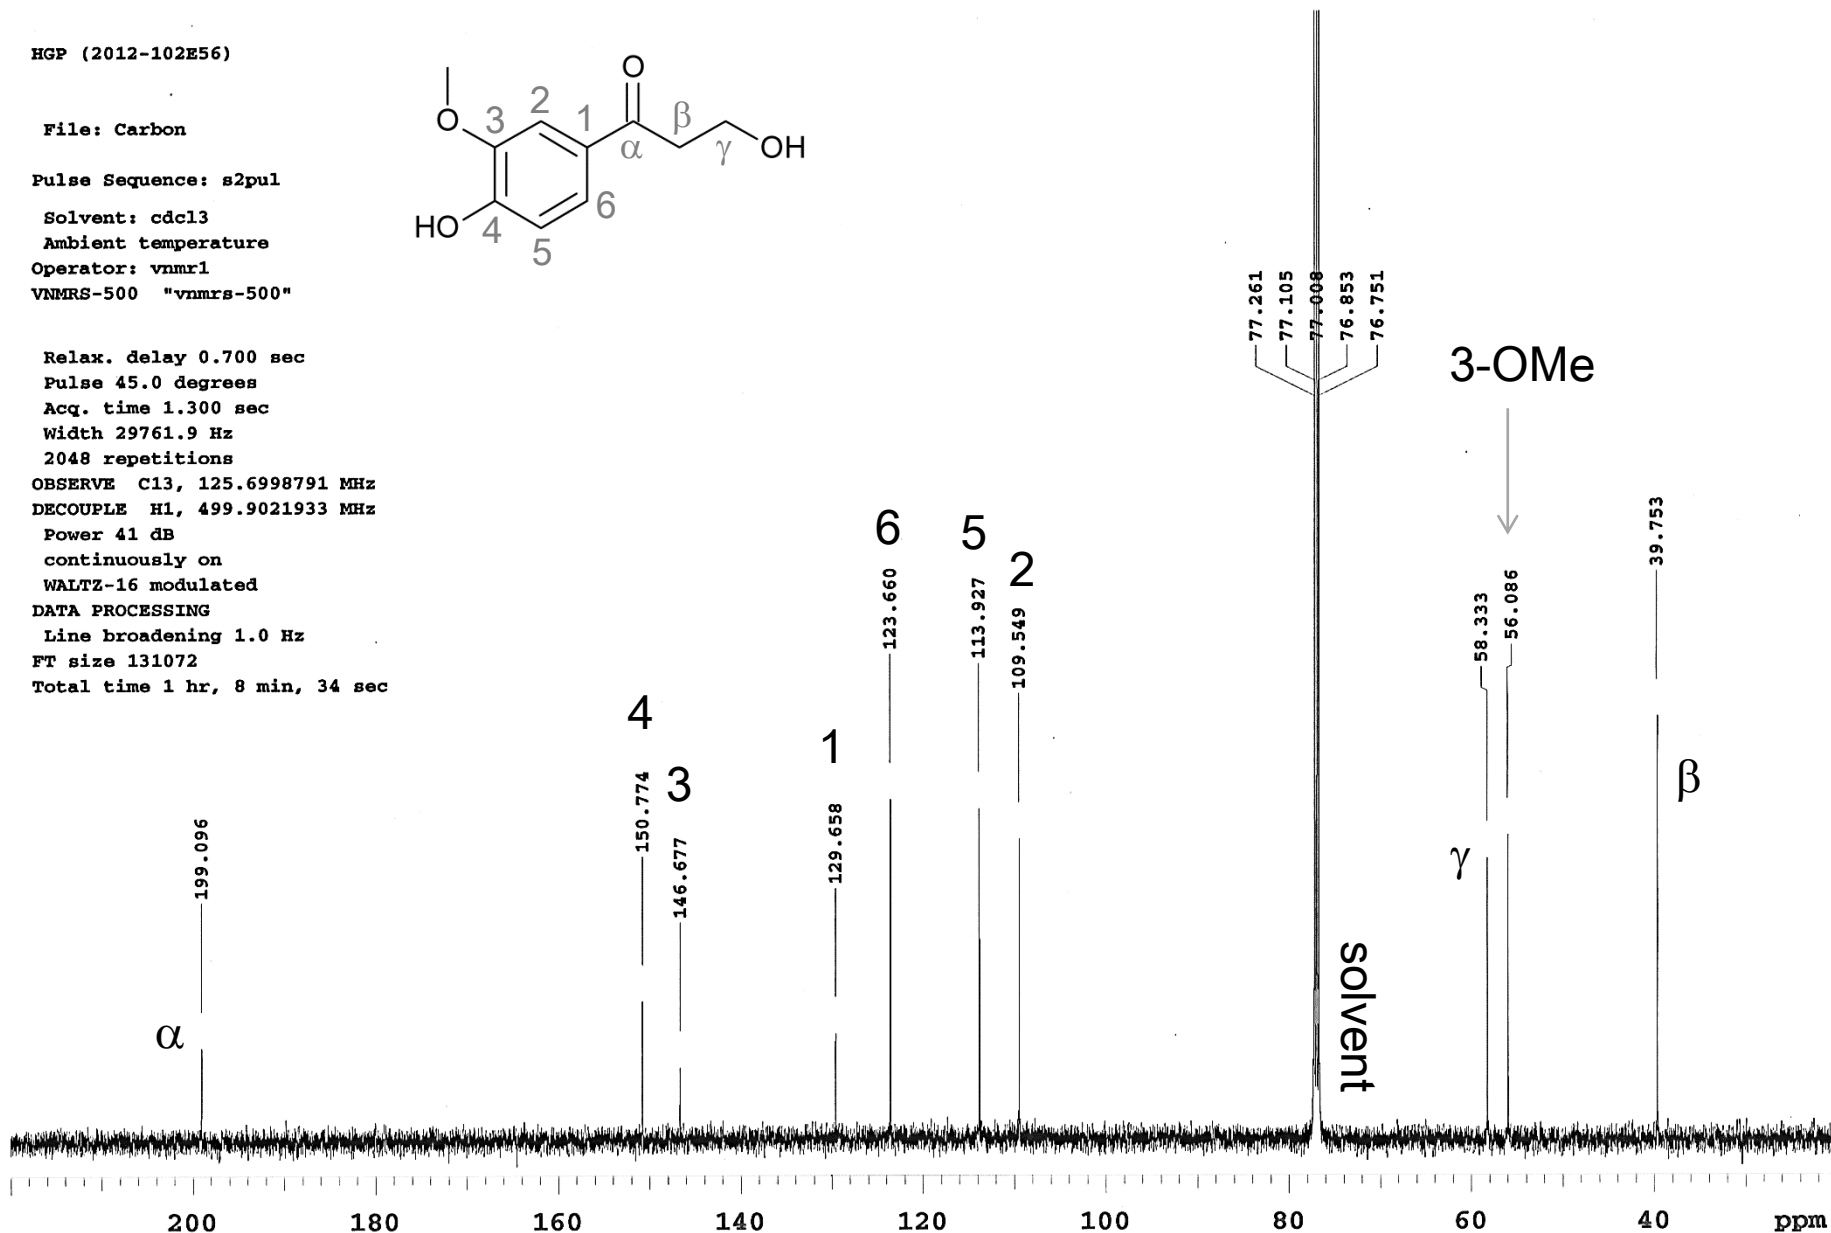

### III. Supplementary tables

**Table S1.** The putative genes for catalase-peroxidase and multicopper oxidase of strain MBES04

| Gene ID  | BLASTP search nearest hit                                           | Accession    | E-value  | Identity (%) | Conserved domain                               |
|----------|---------------------------------------------------------------------|--------------|----------|--------------|------------------------------------------------|
| GAM03180 | catalase-peroxidase<br>[ <i>Sphingobium</i> sp. AP49]               | WP_007712754 | 0.0E+00  | 80           | catalase_peroxidase_2                          |
| GAM05894 | peroxidase<br>[ <i>Altererythrobacter atlanticus</i> ]              | WP_046905285 | 0.0E+00  | 78           | catalase_peroxidase_2                          |
| GAM05893 | catalase-peroxidase<br>[ <i>Edwardsiella ictaluri</i> ]             | WP_015870368 | 5.0E-133 | 82           | catalase_peroxidase_1                          |
| GAM04190 | iron-dependent peroxidase<br>[ <i>Novosphingobium resinovorum</i> ] | EZP74749     | 1.0E-162 | 58           | predicted iron-dependent peroxidase, COG2837   |
| GAM04037 | polyphenol oxidase<br>[ <i>Sphingomonas</i> sp. WHSC-8]             | WP_044335145 | 3.0E-118 | 72           | multicopper polyphenol oxidase (laccase), yfiH |
| GAM03576 | oxidase<br>[ <i>Citromicrobium bathyomarinum</i> ]                  | WP_010240406 | 0.0E+00  | 98           | multicopper oxidase, PRK10965                  |

**Table S2.** PCR primers used for the gene cloning

| Target   | Primer name | Sequence                               |
|----------|-------------|----------------------------------------|
| pRSETA   | vec_fw      | TCTCGAGCTCGGATCC                       |
|          | vec_rv      | CTGGTACCATGGAATTCG                     |
| GAM06260 | sdr1_fw     | GGATCCGAGCTCGAGATGATCAAGGGTATCGAAGG    |
|          | sdr1_rv     | CGAATTCCATGGTACCAGTCAGAACTCCTGTGCGG    |
| GAM06111 | sdr2_fw     | GGATCCGAGCTCGAGATGACGAACTGGCTTATCAC    |
|          | sdr2_rv     | CGAATTCCATGGTACCAGTCAGACCTCGGCGAAG     |
| GAM05523 | sdr3_fw     | GGATCCGAGCTCGAGATGACACAGGTAAAGGGACG    |
|          | sdr3_rv     | CGAATTCCATGGTACCAGTCATGCCGTCTTTTCCTC   |
| GAM05534 | sdr4_fw     | GGATCCGAGCTCGAGATGGGAGAGACGACAAAAC     |
|          | sdr4_rv     | CGAATTCCATGGTACCAGTCAGGTGAGGTCGGC      |
| GAM05547 | sdr5_fw     | GGATCCGAGCTCGAGATGCAGGATCTACCGGG       |
|          | sdr5_rv     | CGAATTCCATGGTACCGCAAGCTGTGTTCATGC      |
| GAM05547 | sdr6_fw     | GGATCCGAGCTCGAGATGACGGGCGGGG           |
|          | sdr6_rv     | CGAATTCCATGGTACCAGTCAGAGCGCGTTGGC      |
| GAM05529 | gst3_fw     | GGATCCGAGCTCGAGATGCTGGAAGTGTGGACTTC    |
|          | gst3_rv     | CGAATTCCATGGTACCAGGTAGGTGTGCTCATCGTTCA |
| GAM05530 | gst4_fw     | GGATCCGAGCTCGAGATGTTGACGCTGTACAGCTTTG  |
|          | gst4_rv     | CGAATTCCATGGTACCAGTCCTCAGGCCTGTGC      |
| GAM05531 | gst5_fw     | GGATCCGAGCTCGAGATGGCCAAGGACAACC        |
|          | gst5_rv     | CGAATTCCATGGTACCAGTCAGCTCGCCGTAGC      |
| GAM05532 | gst6_fw     | GGATCCGAGCTCGAGATGGCATGGGACGATG        |
|          | gst6_rv     | CGAATTCCATGGTACCAGGATGACGGTGTGCTTCAC   |

**Table S3.** Biochemical characterization and kinetics of SDRs (a) and GSTs (b) from strain MBES04 and comparison of those of closely related enzymes.

| a | Parameter                                           | Substrate | Enzyme  |         |         |
|---|-----------------------------------------------------|-----------|---------|---------|---------|
|   |                                                     |           | SDR3    | SDR5    | LigD*   |
|   | optimal pH                                          | GGGE      | 9       | 9-10    | 9       |
|   | optimal Temperature                                 |           | 15      | 30      | 60      |
|   | specific activity (mU/mg)                           |           | 3.4E+02 | 4.3E+04 | 1.2E+04 |
|   | $v_{max}$ (mU)                                      |           | 4.2E+02 | 4.6E+04 | 7.9E+03 |
|   | $K_M$ (mM)                                          |           | 9.7E-01 | 2.0E-01 | 1.1E+00 |
|   | $k_{cat}$ (min <sup>-1</sup> )                      |           | 1.6E+01 | 1.7E+03 | 2.6E+02 |
|   | $k_{cat}/K_M$ (min <sup>-1</sup> mM <sup>-1</sup> ) |           | 1.6E+01 | 8.6E+03 | 2.4E+02 |
|   | specific activity (mU/mg)                           | VGGE      | 7.4E+01 | 2.9E+04 | N.D.    |
|   | $V_{max}$ (mU)                                      |           | 1.0E+02 | 3.8E+04 | N.D.    |
|   | $K_M$ (mM)                                          |           | 1.5E+00 | 1.1E+00 | N.D.    |
|   | $k_{cat}$ (min <sup>-1</sup> )                      |           | 3.9E+00 | 1.4E+03 | N.D.    |
|   | $k_{cat}/K_M$ (min <sup>-1</sup> mM <sup>-1</sup> ) |           | 2.5E+00 | 1.3E+03 | N.D.    |

  

| b | Parameter                                           | Substrate                                              | Enzyme  |         |           |           |         |         |           |           |         |         |
|---|-----------------------------------------------------|--------------------------------------------------------|---------|---------|-----------|-----------|---------|---------|-----------|-----------|---------|---------|
|   |                                                     |                                                        | GST4    | LigF**  | LigF-NS** | LigF-NA** | GST5    | LigE**  | LigE-NS** | LigE-NA** | LigP**  |         |
|   | optimal pH                                          | MHPV                                                   | 9       | N.D.    | N.D.      | N.D.      | N.D.    | 7-8     | N.D.      | N.D.      | N.D.    | N.D.    |
|   | optimal Temperature                                 |                                                        | 35      | N.D.    | N.D.      | N.D.      | N.D.    | 40      | N.D.      | N.D.      | N.D.    | N.D.    |
|   | specific activity (mU/mg)                           |                                                        | 1.0E+03 | N.D.    | N.D.      | N.D.      | N.D.    | 8.2E+01 | N.D.      | N.D.      | N.D.    | N.D.    |
|   | $v_{max}$ (mU)                                      |                                                        | 1.3E+03 | N.D.    | N.D.      | N.D.      | N.D.    | 9.8E+01 | N.D.      | N.D.      | N.D.    | N.D.    |
|   | $K_M$ (mM)                                          |                                                        | 4.7E-01 | N.D.    | N.D.      | N.D.      | N.D.    | 2.9E-01 | N.D.      | N.D.      | N.D.    | N.D.    |
|   | $k_{cat}$ (min <sup>-1</sup> )                      |                                                        | 4.5E+01 | N.D.    | N.D.      | N.D.      | N.D.    | 3.5E+00 | N.D.      | N.D.      | N.D.    | N.D.    |
|   | $k_{cat}/K_M$ (min <sup>-1</sup> mM <sup>-1</sup> ) |                                                        | 9.5E+01 | N.D.    | N.D.      | N.D.      | N.D.    | 1.2E+01 | N.D.      | N.D.      | N.D.    | N.D.    |
|   | optimal pH                                          | GVG                                                    | N.D.    | 9       | 9         | 9         | N.D.    | 9       | 9         | 9         | 9       | 9       |
|   | optimal Temperature                                 |                                                        | N.D.    | 25      | < 20      | 25        | N.D.    | 30      | < 20      | < 20      | < 20    | 25      |
|   | specific activity (mU/mg)                           |                                                        | 3.7E+02 | 5.3E+02 | 3.0E+02   | 2.9E+03   | 1.7E+02 | 2.2E+03 | 1.4E+02   | 1.5E+02   | 1.5E+02 | 6.2E+00 |
|   | $v_{max}$ (mU)                                      |                                                        | 5.3E+02 | N.D.    | N.D.      | N.D.      | 2.7E+02 | N.D.    | N.D.      | N.D.      | N.D.    | N.D.    |
|   | $K_M$ (mM)                                          |                                                        | 5.5E-01 | N.D.    | N.D.      | N.D.      | 7.8E-01 | N.D.    | N.D.      | N.D.      | N.D.    | N.D.    |
|   | $k_{cat}$ (min <sup>-1</sup> )                      |                                                        | 1.8E+01 | N.D.    | N.D.      | N.D.      | 9.5E+00 | N.D.    | N.D.      | N.D.      | N.D.    | N.D.    |
|   | $k_{cat}/K_M$ (min <sup>-1</sup> mM <sup>-1</sup> ) |                                                        | 3.2E+01 | N.D.    | N.D.      | N.D.      | 1.2E+01 | N.D.    | N.D.      | N.D.      | N.D.    | N.D.    |
|   | specific activity (mU/mg)                           | $\alpha$ -O-( $\beta$ -methyl-umbeliferyl)acetovanillo | N.D.    | 3.7E+00 | 1.7E-01   | 3.1E+00   | N.D.    | 7.0E-03 | 1.2E-02   | 2.7E+01   | 4.1E-02 | 4.1E-02 |
|   | $v_{max}$ (mU)                                      |                                                        | N.D.    | 5.0E+00 | 2.6E-01   | 4.9E+00   | N.D.    | 1.0E-02 | 2.1E-02   | 3.3E+01   | 6.7E-02 | 6.7E-02 |
|   | $K_M$ (mM)                                          |                                                        | N.D.    | 3.1E-02 | 6.0E-02   | 4.8E-02   | N.D.    | 5.4E-02 | 6.4E-02   | 2.4E-02   | 7.4E-02 | 7.4E-02 |
|   | $k_{cat}$ (min <sup>-1</sup> )                      |                                                        | N.D.    | 1.6E-01 | 6.0E-03   | 1.4E-01   | N.D.    | 3.4E-04 | 6.7E-04   | 1.0E+00   | 2.1E-03 | 2.1E-03 |
|   | $k_{cat}/K_M$ (min <sup>-1</sup> mM <sup>-1</sup> ) |                                                        | N.D.    | 5.2E+00 | 1.0E-01   | 2.9E+00   | N.D.    | 6.4E-03 | 1.0E-02   | 4.2E+01   | 2.8E-02 | 2.8E-02 |

\* Data retrieved from Reiter *et al.* (*Green Chem*, 2013, 15, 1373-1381). LigD; GenBank; BAA02030.1 from *Sphingobium* sp. SYK-6

\*\* Data retrieved from Picart *et al.* (*ChemSusChem*, 2014, 7, 3164-3171).

LigF; GenBank; BAK6554 from *Sphingobium* sp. SYK-6, LigF-NS; GenBank; CCA92087 from *Novosphingobium* sp. PP1Y, LigF-NS; GenBank; ABD26530, from *N. aromaticivorans* DSM 12444. LigE; GenBank; BAK65541 from *Sphingobium* sp. SYK-6, LigE-NS; GenBank; CCA92088 from *Novosphingobium* sp. PP1Y, LigE-NS; GenBank; ABD26841 from *N. aromaticivorans* DSM 12444. LigP; GenBank; BAK67935 from *Sphingobium* sp. SYK-6

N.D. ; not determined.

Table S4. Distribution of possible GGGE-metabolizing genes in the Sphingomonadaceae family

| No. | Organism                                                               | Origin of isolation                                                                                                                                | Number of potential homologous enzymes to: |      |             |      |                 |      | Reference sequene data   |            |               |                      | Accession number |            |             |            | Literature                        |
|-----|------------------------------------------------------------------------|----------------------------------------------------------------------------------------------------------------------------------------------------|--------------------------------------------|------|-------------|------|-----------------|------|--------------------------|------------|---------------|----------------------|------------------|------------|-------------|------------|-----------------------------------|
|     |                                                                        |                                                                                                                                                    | α-dehydrogenases                           |      | β-etherases |      | β-thioetherases |      | Genome sequencing status | Format     | Number of CDS | Number of nucleotide | Chromosomes      |            | Plasmids    |            |                                   |
|     |                                                                        |                                                                                                                                                    | SDR3                                       | SDR5 | GST4        | GST5 | GST3            | GST6 |                          |            |               |                      | RefSeq           | INSDC      | RefSeq      | INSDC      |                                   |
| 1   | <i>Novosphingobium aromaticivorans</i> DSM 12444                       | sediments collected 410 m below the land surface near Allendale, S.C.                                                                              | 15                                         | 11   | 3           | 1    | 1               | 0    |                          |            | 3,937         | 4,233,314            | NC_007794.1      | CP000248.1 | NC_009426.1 | CP000676.1 | Frederickson <i>et al.</i> , 1991 |
| 2   | <i>Novosphingobium</i> sp. PP1Y                                        | seawater from the harbor of Pozzuoli in Naples, Italy                                                                                              | 13                                         | 7    | 2           | 1    | 2               | 1    |                          |            | 4,683         | 5,313,905            | NC_015580.1      | FR856862.1 | NC_009427.1 | CP000677.1 | D'Argenio <i>et al.</i> , 2011    |
| 3   | <i>Sphingobium chlorophenicum</i> L-1                                  | soil                                                                                                                                               | 5                                          | 7    | 0           | 0    | 3               | 0    |                          |            | 4,072         | 4,573,221            | NC_015593.1      | CP002798.1 | NC_015579.1 | FR856860.1 | Copley <i>et al.</i> , 2012       |
| 4   | <i>Sphingobium japonicum</i> UT26S                                     | HCH-contaminated soils                                                                                                                             | 8                                          | 2    | 0           | 0    | 4               | 0    |                          |            | 4,394         | 4,424,862            | NC_014006.1      | AP010803.1 | NC_014007.1 | AP010805.1 | Nagata <i>et al.</i> , 2010       |
| 5   | <i>Sphingobium</i> sp. SYK-6                                           | pond for the treatment of waste liquor from a kraft pulp mill.                                                                                     | 8                                          | 9    | 2           | 2    | 1               | 1    |                          |            | 4,063         | 4,348,133            | NC_015976.1      | AP012222.1 | NC_015583.1 | FR856861.1 | Masai <i>et al.</i> , 2007        |
| 6   | <i>Sphingomonas sanxanigenens</i> DSM 19645 = NX02                     | topsoil collected from a cornfield in Xinhe County, PR China                                                                                       | 6                                          | 8    | 0           | 0    | 2               | 0    |                          |            | 4,361         | 6,205,897            |                  | CP006644.1 | NC_014009.1 | AP010807.1 | Huang <i>et al.</i> , 2009        |
| 7   | <i>Sphingomonas</i> sp. MM-1                                           | contaminated soil with technical-HCH                                                                                                               | 9                                          | 6    | 0           | 0    | 2               | 0    |                          |            | 5,855         | 4,633,613            | NC_020561.1      | CP004036.1 | NC_015974.1 | AP012223.1 | Tabata <i>et al.</i> , 2013       |
| 8   | <i>Sphingomonas wittichii</i> RW1                                      | River Elbe                                                                                                                                         | 9                                          | 5    | 0           | 1    | 4               | 0    |                          |            | 5,345         | 5,915,246            | NC_009511.1      | CP000699.1 | NC_020542.1 | CP004037.1 | Cua and Stein, 2014               |
| 9   | <i>Sphingopyxis alaskensis</i> RB2256                                  | oceanic surface water                                                                                                                              | 2                                          | 4    | 0           | 0    | 3               | 0    | complete                 |            | 3,195         | 3,373,713            | NC_008048.1      | CP000356.1 | NC_020562.1 | CP004038.1 | Hoffmann <i>et al.</i> , 2012     |
| 10  | <i>Zymomonas mobilis</i> subsp. <i>mobilis</i> ATCC 10988              | Mexican pulque fermentations                                                                                                                       | 2                                          | 1    | 0           | 0    | 0               | 0    |                          |            | 1,803         | 2,143,461            | NC_017262.1      | CP002850.1 | NC_020563.2 | CP004041.2 | Pappas <i>et al.</i> , 2011       |
| 11  | <i>Zymomonas mobilis</i> subsp. <i>mobilis</i> ATCC 29191              | palm wine fermentations in Kinshasa, Congo                                                                                                         | 1                                          | 0    | 0           | 0    | 0               | 0    |                          |            | 1,709         | 2,008,345            | NC_018145.1      | CP003704.1 | NC_020543.1 | CP004039.1 | Desimiotis <i>et al.</i> , 2012   |
| 12  | <i>Zymomonas mobilis</i> subsp. <i>mobilis</i> NCIMB 11163             | British ale-fermenting                                                                                                                             | 4                                          | 2    | 0           | 0    | 0               | 0    |                          |            | 1,840         | 2,223,520            | NC_013355.1      | CP001722.1 | NC_020544.1 | CP004040.1 | Kouvelis <i>et al.</i> , 2009     |
| 13  | <i>Zymomonas mobilis</i> subsp. <i>mobilis</i> str. CP4 = NRRL B-14023 | sugarcane fermentations                                                                                                                            | 2                                          | 1    | 0           | 0    | 0               | 0    |                          |            | 1,884         | 2,163,236            | NC_022900.1      | CP006818.1 | NC_009507.1 | CP000700.1 | Kouvelis <i>et al.</i> , 2014     |
| 14  | <i>Zymomonas mobilis</i> subsp. <i>mobilis</i> ZM4 = ATCC 31821        | fermenting cane juice                                                                                                                              | 3                                          | 1    | 0           | 0    | 0               | 0    |                          |            | 1,748         | 2,056,363            | NC_006526.2      | AE008692.2 | NC_009508.1 | CP000701.1 | Seo <i>et al.</i> , 2005          |
| 15  | <i>Zymomonas mobilis</i> subsp. <i>pomacae</i> ATCC 29192              | sick cider in Bristol, England                                                                                                                     | 0                                          | 0    | 0           | 0    | 0               | 0    |                          |            | 1,736         | 2,061,413            | NC_015709.1      | CP002865.1 | NC_017180.1 | CP002851.1 | Kouvelis <i>et al.</i> , 2011     |
| 16  | <i>Blastomonas</i> sp. CACIA14H2                                       | water sample collected from the Tucuruí hydroelectric dam in Pará, Brazil                                                                          | 4                                          | 4    | 0           | 0    | 3               | 0    |                          |            | 3,787         | 4,067,409            |                  | -          | NC_017181.1 | CP002853.1 | Lima <i>et al.</i> , 2014         |
| 17  | <i>Novosphingobium lindaniclasticum</i> LE124                          | high-dosage-point HCH dumpsite (450 mg HCH/g soil) in Lucknow, India                                                                               | 2                                          | 1    | 0           | 0    | 2               | 0    |                          |            | 5,214         | 4,857,928            |                  | -          | NC_017182.1 | CP002855.1 | Saxena <i>et al.</i> , 2013       |
| 18  | <i>Novosphingobium nitrogenifigens</i> DSM 19370                       | a bioreactor treating nitrogen-deficient pulp and paper-mill effluent, New Zealand                                                                 | 0                                          | 1    | 0           | 0    | 2               | 0    |                          |            | 4,566         | 4,182,647            |                  | -          | NC_017183.1 | CP002852.1 | Addison <i>et al.</i> , 2007      |
| 19  | <i>Novosphingobium pentaromativorans</i> US6-1                         | muddy sediments of Ulsan Bay, Republic of Korea                                                                                                    | 10                                         | 7    | 0           | 0    | 2               | 0    |                          | amino acid | 3,801         | 5,344,974            |                  | -          | NC_017184.1 | CP002854.1 | Lyu <i>et al.</i> , 2014          |
| 20  | <i>Novosphingobium resinovorum</i>                                     | -                                                                                                                                                  | 8                                          | 7    | 0           | 0    | 1               | 0    |                          |            | 5,234         | 6,304,486            |                  | -          | NC_017185.1 | CP002856.1 | Lim <i>et al.</i> , 2007          |
| 21  | <i>Novosphingobium</i> sp. AP12                                        | cottonwood rhizosphere                                                                                                                             | 12                                         | 7    | 0           | 0    | 1               | 0    |                          |            | 5,737         | 5,611,617            |                  | -          | NC_018147.1 | CP003706.1 | Brown <i>et al.</i> , 2012        |
| 22  | <i>Novosphingobium</i> sp. Rr 2-17                                     | grapevine crown gall tumor                                                                                                                         | 4                                          | 1    | 0           | 0    | 1               | 0    |                          |            | 4,302         | 4,539,029            |                  | -          | NC_018146.1 | CP003705.1 | Gan <i>et al.</i> , 2012          |
| 23  | <i>Sphingobium baderi</i> LL03                                         | hexachlorocyclohexane (HCH)-contaminated soil from Spolana, Czech Republic                                                                         | 2                                          | 3    | 0           | 0    | 2               | 0    |                          |            | 4,187         | 4,848,286            |                  | -          | NC_013357.1 | CP001724.1 | Kaur <i>et al.</i> , 2013         |
| 24  | <i>Sphingobium chinhatense</i> IP26                                    | HCH dumpsite located at Chinhat, Lucknow, India                                                                                                    | 7                                          | 1    | 0           | 0    | 4               | 0    |                          |            | 4,212         | 5,847,843            |                  | -          | NC_013358.1 | CP001725.1 | Niharika <i>et al.</i> , 2013     |
| 25  | <i>Sphingobium herbicidovorans</i> NBRC 16415                          | soil in Vienna, Austria                                                                                                                            | 8                                          | 7    | 0           | 0    | 1               | 0    |                          |            | 4,807         | 6,304,486            |                  | -          | NC_022901.1 | CP006891.1 | Zipper <i>et al.</i> , 1996       |
| 26  | <i>Sphingobium indicum</i> B90A                                        | sugarcane rhizosphere                                                                                                                              | 7                                          | 1    | 0           | 0    | 1               | 0    |                          |            | 4,513         | 4,082,196            |                  | -          | NC_022902.1 | CP006893.1 | Anand <i>et al.</i> , 2012        |
| 27  | <i>Sphingobium japonicum</i> BfD32                                     | -                                                                                                                                                  | 3                                          | 2    | 0           | 0    | 2               | 0    |                          |            | 5,703         | 4,788,005            |                  | -          | NC_022903.1 | CP006894.1 | -                                 |
| 28  | <i>Sphingobium lactosutens</i> DS20                                    | hexachlorocyclohexane (HCH)-contaminated dumpsite located at Lucknow, Uttar Pradesh, India                                                         | 6                                          | 2    | 0           | 0    | 2               | 0    |                          |            | 4,646         | 5,360,246            |                  | -          | NC_022910.1 | CP006895.1 | Kumar R <i>et al.</i> , 2013      |
| 29  | <i>Sphingobium quisquiliarium</i> P25                                  | heavily contaminated (450 mg HCH/g of soil) HCH dumpsite located near Lucknow, India                                                               | 4                                          | 4    | 0           | 0    | 1               | 0    | draft                    |            | 5,737         | 4,170,546            |                  | -          | NC_02913.1  | CP006892.1 | Kumar SA <i>et al.</i> , 2013     |
| 30  | <i>Sphingobium</i> sp. Ant17                                           | oil-contaminated soil collected near Scott Base on Ross Island, Antarctica                                                                         | 2                                          | 2    | 0           | 0    | 1               | 0    |                          |            | 3,919         | 5,238,558            |                  | -          | NC_0123.1   | AGFM010001 | Adriaenssens <i>et al.</i> , 2014 |
| 31  | <i>Sphingobium</i> sp. AP49                                            | root of <i>Populus deltoides</i>                                                                                                                   | 4                                          | 2    | 0           | 0    | 2               | 0    |                          |            | 4,671         | 4,479,274            |                  | -          | AGFM010001  | AGFM010001 | Brown <i>et al.</i> , 2012        |
| 32  | <i>Sphingobium</i> sp. C100                                            | polycyclic aromatic hydrocarbon (PAH)-degrading consortium, which was enriched from the deep-sea sediment of the Makarov Basin in the Arctic Ocean | 1                                          | 3    | 0           | 0    | 1               | 0    |                          |            | 5,288         | 4,776,810            |                  | -          | AGFM010001  | AGFM010001 | Dong <i>et al.</i> , 2014         |
| 33  | <i>Sphingobium</i> sp. HDIP04                                          | hexachlorocyclohexane contaminated environment                                                                                                     | 7                                          | 2    | 0           | 0    | 4               | 0    |                          |            | 4,033         | 4,741,576            |                  | -          | ATHO000000  | -          | Mukherjee U <i>et al.</i> , 2013  |
| 34  | <i>Sphingobium ummariense</i> RL-3                                     | hexachlorocyclohexane (HCH) dumpsite located at Ummari village in Lucknow, India                                                                   | 6                                          | 2    | 0           | 0    | 3               | 0    |                          |            | 4,645         | 4,754,053            |                  | -          | AUWY000000  | -          | Kohli <i>et al.</i> , 2013        |
| 35  | <i>Sphingobium yanoikuyae</i> ATCC 51230                               | clinical specimen                                                                                                                                  | 7                                          | 6    | 0           | 0    | 1               | 0    |                          |            | 5,067         | 5,532,579            |                  | -          | AGZU000000  | -          | Yabuuchi <i>et al.</i> , 1990     |
| 36  | <i>Sphingomonas paucimobilis</i>                                       | clinical specimen                                                                                                                                  | 3                                          | 2    | 0           | 0    | 1               | 0    |                          |            | 6,283         | 4,874,185            |                  | -          | JFYU000000  | -          | Nandy <i>et al.</i> , 2013        |
| 37  | <i>Sphingomonas</i> sp. LH128                                          | soil                                                                                                                                               | 10                                         | 8    | 0           | 0    | 1               | 0    |                          |            | 4,705         | 6,463,118            |                  | -          | ALVC000000  | -          | Fida <i>et al.</i> , 2013         |
| 38  | <i>Sphingomonas</i> sp. RIT328                                         | cultivars and <i>Salix viminalis</i> × <i>Salix miyabeana</i> grown in bioenergy                                                                   | 0                                          | 1    | 0           | 0    | 2               | 0    |                          |            | 4,002         | 4,343,511            |                  | -          | JFYU000000  | -          | Gan <i>et al.</i> , 2014          |
| 39  | <i>Sphingomonas</i> sp. S17                                            | modern stromatolite community in Socompa Lake (3,800-m altitude), placed near the active volcano Socompa in northwest Argentina                    | 3                                          | 2    | 0           | 0    | 1               | 0    |                          |            | 4,014         | 4,268,406            | NZ_AFG000        | AFGG000000 | 000000.1    | 00.1       | Eugenia <i>et al.</i> , 2011      |
| 40  | <i>Sphingomonas</i> sp. SKA58                                          | seawater                                                                                                                                           | 4                                          | 3    | 0           | 0    | 1               | 0    |                          |            | 3,835         | 3,887,535            | NZ_AAQ000        | AAQ0000000 | 00.1        | 00.1       | -                                 |
| 41  | <i>Sphingopyxis</i> sp. MC1                                            | activated sludge from a waste water treatment plants in Seattle, USA                                                                               | 2                                          | 2    | 0           | 0    | 4               | 0    |                          |            | 3,467         | 3,653,464            | NZ_AOUN00        | AOUN000000 | 000000.1    | 00.1       | -                                 |

Continue to the next page



Continued from the previous page

| No.                                    | Organism                                                  | Origin of isolation                                                                                                                       | Number of potential homologous enzymes to: |      |             |      |                 |      | Reference sequene data   |            |               |                      | Accession number |            |          |       | Literature                      |
|----------------------------------------|-----------------------------------------------------------|-------------------------------------------------------------------------------------------------------------------------------------------|--------------------------------------------|------|-------------|------|-----------------|------|--------------------------|------------|---------------|----------------------|------------------|------------|----------|-------|---------------------------------|
|                                        |                                                           |                                                                                                                                           | α-dehydrogenases                           |      | β-etherases |      | β-thioetherases |      | Genome sequencing status | Format     | Number of CDS | Number of nucleotide | Chromosomes      |            | Plasmids |       |                                 |
|                                        |                                                           |                                                                                                                                           | SDR3                                       | SDR5 | GST4        | GST5 | GST3            | GST6 |                          |            |               |                      | RefSeq           | INSDC      | RefSeq   | INSDC |                                 |
| 42                                     | <i>Blastomonas</i> sp. AAP53                              | surface water of the Swan Lake, a freshwater desert lake in the Inner Mongolia Autonomous Region, China.                                  | 2                                          | 3    | 0           | 0    | 2               | 0    |                          |            |               | 3,616,216            | NZ_ANFZ000       | ANFZ000000 | -        | -     | Zeng <i>et al.</i> , 2013       |
| 43                                     | <i>Citromicrobium bathyomarinum</i> JL354                 | surface water of the South China Sea                                                                                                      | 4                                          | 3    | 0           | 0    | 1               | 0    |                          |            |               | 3,273,334            | NZ_ADAE000       | ADAE000000 | -        | -     | Jiao <i>et al.</i> , 2010       |
| 44                                     | <i>Citromicrobium</i> sp. JLT1363                         | surface water of the South China Sea                                                                                                      | 1                                          | 0    | 0           | 0    | 1               | 0    |                          |            |               | 3,117,324            | NZ_AEUE000       | AEUE000000 | -        | -     | Zheng <i>et al.</i> , 2011      |
| 45                                     | <i>Novosphingobium acidiphilum</i> DSM 19966              | subsurface water of the acidic bog lake, Lake Grosse Fuchskuhle in Brandenburg, Germany                                                   | 3                                          | 3    | 1           | 1    | 1               | 0    |                          |            |               | 3,708,535            | NZ_AUBA000       | AUBA000000 | -        | -     | Glaeser <i>et al.</i> , 2009    |
| 46                                     | <i>Novosphingobium nitroreducens</i> DSM 19370            | pulp and paper-mill effluents, New Zealand                                                                                                | 2                                          | 1    | 0           | 0    | 2               | 0    |                          |            |               | 4,864,130            | NZ_AEWJ000       | AEWJ000000 | -        | -     | Addison <i>et al.</i> , 2007    |
| 47                                     | <i>Novosphingobium</i> sp. B-7                            | steeping fluid of an eroded bamboo strips                                                                                                 | 3                                          | 3    | 2           | 1    | 1               | 0    |                          |            |               | 4,148,973            | NZ_APCQ000       | APCQ000000 | -        | -     | Chen <i>et al.</i> , 2012       |
| 48                                     | <i>Sandarakinothabdas limnophila</i> DSM 17366            | mesotrophic freshwater lake Starnberger See in Bavaria Germany,                                                                           | 1                                          | 1    | 0           | 0    | 2               | 0    |                          |            |               | 3,131,544            | NZ_ATVO000       | ATVO000000 | -        | -     | Gich and Overmann., 2006        |
| 49                                     | <i>Sandarakinothabdas</i> sp. AAP62                       | surface water of the Shahu Lake in the Ningxia Hui Autonomous Region, China                                                               | 1                                          | 1    | 0           | 0    | 4               | 0    |                          |            |               | 2,613,739            | NZ_ANFY000       | ANFY000000 | -        | -     | Yonghui <i>et al.</i> , 2013    |
| 50                                     | <i>Sphingobium lucknowense</i> F2                         | hexachlorocyclohexane (HCH) dumpsite located in Umhari village, Lucknow, India                                                            | 8                                          | 1    | 0           | 0    | 4               | 0    |                          |            |               | 4,916,599            | NZ_JANF000       | JANF000000 | -        | -     | Neji <i>et al.</i> , 2014       |
| 51                                     | <i>Sphingobium</i> sp. KK22                               | phenanthrene enrichment culture of a bacterial consortium that grew on diesel fuel sewage sludge of a domestic wastewater treatment plant | 11                                         | 2    | 0           | 0    | 1               | 0    |                          |            |               | 4,756,373            | NZ_BATN000       | BATN000000 | -        | -     | Kunihiro <i>et al.</i> , 2013   |
| 52                                     | <i>Sphingobium</i> sp. YL23                               | river water, Germany                                                                                                                      | 1                                          | 1    | 0           | 0    | 1               | 0    |                          |            |               | 4,486,420            | NZ_ASTG000       | ASTG000000 | -        | -     | Hu <i>et al.</i> , 2013         |
| 53                                     | <i>Sphingobium xenophagum</i> NBRC 107872 DNA             | sludge samples, China                                                                                                                     | 4                                          | 3    | 2           | 0    | 2               | 1    |                          |            |               | 4,221,110            | NZ_BARE000       | BARE000000 | -        | -     | Pal R <i>et al.</i> , 2006      |
| 54                                     | <i>Sphingobium xenophagum</i> QYY                         | petroleum-contaminated soils                                                                                                              | 4                                          | 3    | 2           | 0    | 2               | 1    |                          |            |               | 5,357,836            | NZ_AKIB000       | AKIB000000 | -        | -     | Mar Qu Y <i>et al.</i> , 2013   |
| 55                                     | <i>Sphingobium yanoikuyae</i> XLDN2-5                     | plate contaminant, and defined as <i>Pseudomonas echinoides</i>                                                                           | 6                                          | 7    | 0           | 0    | 2               | 0    |                          |            |               | 3,800,099            | NZ_AFXE000       | AFXE000000 | -        | -     | Gai <i>et al.</i> , 2011        |
| 56                                     | <i>Sphingomonas echinoides</i> ATCC 14820                 | Stone Valley Lake, Pennsylvania                                                                                                           | 2                                          | 2    | 0           | 0    | 2               | 0    |                          |            |               | 4,046,117            | NZ_AHIR000       | AHIR000000 | -        | -     | Shin <i>et al.</i> , 2012b      |
| 57                                     | <i>Sphingomonas elodea</i> ATCC 31461                     | freshwater sample collected at Misasa in Tottori, Japan                                                                                   | 1                                          | 1    | 0           | 0    | 1               | 0    |                          |            |               | 3,869,482            | NZ_AGFU000       | AGFU000000 | -        | -     | Videir <i>et al.</i> , 2000     |
| 58                                     | <i>Sphingomonas jaspisi</i> DSM 18422                     | Tobacco leaf                                                                                                                              | 1                                          | 2    | 0           | 0    | 1               | 0    |                          |            |               | 4,180,007            | NZ_JFBV000       | JFBV000000 | -        | -     | Asker <i>et al.</i> , 2007      |
| 59                                     | <i>Sphingomonas melonis</i> C3                            | melon fruit                                                                                                                               | 2                                          | 1    | 0           | 0    | 1               | 0    |                          |            |               | 4,124,388            | NZ_AQUJ000       | AQUJ000000 | -        | -     | Innerebner <i>et al.</i> , 2011 |
| 60                                     | <i>Sphingomonas melonis</i> DAPP-PG 224                   | <i>Arabidopsis thaliana</i> fruit                                                                                                         | 1                                          | 1    | 0           | 0    | 2               | 0    |                          |            |               | 2,547,846            | NZ_AQZT000       | AQZT000000 | -        | -     | Buonaurio <i>et al.</i> , 2002  |
| 61                                     | <i>Sphingomonas melonis</i> FR1                           | phyllosphere of a leguminous tree, <i>Acacia caven</i> , in central Argentina                                                             | 2                                          | 1    | 0           | 0    | 1               | 0    |                          |            |               | 563,360              | NZ_ATTG000       | ATTG000000 | -        | -     | Innerebner <i>et al.</i> , 2011 |
| 62                                     | <i>Sphingomonas phyllosphaerae</i> FA2                    | pond water                                                                                                                                | 1                                          | 1    | 0           | 0    | 1               | 0    |                          |            |               | 651,875              | NZ_ATTI000       | ATTI000000 | -        | -     | Innerebner <i>et al.</i> , 2011 |
| 63                                     | <i>Sphingomonas phyllosphaerae</i> FA2                    | activated sludge                                                                                                                          | 2                                          | 5    | 0           | 0    | 1               | 0    | draft                    | nucleotide | not relevant  | 519,583              | NZ_ATYK000       | ATYK000000 | -        | -     | Rivas <i>et al.</i> , 2004      |
| 64                                     | <i>Sphingomonas</i> sp. ATCC 31555                        | soil that suffered long-term HCH contamination in an insecticide factory                                                                  | 1                                          | 2    | 0           | 0    | 1               | 0    |                          |            |               | 1,382,646            | NZ_ALBQ000       | ALBQ000000 | -        | -     | Wang <i>et al.</i> , 2012       |
| 65                                     | <i>Sphingomonas</i> sp. BHC-A                             | termite                                                                                                                                   | 5                                          | 1    | 0           | 0    | 1               | 0    |                          |            |               | 155,074              | NZ_JDRU000       | JDRU000000 | -        | -     | Xue <i>et al.</i> , 2014        |
| 66                                     | <i>Sphingomonas</i> sp. JGI 0001002-A17                   | Arctic lichen ( <i>Ochrolechia</i> sp.) that grow on rocks                                                                                | 1                                          | 0    | 0           | 0    | 0               | 0    |                          |            |               | 969,519              | NZ_AUOQ000       | AUOQ000000 | -        | -     | -                               |
| 67                                     | <i>Sphingomonas</i> sp. JGI 0001002-C18                   | Arctic lichen ( <i>Umbilicaria</i> sp.) on the Svalbard Islands                                                                           | 0                                          | 0    | 0           | 0    | 0               | 0    |                          |            |               | 590,467              | NZ_ATTZ000       | ATTZ000000 | -        | -     | -                               |
| 68                                     | <i>Sphingomonas</i> sp. JGI 0001002-D21                   | Arctic lichen ( <i>Cetraria</i> sp.) on Svalbard Islands                                                                                  | 0                                          | 1    | 0           | 0    | 0               | 0    |                          |            |               | 4,074,265            | NZ_AUNZ000       | AUNZ000000 | -        | -     | -                               |
| 69                                     | <i>Sphingomonas</i> sp. JGI 0001002-I20                   | termite                                                                                                                                   | 0                                          | 1    | 0           | 0    | 0               | 0    |                          |            |               | 4,878,673            | NZ_AUOQ000       | AUOQ000000 | -        | -     | -                               |
| 70                                     | <i>Sphingomonas</i> sp. JGI 0001003-C6                    | Arctic lichen ( <i>Cetraria</i> sp.) on Svalbard Islands                                                                                  | 0                                          | 0    | 0           | 0    | 0               | 0    |                          |            |               | 3,929,644            | NZ_AUOV000       | AUOV000000 | -        | -     | -                               |
| 71                                     | <i>Sphingomonas</i> sp. JGI 0001003-D23                   | Arctic lichen ( <i>Cetraria</i> sp.) on Svalbard Islands                                                                                  | 1                                          | 1    | 0           | 0    | 1               | 0    |                          |            |               | 4,096,005            | NZ_AUOL000       | AUOL000000 | -        | -     | -                               |
| 72                                     | <i>Sphingomonas</i> sp. JGI 0001003-H15                   | Arctic lichen ( <i>Cetraria</i> sp.) on Svalbard Islands                                                                                  | 0                                          | 0    | 0           | 0    | 2               | 0    |                          |            |               | 4,047,966            | NZ_AUOP000       | AUOP000000 | -        | -     | -                               |
| 73                                     | <i>Sphingomonas</i> sp. KC8                               | Arctic lichen ( <i>Cetraria</i> sp.) on Svalbard Islands                                                                                  | 7                                          | 9    | 0           | 0    | 3               | 0    |                          |            |               | 3,185,459            | NZ_AFMP000       | AFMP000000 | -        | -     | Hu <i>et al.</i> , 2011         |
| 74                                     | <i>Sphingomonas</i> sp. Mn802worker                       | Arctic lichen ( <i>Cetraria</i> sp.) on Svalbard Islands                                                                                  | 3                                          | 2    | 0           | 0    | 2               | 0    |                          |            |               | 4,662,119            | NZ_AORY000       | AORY000000 | -        | -     | Aylward <i>et al.</i> , 2013    |
| 75                                     | <i>Sphingomonas</i> sp. PAMC 26605                        | Arctic lichen ( <i>Cetraria</i> sp.) on Svalbard Islands                                                                                  | 4                                          | 5    | 0           | 0    | 5               | 0    |                          |            |               | 4,663,101            | NZ_AHIS000       | AHIS000000 | -        | -     | Shin <i>et al.</i> , 2012a      |
| 76                                     | <i>Sphingomonas</i> sp. PAMC 26617                        | Arctic lichen ( <i>Cetraria</i> sp.) on Svalbard Islands                                                                                  | 4                                          | 4    | 0           | 0    | 5               | 0    |                          |            |               | 4,769,930            | NZ_AHHA000       | AHHA000000 | -        | -     | Lee <i>et al.</i> , 2012b       |
| 77                                     | <i>Sphingomonas</i> sp. PAMC 26621                        | Arctic lichen ( <i>Cetraria</i> sp.) on Svalbard Islands                                                                                  | 5                                          | 3    | 0           | 0    | 8               | 0    |                          |            |               | 3,920,967            | NZ_AIDW000       | AIDW000000 | -        | -     | Lee <i>et al.</i> , 2012a       |
| 78                                     | <i>Sphingomonas</i> sp. PR090111-T3T-6A                   | Arctic lichen ( <i>Cetraria</i> sp.) on Svalbard Islands                                                                                  | 4                                          | 2    | 0           | 0    | 5               | 0    |                          |            |               | 3,920,099            | NZ_AORL000       | AORL000000 | -        | -     | Aylward <i>et al.</i> , 2013    |
| 79                                     | <i>Sphingomonas</i> sp. URHD0057                          | Arctic lichen ( <i>Cetraria</i> sp.) on Svalbard Islands                                                                                  | 0                                          | 0    | 0           | 0    | 2               | 0    |                          |            |               | 3,910,956            | NZ_JIAU000       | JIAU000000 | -        | -     | -                               |
| 80                                     | <i>Sphingomonas</i> sp. YL-JM2C                           | Arctic lichen ( <i>Cetraria</i> sp.) on Svalbard Islands                                                                                  | 11                                         | 4    | 0           | 0    | 4               | 0    |                          |            |               | 2,784,495            | NZ_ASTM000       | ASTM000000 | -        | -     | -                               |
| 81                                     | <i>Sphingomonas wittichii</i> DP58                        | sea water at Baekryung Island in the Yellow Sea, Korea                                                                                    | 11                                         | 6    | 0           | 1    | 6               | 0    |                          |            |               | 5,628,887            | NZ_JQMC000       | JQMC000000 | -        | -     | Ma <i>et al.</i> , 2012         |
| 82                                     | <i>Sphingomonas</i> -like bacterium B12                   | mutant derived from ATCC 31821 isolated from fermenting cane juice                                                                        | 6                                          | 6    | 0           | 0    | 5               | 0    |                          |            |               | 5,923,019            | NZ_BACX000       | BACX000000 | -        | -     | -                               |
| 83                                     | <i>Sphingopyxis baekryungensis</i> DSM 16222              | mutant derived from ATCC 31821 isolated from fermenting cane juice                                                                        | 3                                          | 4    | 0           | 0    | 1               | 0    |                          |            |               | 3,068,208            | NZ_ATUR000       | ATUR000000 | -        | -     | Yoon <i>et al.</i> , 2005       |
| 84                                     | <i>Zymomonas mobilis</i> subsp. <i>mobilis</i> ATCC 31822 | mutant derived from ATCC 31821 isolated from fermenting cane juice                                                                        | 3                                          | 1    | 0           | 0    | 0               | 0    |                          |            |               | 2,036,394            | NZ_AMSR000       | AMSR000000 | -        | -     | Zhao N <i>et al.</i> , 2012     |
| Total number of the potential homologs |                                                           |                                                                                                                                           | 354                                        | 245  | 14          | 8    | 156             | 4    |                          |            |               |                      |                  |            |          |       |                                 |

The six enzymes identified in strain MBES04 and experimentally validated for their conversion activity of GGGE were used as queries to retrieve protein sequences with sequence similarity in 84 species within the Sphingomonadaceae family and whose genome sequences are available. The full titles of the reference literatures cited in this table are available in supplementary at the Scientific Reports's web site.

**Table S5.** List of possible GGGE-metabolizing genes and their distribution in the genomes of selected isolates

| a                                                | Organism | Reference enzyme | E-value   | Identity % | Similarity % | Start nucleotide position | End nucleotide position | Description                                | Accession number                       | CDS name                               |            |           |
|--------------------------------------------------|----------|------------------|-----------|------------|--------------|---------------------------|-------------------------|--------------------------------------------|----------------------------------------|----------------------------------------|------------|-----------|
| <i>Novosphingobium aromaticivorans</i> DSM 12444 | SDR3     |                  | 2.00E-75  | 47         | 64           | 842319                    | 843251                  | short-chain dehydrogenase/reductase SDR    | ABD25238.1                             | Saro_0793                              |            |           |
|                                                  |          |                  | 5.00E-64  | 44         | 58           | 843248                    | 844180                  | short-chain dehydrogenase/reductase SDR    | ABD25239.1                             | Saro_0794                              |            |           |
|                                                  |          |                  | 3.00E-64  | 43         | 58           | 212005                    | 212925                  | short-chain dehydrogenase/reductase SDR    | ABD24653.1                             | Saro_0205                              |            |           |
|                                                  |          |                  | 7.00E-58  | 43         | 59           | 1976401                   | 1977243                 | short-chain dehydrogenase/reductase SDR    | ABD26315.1                             | Saro_1875                              |            |           |
|                                                  |          |                  | 1.00E-57  | 41         | 57           | 742296                    | 743213                  | short-chain dehydrogenase/reductase SDR    | ABD25150.1                             | Saro_0703                              |            |           |
|                                                  |          |                  | 2.00E-31  | 37         | 55           | 297019                    | 297798                  | short-chain dehydrogenase/reductase SDR    | ABP64526.1                             | Saro_3667                              |            |           |
|                                                  |          |                  | 4.00E-31  | 36         | 52           | 242308                    | 243177                  | short-chain dehydrogenase/reductase SDR    | ABP64479.1                             | Saro_3619                              |            |           |
|                                                  |          |                  | 1.00E-26  | 34         | 53           | 1163430                   | 1164230                 | short-chain dehydrogenase/reductase SDR    | ABD25562.1                             | Saro_1117                              |            |           |
|                                                  |          |                  | 7.00E-26  | 32         | 50           | 279606                    | 280364                  | short-chain dehydrogenase/reductase SDR    | ABP64509.1                             | Saro_3650                              |            |           |
|                                                  |          |                  | 5.00E-24  | 31         | 51           | 73027                     | 73791                   | short-chain dehydrogenase/reductase SDR    | ABP64332.1                             | Saro_3472                              |            |           |
|                                                  |          |                  | 1.00E-21  | 30         | 50           | 1617712                   | 1618485                 | short-chain dehydrogenase/reductase SDR    | ABD26000.1                             | Saro_1560                              |            |           |
|                                                  |          |                  | 3.00E-22  | 30         | 52           | 62816                     | 63553                   | short-chain dehydrogenase/reductase SDR    | ABP64320.1                             | Saro_3460                              |            |           |
|                                                  |          |                  | 5.00E-23  | 30         | 50           | 149323                    | 150084                  | short-chain dehydrogenase/reductase SDR    | ABP64392.1                             | Saro_3532                              |            |           |
|                                                  |          |                  | 3.00E-19  | 29         | 50           | 553249                    | 553995                  | short-chain dehydrogenase/reductase SDR    | ABD24959.1                             | Saro_0512                              |            |           |
|                                                  |          |                  | 7.00E-20  | 28         | 50           | 3428543                   | 3429265                 | 3-oxoacyl-[acyl-carrier-protein] reductase | ABD27647.1                             | Saro_3212                              |            |           |
|                                                  | SDR5     |                  | 1.00E-142 | 80         | 87           | 843248                    | 844180                  | short-chain dehydrogenase/reductase SDR    | ABD25239.1                             | Saro_0794                              |            |           |
|                                                  |          |                  | 3.00E-65  | 49         | 64           | 1976401                   | 1977243                 | short-chain dehydrogenase/reductase SDR    | ABD26315.1                             | Saro_1875                              |            |           |
|                                                  |          |                  | 4.00E-60  | 44         | 61           | 742296                    | 743213                  | short-chain dehydrogenase/reductase SDR    | ABD25150.1                             | Saro_0703                              |            |           |
|                                                  |          |                  | 5.00E-52  | 41         | 58           | 842319                    | 843251                  | short-chain dehydrogenase/reductase SDR    | ABD25238.1                             | Saro_0793                              |            |           |
|                                                  |          |                  | 8.00E-49  | 40         | 57           | 212005                    | 212925                  | short-chain dehydrogenase/reductase SDR    | ABD24653.1                             | Saro_0205                              |            |           |
|                                                  |          |                  | 2.00E-21  | 36         | 51           | 1617712                   | 1618485                 | short-chain dehydrogenase/reductase SDR    | ABD26000.1                             | Saro_1560                              |            |           |
|                                                  |          |                  | 5.00E-28  | 35         | 53           | 242308                    | 243177                  | short-chain dehydrogenase/reductase SDR    | ABP64479.1                             | Saro_3619                              |            |           |
|                                                  |          |                  | 2.00E-23  | 34         | 50           | 297019                    | 297798                  | short-chain dehydrogenase/reductase SDR    | ABP64526.1                             | Saro_3667                              |            |           |
|                                                  |          |                  | 2.00E-19  | 32         | 51           | 1163430                   | 1164230                 | short-chain dehydrogenase/reductase SDR    | ABD25562.1                             | Saro_1117                              |            |           |
|                                                  |          |                  | 8.00E-15  | 28         | 50           | 3134479                   | 3135297                 | short-chain dehydrogenase/reductase SDR    | ABD27351.1                             | Saro_2916                              |            |           |
|                                                  |          | GST3             |           | 3.00E-31   | 37           | 52                        | 2803495                 | 2804361                                    | glutathione S-transferase-like protein | ABD27031.1                             | Saro_2595  |           |
|                                                  |          |                  | GST4      |            | 2.00E-93     | 63                        | 75                      | 2227684                                    | 2228457                                | glutathione S-transferase-like protein | ABD26530.1 | Saro_2091 |
|                                                  |          |                  |           |            | 2.00E-60     | 46                        | 62                      | 3087750                                    | 3088526                                | glutathione S-transferase-like protein | ABD27301.1 | Saro_2865 |
|                                                  |          |                  |           | 2.00E-47   | 35           | 55                        | 3096844                 | 3097614                                    | glutathione S-transferase-like protein | ABD27309.1                             | Saro_2873  |           |
|                                                  |          | GST5             |           | 1.00E-94   | 62           | 72                        | 2573603                 | 2574442                                    | glutathione S-transferase-like protein | ABD26841.1                             | Saro_2405  |           |
| GST6                                             | -        |                  | -         | -          | -            | -                         | -                       | -                                          | -                                      |                                        |            |           |

| b                               | Organism | Reference enzyme | E-value   | Identity % | Similarity % | Start nucleotide position | End nucleotide position | Description                             | Accession number                         | CDS name                       |              |
|---------------------------------|----------|------------------|-----------|------------|--------------|---------------------------|-------------------------|-----------------------------------------|------------------------------------------|--------------------------------|--------------|
| <i>Novosphingobium</i> sp. PP1Y | SDR3     |                  | 1.00E-150 | 83         | 89           | 1241135                   | 1242028                 | short-chain dehydrogenase/reductase SDR | CCA92080.1                               | PP1Y_AT11594                   |              |
|                                 |          |                  | 4.00E-82  | 50         | 65           | 1266094                   | 1266996                 | short-chain dehydrogenase/reductase SDR | CCA92103.1                               | PP1Y_AT11846                   |              |
|                                 |          |                  | 1.00E-64  | 43         | 58           | 1265148                   | 1266083                 | short-chain dehydrogenase/reductase SDR | CCA92102.1                               | PP1Y_AT11837                   |              |
|                                 |          |                  | 4.00E-61  | 39         | 60           | 1251645                   | 1252559                 | short-chain dehydrogenase/reductase SDR | CCA92091.1                               | PP1Y_AT11698                   |              |
|                                 |          |                  | 2.00E-33  | 37         | 52           | 349486                    | 350274                  | short-chain dehydrogenase/reductase SDR | CCA90296.1                               | PP1Y_Mpl3491                   |              |
|                                 |          |                  | 4.00E-36  | 37         | 55           | 1367340                   | 1368152                 | conserved hypothetical protein          | CCA92190.1                               | PP1Y_AT12862                   |              |
|                                 |          |                  | 2.00E-28  | 36         | 51           | 343595                    | 344314                  | short-chain dehydrogenase/reductase SDR | CCA90289.1                               | PP1Y_Mpl3436                   |              |
|                                 |          |                  | 8.00E-26  | 35         | 51           | 921727                    | 922500                  | oxidoreductase                          | CCA90773.1                               | PP1Y_Mpl9257                   |              |
|                                 |          |                  | 4.00E-38  | 35         | 51           | 337025                    | 337873                  | conserved hypothetical protein          | CCA91281.1                               | PP1Y_AT3242                    |              |
|                                 |          |                  | 2.00E-25  | 34         | 51           | 109303                    | 110085                  | short-chain dehydrogenase/reductase SDR | CCA90094.1                               | PP1Y_Mpl1126                   |              |
|                                 |          |                  | 9.00E-24  | 30         | 52           | 552919                    | 553671                  | short-chain dehydrogenase/reductase SDR | CCA90460.1                               | PP1Y_Mpl5490                   |              |
|                                 |          |                  | 2.00E-22  | 30         | 51           | 2340725                   | 2341462                 | short-chain dehydrogenase/reductase SDR | CCA93063.1                               | PP1Y_AT22066                   |              |
|                                 |          |                  | 4.00E-15  | 26         | 50           | 1448106                   | 1448924                 | short-chain dehydrogenase/reductase SDR | CCA92257.1                               | PP1Y_AT13638                   |              |
|                                 |          | SDR5             |           | 1.00E-150  | 82           | 90                        | 1265148                 | 1266083                                 | short-chain dehydrogenase/reductase SDR  | CCA92102.1                     | PP1Y_AT11837 |
|                                 |          |                  |           | 2.00E-60   | 49           | 61                        | 1241135                 | 1242028                                 | short-chain dehydrogenase/reductase SDR  | CCA92080.1                     | PP1Y_AT11594 |
|                                 |          |                  | 5.00E-57  | 42         | 60           | 1251645                   | 1252559                 | short-chain dehydrogenase/reductase SDR | CCA92091.1                               | PP1Y_AT11698                   |              |
|                                 |          |                  | 6.00E-52  | 42         | 60           | 1266094                   | 1266996                 | short-chain dehydrogenase/reductase SDR | CCA92103.1                               | PP1Y_AT11846                   |              |
|                                 |          |                  | 2.00E-23  | 41         | 51           | 921727                    | 922500                  | oxidoreductase                          | CCA90773.1                               | PP1Y_Mpl9257                   |              |
|                                 |          |                  | 5.00E-25  | 37         | 54           | 349486                    | 350274                  | short-chain dehydrogenase/reductase SDR | CCA90296.1                               | PP1Y_Mpl3491                   |              |
|                                 |          |                  | 8.00E-23  | 33         | 52           | 552919                    | 553671                  | short-chain dehydrogenase/reductase SDR | CCA90460.1                               | PP1Y_Mpl5490                   |              |
|                                 | GST3     |                  |           | 1.00E-102  | 80           | 86                        | 1246742                 | 1247413                                 | glutathione S-transferase                | CCA92086.1                     | PP1Y_AT11650 |
|                                 |          |                  |           | 1.00E-34   | 38           | 56                        | 1235263                 | 1236030                                 | glutathione S-transferase-like           | CCA92074.1                     | PP1Y_AT11532 |
|                                 |          |                  | GST4      |            | 1.00E-129    | 85                        | 92                      | 1247655                                 | 1248407                                  | glutathione S-transferase-like | CCA92087.1   |
|                                 |          |                  |           | 1.00E-48   | 36           | 55                        | 1235263                 | 1236030                                 | glutathione S-transferase-like           | CCA92074.1                     | PP1Y_AT11532 |
|                                 | GST5     |                  |           |            | 1.00E-140    | 86                        | 90                      | 1248451                                 | 1249272                                  | glutathione S-transferase-like | CCA92088.1   |
|                                 |          |                  | GST6      | 1.00E-122  | 79           | 87                        | 1249286                 | 1250119                                 | glutathione S-transferase family protein | CCA92089.1                     | PP1Y_AT11674 |

| c                            | Organism | Reference enzyme | E-value  | Identity % | Similarity % | Start nucleotide position | End nucleotide position | Description             | Accession number | CDS name  |
|------------------------------|----------|------------------|----------|------------|--------------|---------------------------|-------------------------|-------------------------|------------------|-----------|
| <i>Sphingobium</i> sp. SYK-6 | SDR3     |                  | 3.00E-93 | 57         | 70           | 3867577                   | 3868470                 | C alpha-dehydrogenase   | BAK68263.1       | SLG_35880 |
|                              |          |                  | 6.00E-65 | 44         | 59           | 920073                    | 920990                  | C alpha-dehydrogenase   | BAK65539.1       | SLG_08640 |
|                              |          |                  | 2.00E-53 | 40         | 57           | 756721                    | 757554                  | putative oxidoreductase | BAK65399.1       | SLG_07240 |
|                              |          |                  | 2.00E-54 | 39         | 57           | 3635618                   | 3636487                 | C alpha-dehydrogenase   | BAK68041.1       | SLG_33660 |
|                              |          |                  | 8.00E-58 | 38         | 57           | 1377047                   | 1377961                 | putative oxidoreductase | BAK65939.1       | SLG_12640 |
|                              |          |                  | 3.00E-50 | 38         | 53           | 3066706                   | 3067590                 | putative oxidoreductase | BAK67509.1       | SLG_28340 |
|                              |          |                  | 5.00E-54 | 38         | 54           | 3872346                   | 3873281                 | C alpha-dehydrogenase   | BAK68265.1       | SLG_35900 |
|                              | SDR5     |                  | 3.00E-53 | 46         | 60           | 756721                    | 757554                  | putative oxidoreductase | BAK65399.1       | SLG_07240 |
|                              |          |                  | 2.00E-58 | 45         | 59           | 3867577                   | 3868470                 | C alpha-dehydrogenase   | BAK68263.1       | SLG_35880 |
|                              |          |                  | 4.00E-58 | 45         | 57           | 3872346                   | 3873281                 | C alpha-dehydrogenase   | BAK68265.1       | SLG_35900 |
|                              |          |                  | 4.00E-52 | 42         | 56           | 1377047                   | 1377961                 | putative oxidoreductase | BAK65939.1       | SLG_12640 |
|                              |          |                  | 1.00E-52 | 42         | 55           | 3066706                   | 3067590                 | putative oxidoreductase | BAK67509.1       | SLG_28340 |
|                              |          |                  | 2.00E-50 | 40         | 57           | 3635618                   | 3636487                 | C alpha-dehydrogenase   | BAK68041.1       | SLG_33660 |
|                              |          |                  | 3.00E-46 | 38         | 57           | 920073                    | 920990                  | C alpha-dehydrogenase   | BAK65539.1       | SLG_08640 |

|  |      |           |    |    |         |         |                                         |            |           |
|--|------|-----------|----|----|---------|---------|-----------------------------------------|------------|-----------|
|  |      | 1.00E-22  | 34 | 53 | 3014885 | 3015685 | short-chain dehydrogenase/reductase SDR | BAK67470.1 | SLG_27950 |
|  |      | 8.00E-24  | 34 | 51 | 3597576 | 3598301 | SDR-family protein                      | BAK68006.1 | SLG_33310 |
|  | GST3 | 2.00E-33  | 39 | 55 | 421704  | 422603  | glutathione S-transferase               | BAK65087.1 | SLG_04120 |
|  | GST4 | 6.00E-98  | 68 | 78 | 921070  | 921843  | beta-etherase                           | BAK65540.1 | SLG_08650 |
|  | GST4 | 1.00E-54  | 42 | 59 | 755869  | 786615  | glutathione S-transferase               | BAK65398.1 | SLG_07230 |
|  | GST5 | 1.00E-122 | 80 | 87 | 921965  | 922810  | beta-etherase                           | BAK65541.1 | SLG_08660 |
|  | GST5 | 1.00E-104 | 67 | 80 | 3523525 | 3524370 | beta-etherase                           | BAK67935.1 | SLG_32600 |
|  | GST6 | 2.00E-96  | 65 | 78 | 922888  | 923685  | glutathione S-transferase               | BAK65542.1 | SLG_08670 |

**d**

| Organism                          | Reference enzyme | E-value  | Identity % | Similarity % | Start nucleotide position | End nucleotide position                      | Description                                  | Accession number | CDS name  |
|-----------------------------------|------------------|----------|------------|--------------|---------------------------|----------------------------------------------|----------------------------------------------|------------------|-----------|
| <i>Sphingomonas wittichii</i> RW1 | SDR3             | 1.00E-51 | 39         | 54           | 401363                    | 402232                                       | short-chain dehydrogenase/reductase SDR      | ABQ66748.1       | Swit_0378 |
|                                   |                  | 9.00E-26 | 36         | 53           | 3623724                   | 3624473                                      | short-chain dehydrogenase/reductase SDR      | ABQ69640.1       | Swit_3294 |
|                                   |                  | 1.00E-22 | 35         | 51           | 357327                    | 358085                                       | short-chain dehydrogenase/reductase SDR      | ABQ66706.1       | Swit_0335 |
|                                   |                  | 3.00E-24 | 35         | 50           | 2219321                   | 2220061                                      | short-chain dehydrogenase/reductase SDR      | ABQ68341.1       | Swit_1981 |
|                                   |                  | 3.00E-27 | 34         | 50           | 1107907                   | 1108656                                      | short-chain dehydrogenase/reductase SDR      | ABQ67363.1       | Swit_0996 |
|                                   |                  | 2.00E-26 | 34         | 50           | 3377667                   | 3378434                                      | short-chain dehydrogenase/reductase SDR      | ABQ69428.1       | Swit_3078 |
|                                   |                  | 2.00E-24 | 33         | 51           | 322843                    | 323589                                       | short-chain dehydrogenase/reductase SDR      | ABQ66676.1       | Swit_0305 |
|                                   |                  | 1.00E-24 | 33         | 52           | 1163837                   | 1164631                                      | short-chain dehydrogenase/reductase SDR      | ABQ67411.1       | Swit_1045 |
|                                   |                  | 3.00E-24 | 32         | 51           | 3618469                   | 3619263                                      | short-chain dehydrogenase/reductase SDR      | ABQ69634.1       | Swit_3288 |
|                                   |                  | 2.00E-22 | 31         | 50           | 5053768                   | 5054490                                      | 3-oxoacyl-[acyl-carrier-protein] reductase   | ABQ70937.1       | Swit_4599 |
|                                   |                  | 7.00E-20 | 30         | 50           | 2513622                   | 2514392                                      | short-chain dehydrogenase/reductase SDR      | ABQ68618.1       | Swit_2259 |
|                                   |                  | 2.00E-19 | 28         | 50           | 1033586                   | 1034305                                      | short-chain dehydrogenase/reductase SDR      | ABQ67296.1       | Swit_0929 |
|                                   |                  | 5.00E-38 | 38         | 51           | 401363                    | 402232                                       | short-chain dehydrogenase/reductase SDR      | ABQ66748.1       | Swit_0378 |
|                                   |                  | 2.00E-24 | 36         | 53           | 1107907                   | 1108656                                      | short-chain dehydrogenase/reductase SDR      | ABQ67363.1       | Swit_0996 |
|                                   |                  | 2.00E-20 | 36         | 50           | 3623724                   | 3624473                                      | short-chain dehydrogenase/reductase SDR      | ABQ69640.1       | Swit_3294 |
|                                   | 3.00E-21         | 35       | 51         | 1163837      | 1164631                   | short-chain dehydrogenase/reductase SDR      | ABQ67411.1                                   | Swit_1045        |           |
|                                   | 3.00E-26         | 34       | 51         | 1122273      | 1123010                   | short-chain dehydrogenase/reductase SDR      | ABQ67374.1                                   | Swit_1007        |           |
|                                   | 3.00E-21         | 33       | 50         | 2513622      | 2514392                   | short-chain dehydrogenase/reductase SDR      | ABQ68618.1                                   | Swit_2259        |           |
|                                   | SDR5             | -        | -          | -            | -                         | -                                            | -                                            | -                | -         |
|                                   | GST3             | 9.00E-50 | 45         | 64           | 3794267                   | 3794965                                      | Glutathione S-transferase, N-terminal domain | ABQ69803.1       | Swit_3457 |
| 8.00E-43                          |                  | 45       | 60         | 4580162      | 4580845                   | Glutathione S-transferase, N-terminal domain | ABQ70503.1                                   | Swit_4163        |           |
| 3.00E-36                          |                  | 40       | 58         | 240932       | 241636                    | Glutathione S-transferase, N-terminal domain | ABQ66605.1                                   | Swit_0234        |           |
| 1.00E-37                          |                  | 39       | 55         | 1850550      | 1851272                   | Glutathione S-transferase, N-terminal domain | ABQ68027.1                                   | Swit_1664        |           |
| GST4                              | -                | -        | -          | -            | -                         | -                                            | -                                            | -                |           |
| GST5                              | 1.00E-49         | 41       | 59         | 1837745      | 1838458                   | hypothetical protein                         | ABQ68015.1                                   | Swit_1652        |           |
| GST6                              | -                | -        | -          | -            | -                         | -                                            | -                                            | -                |           |

**e**

| Organism                                     | Reference enzyme | E-value   | Identity % | Similarity % | Start nucleotide position | End nucleotide position | Description                                                                                       | Accession number               |
|----------------------------------------------|------------------|-----------|------------|--------------|---------------------------|-------------------------|---------------------------------------------------------------------------------------------------|--------------------------------|
| <i>Novosphingobium acidiphilum</i> DSM 19966 | SDR3             | 3.00E-79  | 47         | 63           | 10570                     | 11424                   | Novosphingobium acidiphilum DSM 19966 G404DRAFT_scaffold00015.15_C, whole genome shotgun sequence | gi 523617949 gb AUBA01000015.1 |
|                                              |                  | 2.00E-64  | 45         | 59           | 9641                      | 10396                   | Novosphingobium acidiphilum DSM 19966 G404DRAFT_scaffold00015.15_C, whole genome shotgun sequence | gi 523617949 gb AUBA01000015.1 |
|                                              |                  | 2.00E-25  | 32         | 50           | 37864                     | 38412                   | Novosphingobium acidiphilum DSM 19966 G404DRAFT_scaffold00001.1_C, whole genome shotgun sequence  | gi 523617984 gb AUBA01000001.1 |
|                                              | SDR5             | 1.00E-156 | 78         | 86           | 9641                      | 10552                   | Novosphingobium acidiphilum DSM 19966 G404DRAFT_scaffold00015.15_C, whole genome shotgun sequence | gi 523617949 gb AUBA01000015.1 |
|                                              |                  | 2.00E-58  | 40         | 60           | 10570                     | 11340                   | Novosphingobium acidiphilum DSM 19966 G404DRAFT_scaffold00015.15_C, whole genome shotgun sequence | gi 523617949 gb AUBA01000015.1 |
|                                              |                  | 7.00E-22  | 31         | 51           | 12929                     | 13510                   | Novosphingobium acidiphilum DSM 19966 G404DRAFT_scaffold00026.26_C, whole genome shotgun sequence | gi 523617931 gb AUBA01000026.1 |
|                                              | GST3             | 5.00E-34  | 38         | 55           | 94121                     | 94711                   | Novosphingobium acidiphilum DSM 19966 G404DRAFT_scaffold00002.2_C, whole genome shotgun sequence  | gi 523617981 gb AUBA01000002.1 |
|                                              | GST4             | 9.00E-62  | 46         | 62           | 15767                     | 16471                   | Novosphingobium acidiphilum DSM 19966 G404DRAFT_scaffold00015.15_C, whole genome shotgun sequence | gi 523617949 gb AUBA01000015.1 |
|                                              | GST5             | 1.00E-114 | 66         | 77           | 35456                     | 36196                   | Novosphingobium acidiphilum DSM 19966 G404DRAFT_scaffold00015.15_C, whole genome shotgun sequence | gi 523617949 gb AUBA01000015.1 |
|                                              | GST6             | -         | -          | -            | -                         | -                       | -                                                                                                 | -                              |

**f**

| Organism                       | Reference enzyme | E-value   | Identity % | Similarity % | Start nucleotide position | End nucleotide position | Description                                                          | Accession number               |
|--------------------------------|------------------|-----------|------------|--------------|---------------------------|-------------------------|----------------------------------------------------------------------|--------------------------------|
| <i>Novosphingobium</i> sp. B-7 | SDR3             | 2.00E-82  | 47         | 64           | 4707                      | 5561                    | Novosphingobium sp. B-7 scaffold199_4, whole genome shotgun sequence | gi 510886133 gb APCQ01000291.1 |
|                                |                  | 1.00E-67  | 42         | 58           | 5642                      | 6502                    | Novosphingobium sp. B-7 scaffold199_4, whole genome shotgun sequence | gi 510886133 gb APCQ01000291.1 |
|                                |                  | 4.00E-23  | 30         | 52           | 2835                      | 3389                    | Novosphingobium sp. B-7 scaffold82_3, whole genome shotgun sequence  | gi 510885593 gb APCQ01000527.1 |
|                                | SDR5             | 1.00E-166 | 82         | 89           | 5573                      | 6502                    | Novosphingobium sp. B-7 scaffold199_4, whole genome shotgun sequence | gi 510886133 gb APCQ01000291.1 |
|                                |                  | 4.00E-58  | 40         | 59           | 4797                      | 5561                    | Novosphingobium sp. B-7 scaffold199_4, whole genome shotgun sequence | gi 510886133 gb APCQ01000291.1 |

|  |      |           |    |    |       |       |                                                                      |                                |
|--|------|-----------|----|----|-------|-------|----------------------------------------------------------------------|--------------------------------|
|  |      | 3.00E-55  | 39 | 56 | 12913 | 13707 | Novosphingobium sp. B-7 scaffold250_2, whole genome shotgun sequence | gi 510885447 gb APCQ01000574.1 |
|  | GST3 | 2.00E-37  | 39 | 54 | 29589 | 30185 | Novosphingobium sp. B-7 scaffold246_2, whole genome shotgun sequence | gi 510886366 gb APCQ01000145.1 |
|  | GST4 | 1.00E-105 | 65 | 75 | 2367  | 3068  | Novosphingobium sp. B-7 scaffold429_1, whole genome shotgun sequence | gi 510884874 gb APCQ01000703.1 |
|  |      | 4.00E-70  | 50 | 65 | 429   | 1127  | Novosphingobium sp. B-7 scaffold301_2, whole genome shotgun sequence | gi 510885331 gb APCQ01000596.1 |
|  | GST5 | 1.00E-111 | 64 | 72 | 1181  | 1933  | Novosphingobium sp. B-7 scaffold190_1, whole genome shotgun sequence | gi 510886110 gb APCQ01000314.1 |
|  | GST6 | -         | -  | -  | -     | -     | -                                                                    | -                              |

g

| Organism                                  | Reference enzyme | E-value   | Identity % | Similarity % | Start nucleotide position | End nucleotide position | Description                                                                                | Accession number                 |
|-------------------------------------------|------------------|-----------|------------|--------------|---------------------------|-------------------------|--------------------------------------------------------------------------------------------|----------------------------------|
| <i>Sphingobium xenophagum</i> NBRC 107872 | SDR3             | 4.00E-74  | 44         | 61           | 136070                    | 136906                  | Sphingobium xenophagum NBRC 107872 DNA, contig: contig00601, whole genome shotgun sequence | gi 478730563 dbj BAR E01000011.1 |
|                                           |                  | 8.00E-59  | 39         | 56           | 156034                    | 156834                  | Sphingobium xenophagum NBRC 107872 DNA, contig: contig00601, whole genome shotgun sequence | gi 478730563 dbj BAR E01000011.1 |
|                                           |                  | 3.00E-45  | 34         | 50           | 161554                    | 162399                  | Sphingobium xenophagum NBRC 107872 DNA, contig: contig00301, whole genome shotgun sequence | gi 478730568 dbj BAR E01000006.1 |
|                                           |                  | 2.00E-28  | 34         | 53           | 162438                    | 163007                  | Sphingobium xenophagum NBRC 107872 DNA, contig: contig00301, whole genome shotgun sequence | gi 478730568 dbj BAR E01000006.1 |
|                                           | SDR5             | 2.00E-85  | 52         | 66           | 155941                    | 156834                  | Sphingobium xenophagum NBRC 107872 DNA, contig: contig00601, whole genome shotgun sequence | gi 478730563 dbj BAR E01000011.1 |
|                                           |                  | 4.00E-54  | 42         | 57           | 136154                    | 136906                  | Sphingobium xenophagum NBRC 107872 DNA, contig: contig00601, whole genome shotgun sequence | gi 478730563 dbj BAR E01000011.1 |
|                                           |                  | 1.00E-46  | 36         | 51           | 161554                    | 162357                  | Sphingobium xenophagum NBRC 107872 DNA, contig: contig00301, whole genome shotgun sequence | gi 478730568 dbj BAR E01000006.1 |
|                                           | GST3             | 1.00E-100 | 70         | 82           | 168887                    | 169501                  | Sphingobium xenophagum NBRC 107872 DNA, contig: contig00601, whole genome shotgun sequence | gi 478730563 dbj BAR E01000011.1 |
|                                           |                  | 1.00E-38  | 41         | 55           | 174384                    | 174977                  | Sphingobium xenophagum NBRC 107872 DNA, contig: contig00201, whole genome shotgun sequence | gi 478730572 dbj BAR E01000002.1 |
|                                           | GST4             | 1.00E-142 | 84         | 91           | 169791                    | 170522                  | Sphingobium xenophagum NBRC 107872 DNA, contig: contig00601, whole genome shotgun sequence | gi 478730563 dbj BAR E01000011.1 |
|                                           |                  | 1.00E-55  | 39         | 56           | 148241                    | 148990                  | Sphingobium xenophagum NBRC 107872 DNA, contig: contig00601, whole genome shotgun sequence | gi 478730563 dbj BAR E01000011.1 |
|                                           | GST5             | -         | -          | -            | -                         | -                       | -                                                                                          | -                                |
|                                           | GST6             | 1.00E-146 | 80         | 89           | 170588                    | 171361                  | Sphingobium xenophagum NBRC 107872 DNA, contig: contig00601, whole genome shotgun sequence | gi 478730563 dbj BAR E01000011.1 |

h

| Organism                          | Reference enzyme | E-value   | Identity % | Similarity % | Start nucleotide position | End nucleotide position | Description                                                         | Accession number               |
|-----------------------------------|------------------|-----------|------------|--------------|---------------------------|-------------------------|---------------------------------------------------------------------|--------------------------------|
| <i>Sphingobium xenophagum</i> QYY | SDR3             | 5.00E-75  | 44         | 61           | 19330                     | 20166                   | Sphingobium xenophagum QYY contig058, whole genome shotgun sequence | gi 394703557 gb AKIB01000058.1 |
|                                   |                  | 1.00E-58  | 39         | 56           | 42865                     | 43665                   | Sphingobium xenophagum QYY contig026, whole genome shotgun sequence | gi 394703625 gb AKIB01000026.1 |
|                                   |                  | 4.00E-28  | 34         | 52           | 45104                     | 45673                   | Sphingobium xenophagum QYY contig014, whole genome shotgun sequence | gi 394703648 gb AKIB01000014.1 |
|                                   |                  | 2.00E-44  | 34         | 50           | 45712                     | 46557                   | Sphingobium xenophagum QYY contig014, whole genome shotgun sequence | gi 394703648 gb AKIB01000014.1 |
|                                   | SDR5             | 8.00E-87  | 52         | 66           | 42865                     | 43758                   | Sphingobium xenophagum QYY contig026, whole genome shotgun sequence | gi 394703625 gb AKIB01000026.1 |
|                                   |                  | 4.00E-55  | 42         | 57           | 19414                     | 20166                   | Sphingobium xenophagum QYY contig058, whole genome shotgun sequence | gi 394703557 gb AKIB01000058.1 |
|                                   |                  | 6.00E-45  | 35         | 50           | 45754                     | 46557                   | Sphingobium xenophagum QYY contig014, whole genome shotgun sequence | gi 394703648 gb AKIB01000014.1 |
|                                   | GST3             | 1.00E-102 | 71         | 82           | 30197                     | 30811                   | Sphingobium xenophagum QYY contig026, whole genome shotgun sequence | gi 394703625 gb AKIB01000026.1 |
|                                   |                  | 3.00E-39  | 41         | 55           | 40752                     | 41345                   | Sphingobium xenophagum QYY contig104, whole genome shotgun sequence | gi 394703460 gb AKIB01000104.1 |
|                                   | GST4             | 1.00E-142 | 84         | 91           | 29176                     | 29907                   | Sphingobium xenophagum QYY contig026, whole genome shotgun sequence | gi 394703625 gb AKIB01000026.1 |
|                                   |                  | 2.00E-56  | 39         | 56           | 52018                     | 52767                   | Sphingobium xenophagum QYY contig026, whole genome shotgun sequence | gi 394703625 gb AKIB01000026.1 |
|                                   | GST5             | -         | -          | -            | -                         | -                       | -                                                                   | -                              |
|                                   | GST6             | 1.00E-145 | 79         | 87           | 28337                     | 29110                   | Sphingobium xenophagum QYY contig026, whole genome shotgun sequence | gi 394703625 gb AKIB01000026.1 |

I

| Organism                           | Reference enzyme | E-value  | Identity % | Similarity % | Start nucleotide position | End nucleotide position                                                 | Description                                                             | Accession number               |
|------------------------------------|------------------|----------|------------|--------------|---------------------------|-------------------------------------------------------------------------|-------------------------------------------------------------------------|--------------------------------|
| <i>Sphingomonas wittichii</i> DP58 | SDR3             | 2.00E-56 | 40         | 56           | 10050                     | 10868                                                                   | Sphingomonas wittichii DP58 contig000142, whole genome shotgun sequence | gi 375076127 gb AHK001000141.1 |
|                                    |                  | 9.00E-29 | 36         | 53           | 13298                     | 13864                                                                   | Sphingomonas wittichii DP58 contig000592, whole genome shotgun sequence | gi 375075677 gb AHK001000591.1 |
|                                    |                  | 6.00E-25 | 35         | 52           | 15110                     | 15679                                                                   | Sphingomonas wittichii DP58 contig000144, whole genome shotgun sequence | gi 375076125 gb AHK001000143.1 |
|                                    |                  | 3.00E-28 | 34         | 51           | 16302                     | 16889                                                                   | Sphingomonas wittichii DP58 contig000153, whole genome shotgun sequence | gi 375076116 gb AHK001000152.1 |
|                                    |                  | 3.00E-25 | 33         | 50           | 6855                      | 7415                                                                    | Sphingomonas wittichii DP58 contig000681, whole genome shotgun sequence | gi 375075588 gb AHK001000680.1 |
|                                    |                  | 1.00E-25 | 33         | 51           | 6427                      | 7005                                                                    | Sphingomonas wittichii DP58 contig000454, whole genome shotgun sequence | gi 375075815 gb AHK001000453.1 |
|                                    |                  | 3.00E-26 | 32         | 51           | 7855                      | 8454                                                                    | Sphingomonas wittichii DP58 contig000592, whole genome shotgun sequence | gi 375075677 gb AHK001000591.1 |
|                                    |                  | 8.00E-25 | 31         | 50           | 24320                     | 24886                                                                   | Sphingomonas wittichii DP58 contig000497, whole genome shotgun sequence | gi 375075772 gb AHK001000496.1 |
|                                    |                  | 6.00E-21 | 28         | 50           | 10335                     | 10895                                                                   | Sphingomonas wittichii DP58 contig000404, whole genome shotgun sequence | gi 375075865 gb AHK001000403.1 |
|                                    |                  | 1.00E-30 | 28         | 50           | 18969                     | 19556                                                                   | Sphingomonas wittichii DP58 contig000235, whole genome shotgun sequence | gi 375076034 gb AHK001000234.1 |
|                                    | 2.00E-21         | 28       | 50         | 12802        | 13341                     | Sphingomonas wittichii DP58 contig000623, whole genome shotgun sequence | gi 375075646 gb AHK001000622.1                                          |                                |
|                                    | SDR5             | 1.00E-27 | 38         | 50           | 4043                      | 4603                                                                    | Sphingomonas wittichii DP58 contig000456, whole genome shotgun sequence | gi 375075813 gb AHK001000455.1 |
|                                    |                  | 4.00E-45 | 38         | 51           | 10077                     | 10862                                                                   | Sphingomonas wittichii DP58 contig000142, whole genome shotgun sequence | gi 375076127 gb AHK001000141.1 |
|                                    |                  | 9.00E-28 | 37         | 50           | 13268                     | 13864                                                                   | Sphingomonas wittichii DP58 contig000592, whole genome shotgun sequence | gi 375075677 gb AHK001000591.1 |
|                                    |                  | 1.00E-28 | 34         | 51           | 27331                     | 27897                                                                   | Sphingomonas wittichii DP58 contig000456, whole genome shotgun sequence | gi 375075813 gb AHK001000455.1 |
|                                    |                  | 3.00E-23 | 31         | 52           | 1603                      | 2181                                                                    | Sphingomonas wittichii DP58 contig000206, whole genome shotgun sequence | gi 375076063 gb AHK001000205.1 |
|                                    |                  | 6.00E-19 | 27         | 50           | 2956                      | 3543                                                                    | Sphingomonas wittichii DP58 contig000581, whole genome shotgun sequence | gi 375075688 gb AHK001000580.1 |
|                                    | GST3             | 6.00E-47 | 45         | 60           | 4974                      | 5510                                                                    | Sphingomonas wittichii DP58 contig000553, whole genome shotgun sequence | gi 375075716 gb AHK001000552.1 |
|                                    |                  | 1.00E-55 | 45         | 64           | 265                       | 831                                                                     | Sphingomonas wittichii DP58 contig000196, whole genome shotgun sequence | gi 375076073 gb AHK001000195.1 |
|                                    |                  | 2.00E-39 | 40         | 58           | 5426                      | 6013                                                                    | Sphingomonas wittichii DP58 contig000288, whole genome shotgun sequence | gi 375075981 gb AHK001000287.1 |
|                                    |                  | 1.00E-37 | 40         | 54           | 4390                      | 4947                                                                    | Sphingomonas wittichii DP58 contig000027, whole genome shotgun sequence | gi 375076241 gb AHK001000027.1 |
|                                    |                  | 5.00E-35 | 39         | 57           | 8                         | 547                                                                     | Sphingomonas wittichii DP58 contig000565, whole genome shotgun sequence | gi 375075704 gb AHK001000564.1 |
|                                    |                  | 4.00E-25 | 29         | 50           | 4465                      | 5001                                                                    | Sphingomonas wittichii DP58 contig000031, whole genome shotgun sequence | gi 375076237 gb AHK001000031.1 |
|                                    | GST4             | -        | -          | -            | -                         | -                                                                       | -                                                                       | -                              |
|                                    | GST5             | 8.00E-54 | 38         | 55           | 134                       | 892                                                                     | Sphingomonas wittichii DP58 contig000567, whole genome shotgun sequence | gi 375075702 gb AHK001000566.1 |
|                                    | GST6             | -        | -          | -            | -                         | -                                                                       | -                                                                       | -                              |

Similarity between GGGE-converting enzymes from strain MBES04 and homologous proteins of selected species and their chromosomal locations or available contigs are shown.

-.: Not detected

**Table S6.** Differentially expressed genes in response to GGGE and MPPHV in whole-genome transcriptional profiling

**a** Upregulated genes in response to GGGE

| Gene ID  | Putative function                                         | Fold change | a.value <sup>(1)</sup> | m.value <sup>(2)</sup> | p.value | q.value | KO entry <sup>(3)</sup> | KEGG pathway or Definition                                                                                                                                                                                                        |
|----------|-----------------------------------------------------------|-------------|------------------------|------------------------|---------|---------|-------------------------|-----------------------------------------------------------------------------------------------------------------------------------------------------------------------------------------------------------------------------------|
| GAM03020 | hypothetical protein                                      | 2.0         | 9.3E+00                | 1.0E+00                | 9.4E-07 | 3.0E-04 | -                       | - <sup>(4)</sup>                                                                                                                                                                                                                  |
| GAM03021 | outer membrane protein                                    | 2.8         | 1.3E+01                | 1.5E+00                | 5.5E-15 | 1.3E-11 | K18139                  | β-lactam resistance                                                                                                                                                                                                               |
| GAM03022 | hydrophobe/amphiphile efflux-1 (HAE1) family transporter  | 2.7         | 1.4E+01                | 1.4E+00                | 9.9E-14 | 1.5E-10 | K03296                  | hydrophobic/amphiphilic exporter-1 (mainly G-bacteria), HAE1 family                                                                                                                                                               |
| GAM03023 | membrane fusion protein                                   | 2.6         | 1.2E+01                | 1.4E+00                | 3.3E-13 | 3.1E-10 | K03585                  | β-lactam resistance                                                                                                                                                                                                               |
| GAM03024 | TetR family transcriptional regulator                     | 1.8         | 1.0E+01                | 8.8E-01                | 9.0E-06 | 2.2E-03 | -                       | -                                                                                                                                                                                                                                 |
| GAM03455 | hypothetical protein                                      | 6.0         | 7.4E+00                | 2.6E+00                | 7.6E-24 | 3.6E-20 | -                       | -                                                                                                                                                                                                                                 |
| GAM03456 | <i>p</i> -cresol methylhydroxylase subunit                | 2.9         | 9.0E+00                | 1.5E+00                | 4.6E-13 | 3.6E-10 | K05797                  | toluene degradation                                                                                                                                                                                                               |
| GAM03457 | <i>p</i> -cresol methylhydroxylase subunit                | 2.6         | 6.4E+00                | 1.4E+00                | 3.8E-06 | 1.1E-03 | -                       | toluene degradation                                                                                                                                                                                                               |
| GAM03580 | cation efflux protein                                     | 3.6         | 4.8E+00                | 1.9E+00                | 4.3E-05 | 7.4E-03 | -                       | -                                                                                                                                                                                                                                 |
| GAM03631 | acyl-CoA dehydrogenase                                    | 1.8         | 1.1E+01                | 8.3E-01                | 1.9E-05 | 4.0E-03 | -                       | -                                                                                                                                                                                                                                 |
| GAM03632 | 3-hydroxyacyl-CoA dehydrogenase                           | 1.9         | 1.2E+01                | 9.3E-01                | 1.3E-06 | 3.8E-04 | K07516                  | fatty acid degradation/carbon fixation pathways in prokaryotes/carbon metabolism/fatty acid metabolism                                                                                                                            |
| GAM03633 | acetyl-CoA acyltransferase                                | 1.7         | 1.1E+01                | 8.1E-01                | 3.1E-05 | 5.9E-03 | K00632                  | fatty acid degradation/valine, leucine and isoleucine degradation/geraniol degradation (metabolism of terpenoids and polyketides)/benzoate degradation/a-linolenic acid metabolism/ethylbenzene degradation/fatty acid metabolism |
| GAM03896 | calcium-binding protein                                   | 2.3         | 8.6E+00                | 1.2E+00                | 3.0E-08 | 1.2E-05 | -                       | -                                                                                                                                                                                                                                 |
| GAM04082 | hypothetical conserved protein                            | 2.5         | 8.4E+00                | 1.3E+00                | 3.4E-09 | 1.6E-06 | -                       | -                                                                                                                                                                                                                                 |
| GAM04083 | hypothetical protein                                      | 2.6         | 8.9E+00                | 1.4E+00                | 4.4E-11 | 2.6E-08 | -                       | -                                                                                                                                                                                                                                 |
| GAM04124 | 2-keto-4-pentenoate hydratase                             | 1.7         | 9.9E+00                | 7.3E-01                | 2.5E-04 | 3.7E-02 | K02554                  | phenylalanine metabolism/benzoate degradation/dioxin degradation/xylene degradation/degradation of aromatic compounds                                                                                                             |
| GAM04237 | Malate:quinone oxidoreductase                             | 2.0         | 8.0E+00                | 1.0E+00                | 1.3E-05 | 2.8E-03 | K00116                  | citrate cycle/pyruvate metabolism/carbon metabolism                                                                                                                                                                               |
| GAM04562 | PadR family transcriptional regulator                     | 1.7         | 1.2E+01                | 7.8E-01                | 3.6E-05 | 6.5E-03 | K10947                  | PadR family transcriptional regulator, regulatory protein PadR                                                                                                                                                                    |
| GAM04568 | hypothetical conserved protein                            | 1.8         | 9.0E+00                | 8.5E-01                | 5.1E-05 | 8.6E-03 | -                       | -                                                                                                                                                                                                                                 |
| GAM04702 | hypothetical protein                                      | 1.6         | 9.6E+00                | 7.2E-01                | 3.5E-04 | 5.0E-02 | -                       | -                                                                                                                                                                                                                                 |
| GAM04949 | two component LuxR family transcriptional regulator       | 1.9         | 7.2E+00                | 9.5E-01                | 2.1E-04 | 3.3E-02 | -                       | -                                                                                                                                                                                                                                 |
| GAM05027 | FAD dependent oxidoreductase                              | 2.1         | 8.4E+00                | 1.1E+00                | 7.7E-07 | 2.6E-04 | K00111                  | glycerophospholipid metabolism                                                                                                                                                                                                    |
| GAM05028 | major facilitator superfamily glycerol uptake transporter | 2.2         | 8.2E+00                | 1.1E+00                | 5.8E-07 | 2.1E-04 | K02440                  | glycerol uptake facilitator protein                                                                                                                                                                                               |
| GAM05030 | glycerol kinase                                           | 1.8         | 8.9E+00                | 8.8E-01                | 3.1E-05 | 5.9E-03 | K00864                  | glycerolipid metabolism/PPAR signaling pathway/plant-pathogen interaction                                                                                                                                                         |
| GAM05137 | CopG family transcriptional regulator                     | 1.7         | 9.3E+00                | 7.4E-01                | 2.7E-04 | 4.0E-02 | K07722                  | CopG family transcriptional regulator, nickel-responsive regulator                                                                                                                                                                |
| GAM06305 | hypothetical conserved protein                            | 2.6         | 8.8E+00                | 1.4E+00                | 1.9E-10 | 1.0E-07 | -                       | -                                                                                                                                                                                                                                 |
| GAM06306 | neutral amino acid transporter B(0)-like                  | 2.7         | 9.7E+00                | 1.4E+00                | 1.2E-12 | 8.4E-10 | K11103                  | two-component system                                                                                                                                                                                                              |
| GAM06750 | REDY-like protein HapK                                    | 1.9         | 7.5E+00                | 9.3E-01                | 1.4E-04 | 2.3E-02 | -                       | -                                                                                                                                                                                                                                 |

**b** Upregulated genes in response to MPPHV

| Gene ID  | Putative function                                                   | Fold change | a.value | m.value | p.value | q.value | KO entry | KEGG pathway or Definition                                                                 |
|----------|---------------------------------------------------------------------|-------------|---------|---------|---------|---------|----------|--------------------------------------------------------------------------------------------|
| GAM03020 | hypothetical protein                                                | 2.1         | 9.3E+00 | 1.1E+00 | 1.1E-06 | 2.1E-04 | -        | -                                                                                          |
| GAM03021 | outer membrane protein                                              | 2.9         | 1.3E+01 | 1.5E+00 | 6.3E-14 | 3.3E-11 | K18139   | β-lactam resistance                                                                        |
| GAM03022 | hydrophobe/amphiphile efflux-1 (HAE1) family transporter            | 3.1         | 1.4E+01 | 1.6E+00 | 2.9E-15 | 4.4E-12 | K03296   | hydrophobic/amphiphilic exporter-1 (mainly G-bacteria), HAE1 family                        |
| GAM03023 | membrane fusion protein                                             | 3.1         | 1.2E+01 | 1.6E+00 | 3.9E-15 | 4.4E-12 | K03585   | β-lactam resistance                                                                        |
| GAM03024 | TetR family transcriptional regulator                               | 2.1         | 1.0E+01 | 1.1E+00 | 3.7E-07 | 7.5E-05 | -        | -                                                                                          |
| GAM03347 | 50S ribosomal protein L34                                           | 3.0         | 1.2E+01 | 1.6E+00 | 1.9E-14 | 1.3E-11 | -        | -                                                                                          |
| GAM03412 | flagellar FliL protein                                              | 2.0         | 6.9E+00 | 9.7E-01 | 5.3E-04 | 4.1E-02 | -        | flagellar FliL protein                                                                     |
| GAM03455 | hypothetical protein                                                | 2.3         | 6.7E+00 | 1.2E+00 | 2.8E-05 | 3.8E-03 | -        | -                                                                                          |
| GAM03551 | hypothetical protein                                                | 4.6         | 4.1E+00 | 2.2E+00 | 5.2E-05 | 6.1E-03 | -        | -                                                                                          |
| GAM03663 | RND efflux system                                                   | 3.2         | 6.9E+00 | 1.7E+00 | 3.6E-09 | 1.3E-06 | K18139   | β-lactam resistance                                                                        |
| GAM03664 | RND superfamily multidrug efflux pump acriflavin resistance protein | 2.4         | 8.4E+00 | 1.3E+00 | 5.4E-08 | 1.3E-05 | K18138   | β-lactam resistance                                                                        |
| GAM03665 | multidrug resistance protein MexA                                   | 2.8         | 7.1E+00 | 1.5E+00 | 4.1E-08 | 1.1E-05 | K03585   | β-lactam resistance                                                                        |
| GAM03825 | hypothetical protein                                                | 2.7         | 9.1E+00 | 1.4E+00 | 2.0E-10 | 9.2E-08 | -        | -                                                                                          |
| GAM04021 | hypothetical conserved protein                                      | 4.9         | 5.2E+00 | 2.3E+00 | 2.8E-08 | 7.7E-06 | -        | -                                                                                          |
| GAM04288 | Rieske (2Fe-2S) domain-containing protein                           | 1.8         | 7.6E+00 | 8.6E-01 | 5.9E-04 | 4.2E-02 | -        | -                                                                                          |
| GAM04293 | acyl-CoA dehydrogenase 6-like                                       | 2.4         | 5.9E+00 | 1.3E+00 | 1.5E-04 | 1.5E-02 | K00257   | geraniol degradation                                                                       |
| GAM04295 | acyl-CoA dehydrogenase                                              | 2.3         | 5.8E+00 | 1.2E+00 | 5.6E-04 | 4.2E-02 | K00257   | geraniol degradation                                                                       |
| GAM04307 | hypothetical protein                                                | 8.9         | 7.7E+00 | 3.2E+00 | 7.4E-33 | 3.5E-29 | -        | -                                                                                          |
| GAM04315 | Transcriptional regulator kdgR                                      | 2.0         | 8.5E+00 | 1.0E+00 | 6.7E-06 | 1.1E-03 | -        | -                                                                                          |
| GAM04323 | acyl-CoA dehydrogenase                                              | 1.8         | 8.4E+00 | 8.2E-01 | 3.6E-04 | 2.9E-02 | -        | -                                                                                          |
| GAM04591 | membrane protein                                                    | 1.8         | 1.1E+01 | 8.8E-01 | 1.8E-05 | 2.6E-03 | K08973   | putative membrane protein                                                                  |
| GAM04844 | hypothetical conserved protein                                      | 2.0         | 7.0E+00 | 9.9E-01 | 3.4E-04 | 2.8E-02 | -        | -                                                                                          |
| GAM04943 | aldehyde dehydrogenase                                              | 3.5         | 8.8E+00 | 1.8E+00 | 4.7E-15 | 4.4E-12 | K00138   | glycolysis-gluconeogenesis/pyruvate metabolism                                             |
| GAM04949 | two component LuxR family transcriptional regulator                 | 2.2         | 7.3E+00 | 1.2E+00 | 1.1E-05 | 1.6E-03 | -        | -                                                                                          |
| GAM04950 | pyrrolo-quinoline quinone                                           | 2.9         | 8.1E+00 | 1.5E+00 | 2.3E-10 | 9.7E-08 | K00114   | glycolysis-gluconeogenesis/chloroalkane and chloroalkene degradation/propanoate metabolism |

|          |                                                            |     |         |         |         |         |        |                                                                           |  |
|----------|------------------------------------------------------------|-----|---------|---------|---------|---------|--------|---------------------------------------------------------------------------|--|
| GAM04951 | extracellular solute-binding protein                       | 2.4 | 6.7E+00 | 1.3E+00 | 7.4E-06 | 1.2E-03 | -      | -                                                                         |  |
| GAM04952 | cytochrome C550                                            | 3.2 | 6.6E+00 | 1.7E+00 | 1.5E-08 | 4.6E-06 | -      | -                                                                         |  |
| GAM05027 | FAD dependent oxidoreductase                               | 2.3 | 8.4E+00 | 1.2E+00 | 3.2E-07 | 6.9E-05 | K00111 | glycerophospholipid metabolism                                            |  |
| GAM05028 | major facilitator superfamily glycerol uptake transporter  | 2.3 | 8.3E+00 | 1.2E+00 | 2.0E-07 | 4.5E-05 | K02440 | glycerol uptake facilitator protein                                       |  |
| GAM05029 | hypothetical protein                                       | 1.8 | 8.1E+00 | 8.8E-01 | 2.0E-04 | 1.9E-02 | -      | -                                                                         |  |
| GAM05030 | glycerol kinase                                            | 1.9 | 8.9E+00 | 9.4E-01 | 2.5E-05 | 3.4E-03 | K00864 | glycerolipid metabolism/PPAR signaling pathway/plant-pathogen interaction |  |
| GAM05489 | hypothetical conserved protein                             | 2.0 | 7.6E+00 | 1.0E+00 | 6.3E-05 | 7.0E-03 | -      | -                                                                         |  |
| GAM05496 | hypothetical conserved protein                             | 2.0 | 6.5E+00 | 1.0E+00 | 5.9E-04 | 4.2E-02 | -      | -                                                                         |  |
| GAM05498 | hypothetical conserved protein                             | 2.4 | 6.1E+00 | 1.3E+00 | 6.5E-05 | 7.1E-03 | -      | -                                                                         |  |
| GAM05503 | carotenoid oxygenase                                       | 1.7 | 9.6E+00 | 7.5E-01 | 4.7E-04 | 3.7E-02 | -      | -                                                                         |  |
| GAM05551 | hypothetical protein                                       | 1.7 | 8.6E+00 | 7.8E-01 | 5.5E-04 | 4.2E-02 | -      | -                                                                         |  |
| GAM05659 | hypothetical protein                                       | 4.1 | 7.4E+00 | 2.1E+00 | 1.3E-14 | 1.0E-11 | -      | -                                                                         |  |
| GAM05660 | multidrug resistance efflux pump                           | 2.5 | 1.0E+01 | 1.3E+00 | 4.7E-10 | 1.8E-07 | K03543 | multidrug resistance protein A                                            |  |
| GAM05661 | EmrB/QacA family drug resistance transporter               | 3.5 | 9.8E+00 | 1.8E+00 | 9.8E-17 | 2.3E-13 | K03446 | MFS transporter, DHA2 family, multidrug resistance protein B              |  |
| GAM05662 | outer membrane protein                                     | 3.1 | 9.9E+00 | 1.6E+00 | 2.2E-14 | 1.3E-11 | -      | -                                                                         |  |
| GAM05838 | TetR family transcriptional regulator                      | 1.8 | 9.9E+00 | 8.5E-01 | 5.4E-05 | 6.2E-03 | -      | -                                                                         |  |
| GAM05839 | RND efflux system outer membrane lipoprotein               | 1.7 | 1.1E+01 | 7.7E-01 | 1.8E-04 | 1.7E-02 | -      | -                                                                         |  |
| GAM05841 | MFS transporter DHA2 family multidrug resistance protein B | 1.8 | 1.1E+01 | 8.5E-01 | 3.7E-05 | 4.6E-03 | K03446 | MFS transporter, DHA2 family, multidrug resistance protein B              |  |
| GAM05995 | hypothetical conserved protein                             | 2.2 | 6.9E+00 | 1.2E+00 | 3.7E-05 | 4.6E-03 | -      | -                                                                         |  |
| GAM06021 | 50S ribosomal protein L36                                  | 1.9 | 1.1E+01 | 9.2E-01 | 7.5E-06 | 1.2E-03 | K02919 | ribosome                                                                  |  |
| GAM06195 | Flp/Fap pilin component family protein                     | 1.6 | 1.3E+01 | 7.1E-01 | 4.4E-04 | 3.6E-02 | -      | -                                                                         |  |
| GAM06305 | hypothetical conserved protein                             | 2.0 | 8.6E+00 | 1.0E+00 | 5.6E-06 | 9.7E-04 | -      | -                                                                         |  |
| GAM06306 | neutral amino acid transporter B(0)-like                   | 2.1 | 9.5E+00 | 1.1E+00 | 5.1E-07 | 1.0E-04 | K11103 | two-component system                                                      |  |
| GAM07274 | hypothetical conserved protein                             | 1.7 | 1.3E+01 | 7.3E-01 | 2.7E-04 | 2.4E-02 | -      | -                                                                         |  |
| GAM07297 | hypothetical conserved protein                             | 1.9 | 8.5E+00 | 9.5E-01 | 3.4E-05 | 4.4E-03 | -      | -                                                                         |  |
| GAM07522 | macrolide-specific ABC-type efflux carrier                 | 1.8 | 8.5E+00 | 8.2E-01 | 3.3E-04 | 2.8E-02 | K05685 | ABC transporters                                                          |  |

**c** Downregulated genes in response to GGGE

| Gene ID  | Putative function                        | Fold change | a.value | m.value  | p.value | q.value | KO entry | KEGG pathway or Definition             |
|----------|------------------------------------------|-------------|---------|----------|---------|---------|----------|----------------------------------------|
| GAM03320 | 30S ribosomal protein S20                | 0.6         | 1.5E+01 | -8.2E-01 | 1.3E-05 | 2.8E-03 | K02968   | ribosome                               |
| GAM03671 | benzaldehyde dehydrogenase II            | 0.6         | 9.9E+00 | -8.5E-01 | 1.9E-05 | 4.0E-03 | K00128   | multiple pathways <sup>(5)</sup>       |
| GAM03672 | 4-nitrobenzyl alcohol dehydrogenase NtnD | 0.6         | 1.1E+01 | -8.6E-01 | 8.2E-06 | 2.1E-03 | K00119   | phosphonate and phosphinate metabolism |
| GAM03825 | hypothetical protein                     | 0.3         | 7.5E+00 | -1.8E+00 | 1.4E-13 | 1.7E-10 | -        | -                                      |
| GAM05610 | hypothetical conserved protein           | 0.4         | 8.0E+00 | -1.3E+00 | 1.1E-08 | 4.7E-06 | -        | -                                      |

**d** Downregulated genes in response to MPPV

| Gene ID  | Putative function                            | Fold change | a.value | m.value  | p.value | q.value | KO entry | KEGG pathway or Definition                                                  |
|----------|----------------------------------------------|-------------|---------|----------|---------|---------|----------|-----------------------------------------------------------------------------|
| GAM03046 | RND family efflux transporter MFP subunit    | 0.5         | 8.3E+00 | -1.1E+00 | 2.2E-06 | 3.9E-04 | K03585   | $\beta$ -lactam resistance                                                  |
| GAM03047 | acriflavin resistance protein                | 0.5         | 9.7E+00 | -9.3E-01 | 1.2E-05 | 1.8E-03 | K18307   | multidrug efflux pump                                                       |
| GAM03048 | RND efflux system outer membrane lipoprotein | 0.4         | 9.1E+00 | -1.2E+00 | 2.0E-08 | 5.9E-06 | -        | -                                                                           |
| GAM03180 | catalase/peroxidase HPI                      | 0.4         | 1.2E+01 | -1.2E+00 | 5.9E-09 | 2.0E-06 | K03782   | phenylalanine metabolism/tryptophan metabolism/phenylpropanoid biosynthesis |
| GAM03672 | 4-nitrobenzyl alcohol dehydrogenase NtnD     | 0.6         | 1.1E+01 | -8.1E-01 | 7.9E-05 | 8.4E-03 | K00119   | phosphonate and phosphinate metabolism                                      |
| GAM04427 | cb-type cytochrome c oxidase subunit III     | 0.6         | 1.0E+01 | -7.6E-01 | 2.8E-04 | 2.4E-02 | K00406   | oxidative phosphorylation/two-component system                              |
| GAM04428 | cb-type cytochrome c oxidase subunit IV      | 0.5         | 7.8E+00 | -9.5E-01 | 1.0E-04 | 1.1E-02 | K00407   | oxidative phosphorylation/two-component system                              |
| GAM04429 | cb-type cytochrome c oxidase subunit II      | 0.6         | 1.0E+01 | -7.9E-01 | 1.4E-04 | 1.5E-02 | K00405   | oxidative phosphorylation/two-component system                              |
| GAM04430 | cb-type cytochrome c oxidase subunit I       | 0.6         | 1.2E+01 | -6.9E-01 | 5.9E-04 | 4.2E-02 | K00404   | oxidative phosphorylation/two-component system                              |
| GAM04896 | membrane protein                             | 0.4         | 8.6E+00 | -1.2E+00 | 1.9E-07 | 4.5E-05 | -        | -                                                                           |
| GAM05017 | ornithine cyclodeaminase                     | 0.5         | 7.8E+00 | -9.2E-01 | 1.6E-04 | 1.6E-02 | K01750   | arginine and proline metabolism/biosynthesis of amino acids                 |
| GAM05051 | phage shock protein A, PspA                  | 0.6         | 9.7E+00 | -7.7E-01 | 2.6E-04 | 2.4E-02 | K03969   | phage shock protein A                                                       |
| GAM05090 | hypothetical protein                         | 0.5         | 8.2E+00 | -8.7E-01 | 2.3E-04 | 2.1E-02 | -        | -                                                                           |
| GAM05231 | hypothetical protein                         | 0.5         | 6.2E+00 | -1.1E+00 | 5.1E-04 | 4.0E-02 | -        | -                                                                           |
| GAM05679 | hypothetical protein                         | 0.5         | 8.4E+00 | -9.4E-01 | 4.7E-05 | 5.7E-03 | -        | -                                                                           |

<sup>(1)(2)</sup> The a- and m-values were calculated as follows:

$$a\text{-value} = 1/2\log_2(G1G2) = \log_2(G1) + \log_2(G2)$$

$$m\text{-value} = \log_2(G2/G1) = \log_2(G2) - \log_2(G1)$$

G1: gene expression level in the control condition

G2: gene expression level in response to GGGE or MPPV

Genes differentially expressed in response specifically to GGGE or MPPV are highlighted in gray.

<sup>(3)</sup> KO entries are the defined ortholog groups categorized under the hierarchy of KEGG pathways and BRITE ontologies in Kyoto Encyclopedia of Genes and Genomes Databases (KEGG) (<http://www.genome.jp/kegg/>).

<sup>(4)</sup> Not defined due to the low nucleotide sequence similarity to the KO entries

<sup>(5)</sup> KEGG pathways involving K00128

|                                            |                                 |                                           |
|--------------------------------------------|---------------------------------|-------------------------------------------|
| glycolysis / gluconeogenesis               | lysine degradation              | glycerolipid metabolism                   |
| pentose and glucuronate interconversions   | arginine and proline metabolism | pyruvate metabolism                       |
| ascorbate and aldarate metabolism          | histidine metabolism            | chloroalkane and chloroalkene degradation |
| fatty acid degradation                     | tryptophan metabolism           | propanoate metabolism                     |
| valine, leucine and isoleucine degradation | $\beta$ -alanine metabolism     | limonene and pinene degradation           |

**Table S7.** Primers used for qRT-PCR

| Target   | Primer name | Sequence               | Amplicon size (bp) |
|----------|-------------|------------------------|--------------------|
| GAM05523 | g0069_fw    | GCGCATCTCAAGAACGTG     | 132                |
|          | g0069_rv    | GATGTCTTCCAGCGGCTT     |                    |
| GAM05529 | g0075_fw    | GACGCGAACTACACGTTG     | 114                |
|          | g0075_rv    | GACCTCATGGTCGATCAGTG   |                    |
| GAM05530 | g0075_fw    | AGGTTCTGGACGAGGAAATG   | 125                |
|          | g0075_rv    | GATGGCGAAGTTGCAGATG    |                    |
| GAM05531 | g0077_fw    | CCGAATACCTCGATGAGACT   | 156                |
|          | g0077_rv    | GCAACGACAGATCATGGTAG   |                    |
| GAM05532 | g0078_fw    | GCTATC GCATGATCCTGAAC  | 135                |
|          | g0078_rv    | CGAAACGGTCGAACAGGTA    |                    |
| GAM05547 | g0093_fw    | GTTTCTTCCACCTCTACCAGAC | 89                 |
|          | g0093_rv    | GTGGGTGAGGATGTAGAGTTC  |                    |
| 16SrDNA  | 16Sr_fw     | TGGGCACTCTAAGGAAACTG   | 109                |
|          | 16Sr_rv     | GTCACCGCCATTGTAGCA     |                    |



#### IV. Supplementary references

1. Addison, S.L., Foote, S.M., Reid, N.M., & Lloyd-Jones, G. *Novosphingobium nitrogenifigens* sp. nov., a polyhydroxyalkanoate-accumulating diazotroph isolated from a New Zealand pulp and paper wastewater. *Int. J. Syst. Evol. Microbiol.* **57**, 2467-2471 (2007).
2. Adriaenssens, E.M., Guerrero, L.D., Makhalanyane, T.P., Aislabie, J.M. & Cowan, D.A. Draft genome sequence of the aromatic hydrocarbon-degrading bacterium *Sphingobium* sp. strain Ant17, isolated from Antarctic soil. *Genome Announc.* **2**, e00212-14 (2014).
3. Anand, S., *et al.* Genome sequence of *Sphingobium indicum* B90A, a hexachlorocyclohexane-degrading bacterium. *J. Bacteriol.* **194**, 4471-4472 (2012).
4. Asker, D., Beppu, T. & Ueda, K. *Sphingomonas jaspsi* sp. nov., a novel carotenoid-producing bacterium isolated from Misasa, Tottori, Japan. *Int. J. Syst. Evol. Microbiol.* **57**, 1435-1441 (2007).
5. Aylward, F.O., *et al.* Comparison of 26 Sphingomonad genomes reveals diverse environmental adaptations and biodegradative capabilities. *Appl. Environ. Microbiol.* **79**, 3724-3733 (2013).
6. Brown, S.D., *et al.* Twenty-one genome sequences from *Pseudomonas* species and 19 genome sequences from diverse bacteria isolated from the rhizosphere and endosphere of *Populus deltoides*. *J. Bacteriol.* **194**, 5991-5993 (2012).
7. Buonauro, R., *et al.* *Sphingomonas melonis* sp nov., a novel pathogen that causes brown spots on yellow Spanish melon fruits. *Int. J. Syst. Evol. Microbiol.* **52**, 2081-2087 (2002).
8. Chen, Y., *et al.* Kraft lignin biodegradation by *Novosphingobium* sp B-7 and analysis of the degradation process. *Bioresour. Technol.* **123**, 682-685 (2012).
9. Copley, S.D., *et al.* The whole genome sequence of *Sphingobium chlorophenolicum* L-1:

- Insights into the evolution of the pentachlorophenol degradation pathway. *Genome Biol. Evol.* **4**, 184-198 (2012).
10. Cua, L.S. & Stein, L.Y. Characterization of denitrifying activity by the alphaproteobacterium, *Sphingomonas wittichii* RW1. *Front Microbiol.* **5**, 404-404 (2014).
  11. D'Argenio, V., *et al.* De Novo sequencing and assembly of the whole genome of *Novosphingobium* sp. strain PP1Y. *J. Bacteriol.* **193**, 4296-4296 (2011).
  12. Desiniotis, A., *et al.* Complete genome sequence of the ethanol-producing *Zymomonas mobilis* subsp *mobilis* centrotypic ATCC 29191. *J. Bacteriol.* **194**, 5966-5967 (2012).
  13. Dong, C., *et al.* Draft genome sequence of *Sphingobium* sp. strain C100, a polycyclic aromatic hydrocarbon-degrading bacterium from the deep-sea sediment of the Arctic ocean. *Genome Announc.* **2**, e01210-13 (2014).
  14. Eugenia-Farias, M., *et al.* Genome sequence of *Sphingomonas* sp. S17, isolated from an alkaline, hyperarsenic, and hypersaline volcano-associated lake at high altitude in the Argentinean puna. *J. Bacteriol.* **193**, 3686-3687 (2011).
  15. Fida, T.T., Moreno-Forero, S.K., Heipieper, H.J. & Springael, D. Physiology and transcriptome of the polycyclic aromatic hydrocarbon-degrading *Sphingomonas* sp. LH128 after long-term starvation. *Microbiology.* **159**, 1807-1817 (2013).
  16. Fredrickson, J.K., Brockman, F.J., Workman, D.J., Li, S.W. & Stevens, T.O. Isolation and characterization of a subsurface bacterium capable of growth on toluene, naphthalene, and other aromatic compounds. *Appl. Environ. Microbiol.* **57**, 796-803 (1991)
  17. Gai, Z., *et al.* Genome sequence of *Sphingobium yanoikuyae* XLDN2-5, an efficient carbazole-degrading strain. *J. Bacteriol.* **193**, 6404-6405 (2011).
  18. Gai, Z., *et al.* Genome sequence of *Sphingomonas elodea* ATCC 31461, a highly productive industrial strain of gellan gum. *J. Bacteriol.* **193**, 7015-7016 (2011).
  19. Gan, H.M., Buckley, L., Szegedi, E., Hudson, A.O. & Savka, M.A. Identification of an *rsh*

- gene from a *Novosphingobium* sp. necessary for quorum-sensing signal accumulation. *J. Bacteriol.* **191**, 2551-2560 (2009).
20. Gan, H.M., Chew, T.H., Hudson, A.O. & Savka, M.A. Genome Sequence of *Novosphingobium* sp. strain Rr 2-17, a Nopaline crown gall-associated bacterium isolated from *Vitis vinifera* L. Grapevine. *J. Bacteriol.* **194**, 5137-5138 (2012).
  21. Gan, H.Y., *et al.* Whole-genome sequences of 13 endophytic bacteria isolated from shrub willow (*salix*) grown in geneva, new york. *Genome Announc* **2**, e00288-14 (2014).
  22. Gich, F. & Overmann, J. *Sandarakinorhabdus limnophila* gen. nov., sp nov., a novel bacteriochlorophyll a-containing, obligately aerobic bacterium isolated from freshwater lakes. *Int. J. Syst. Evol. Microbiol.* **56**, 847-854 (2006).
  23. Glaeser, S.P., Kaempfer, P., Busse, H.J., Langer, S. & Glaeser, J. *Novosphingobium acidiphilum* sp. nov., an acidophilic salt-sensitive bacterium isolated from the humic acid-rich Lake Grosse Fuchskuhle. *Int. J. Syst. Evol. Microbiol.* **59**, 323-330 (2009).
  24. Herman, R.A., Phillips, A.M., Lepping, M.D., Fast, B.J. & Sabbatini, J. Compositional safety of event DAS-40278-9 (AAD-1) herbicide-tolerant maize. *GM crops.* **1**, 294-311(2010).
  25. Hoffmann, J., Bona-Lovasz, J., Beuttler, H. & Altenbuchner, J. *In vivo* and *in vitro* studies on the carotenoid cleavage oxygenases from *Sphingopyxis alaskensis* RB2256 and *Plesiocystis pacifica* SIR-1 revealed their substrate specificities and non-retinal-forming cleavage activities. *FEBS J.* **279**, 3911-3924 (2012).
  26. Hu, A.Y., He, J.B. Chu, K.H. & Yu, C.P. Genome sequence of the 17 $\beta$ -estradiol-utilizing bacterium *Sphingomonas* strain KC8. *J. Bacteriol.* **193**, 4266-4267 (2011).
  27. Hu, A., Lv, M. & Yu, C.P. Draft genome sequence of the bisphenol A-degrading bacterium *Sphingobium* sp. strain YL23. *Genome Announc.* **1**, e00549-13 (2013).
  28. Huang HD, *et al.* *Sphingomonas sanxanigenens* sp. nov., isolated from soil. *Int. J. Syst.*

- Evol. Microbiol.* **59**, 719-723 (2009).
29. Innerebner, G., Knief, C. & Vorholt J. Protection of *Arabidopsis thaliana* against leaf-pathogenic *Pseudomonas syringae* by *Sphingomonas* strains in a controlled model system. *Appl. Environ. Microbiol.* **77**, 3202-3210 (2011).
  30. Jiao, N.Z., Zhang, R. & Zheng, Q. Coexistence of two different photosynthetic operons in *Citromicrobium bathyomarinum* JL354 as revealed by whole-genome sequencing. *J. Bacteriol.* **192**, 1169-1170 (2010).
  31. Kaur, J., Verma, H., Tripathi, C., Khurana, J.P. & Lal, R. Draft genome sequence of a hexachlorocyclohexane-degrading bacterium, *Sphingobium baderi* strain LL03<sup>T</sup>. *Genome Announc.* **1**, e00751-13 (2013).
  32. Kohli, P., *et al.* Draft genome sequence of *Sphingobium ummariense* strain RL-3, a hexachlorocyclohexane-degrading bacterium. *Genome Announc.* **1**, e00956-13 (2013).
  33. Kouveli, V.N., *et al.* Genome sequence of the ethanol-producing *Zymomonas mobilis* subsp. *pomaceae* lectotype strain ATCC 29192. *J. Bacteriol.* **193**, 5049-5050 (2011).
  34. Kouvelis, V.N., *et al.* Complete genome sequence of the ethanol producer *Zymomonas mobilis* NCIMB 11163. *J. Bacteriol.* **191**, 7140-7141 (2009).
  35. Kouvelis, V.N., *et al.* Finished genome of *Zymomonas mobilis* subsp. *mobilis* strain CP4, an applied ethanol producer. *Genome Announc.* **2**, e00845-13 (2014).
  36. Kumar, S.A., *et al.* Draft genome sequence of *Sphingobium quisquiliarum* strain P25<sup>T</sup>, a novel hexachlorocyclohexane (HCH)-degrading bacterium Isolated from an HCH dumpsite. *Genome Announc.* **1**, e00717-13 (2013).
  37. Kumar, R., Dwivedi, V., Negi, V., Khurana, J.P. & Lal, R. Draft genome sequence of *Sphingobium lactosutens* strain DS20<sup>T</sup>, isolated from a hexachlorocyclohexane dumpsite. *Genome Announc.* **1**, (2013).
  38. Kunihiro, M., Ozeki, Y., Nogi, Y., Hamamura, N. & Kanaly, R.A. Benz[*a*]anthracene

- biotransformation and production of ring fission products by *Sphingobium* sp. strain KK22. *Appl. Environ. Microbiol.* **79**, 4410-4420 (2013).
39. Lal, R., *et al.* Biochemistry of microbial degradation of hexachlorocyclohexane and prospects for bioremediation. *Microbiol. Mol. Biol. Rev.* **74**, 58-80(2010).
  40. Lee, H., *et al.* Genome sequence of *Sphingomonas* sp. strain PAMC 26621, an Arctic-lichen-associated bacterium isolated from a *Cetraria* sp. *J. Bacteriol.* **194**, 3030-3030 (2012).
  41. Lee, J., *et al.* Draft genome sequence of a *Sphingomonas* sp., an endosymbiotic bacterium isolated from an Arctic lichen *Umbilicaria* sp. *J. Bacteriol.* **194**, 3010-3011 (2012).
  42. Lima, A.R.J., *et al.* Draft genome sequence of *Blastomonas* sp. strain CACIA 14H2, a heterotrophic bacterium associated with Cyanobacteria. *Genome Announc.* **2**, e01200-13 (2014).
  43. Lyu, Y., Zheng, W., Zheng, T. & Tian, Y. Biodegradation of polycyclic aromatic hydrocarbons by *Novosphingobium pentaromativorans* US6-1. *Plos One.* **9**, e101438 (2014).
  44. Ma Z, *et al.* Genome sequence of *Sphingomonas wittichii* DP58, the first reported phenazine-1-carboxylic acid-degrading strain. *J. Bacteriol.* **194**, 3535-3536 (2012).
  45. Masai, E., Katayama, Y. & Fukuda, M. Genetic and biochemical investigations on bacterial catabolic pathways for lignin-derived aromatic compounds. *Biosci. Biotechnol. Biochem.* **71**, 1-15 (2007).
  46. Mukherjee, U., Kumar, R., Mahato, N.K., Khurana, J.P. & Lal, R. Draft genome sequence of *Sphingobium* sp. strain HDIPO4, an avid degrader of hexachlorocyclohexane. *Genome Announc.* **1**, e00749-13 (2013).
  47. Nagata, Y., *et al.* Complete genome sequence of the representative  $\gamma$ -hexachlorocyclohexane-degrading bacterium *Sphingobium japonicum* UT26. *J. Bacteriol.*

- 192, 5852-5853 (2010).
48. Nandy, S., Dudeja, M., Das, A.K. & Tiwari, R. Community acquired bacteremia by *Sphingomonas paucimobilis*: two rare case reports. *J. Clin. Diagn. Res*, **7**, 2947-2949 (2013).
  49. Negi, V., *et al.* Draft genome sequence of hexachlorohexane (HCH)-degrading *Sphingobium lucknowense* strain F2<sup>T</sup>, isolated from an HCH dumpsite. *Genome Announc.* **2**, e00788-14 (2014).
  50. Niharika, N., *et al.* Draft genome sequence of *Sphingobium chinhatense* strain IP26<sup>T</sup>, isolated from a Hexachlorocyclohexane dumpsite. *Genome Announc.* **1**, e00680-13 (2013).
  51. Pal, R., Bhasin, V.K. & Lal, R. Proposal to reclassify *Sphingomonas xenophaga* Stolz *et al.* 2000 and *Sphingomonas taejonensis* Lee *et al.* 2001 as *Sphingobium xenophagum* comb. nov and *Sphingopyxis taejonensis* comb. nov., respectively. *Int. J. Syst. Evol. Microbiol.* **56**, 667-670 (2006).
  52. Pappas, K.M., *et al.* Genome sequence of the ethanol-producing *Zymomonas mobilis* subsp. *mobilis* lectotype strain ATCC 10988. *J. Bacteriol.* **193**, 5051-5052 (2011).
  53. Qu, Y., *et al.* Genome sequence of *Sphingomonas xenophaga* QYY, an anthraquinone-degrading strain. *Genome Announc.* **1**, e00031-12 (2013).
  54. Rivas, R., Abril, A., Trujillo, M.E. & Velazquez, E. *Sphingomonas phyllosphaerae* sp. nov., from the phyllosphere of *Acacia caven* in Argentina. *Int. J. Syst. Evol. Microbiol.* **54**, 2147-2150 (2004).
  55. Romine, M.F., *et al.* Complete sequence of a 184-kilobase catabolic plasmid from *Sphingomonas aromaticivorans* F199. *J. Bacteriol.* **181**, 1585-1602 (1999).
  56. Saxena, A., *et al.* Genome sequence of *Novosphingobium lindaniclasticum* LE124<sup>T</sup>, isolated from a hexachlorocyclohexane dumpsite. *Genome Announc.* **1**, e00715-13 (2013).
  57. Seo, J.S., *et al.* (2005) The genome sequence of the ethanologenic bacterium *Zymomonas*

- mobilis* ZM4. *Nat. Biotechnol.* **23**, 63-68.
58. Shin, S.C., *et al.* Genome sequence of *Sphingomonas* sp. strain PAMC 26605, isolated from Arctic lichen (*Ochrolechia* sp.). *J. Bacteriol.* **194**, 1607-1607 (2012).
59. Shin, S.C., Kim, S.J., Ahn, D.H., Lee, J.K. & Park, H. Draft genome sequence of *Sphingomonas echinoides* ATCC 14820. *J. Bacteriol.* **194**, 1843-1843 (2012).
60. Tabata, M., Ohtsubo, Y., Ohhata, S., Tsuda, M. & Nagata, Y. Complete genome sequence of the  $\gamma$ -Hexachlorocyclohexane-degrading bacterium *Sphingomonas* sp. strain MM-1. *Genome Announc* **1**, e00247-13 (2013).
61. Videira, P.A., Cortes, L.L., Fialho, A.M. & Sa-Correia, I. Identification of the *pgmG* gene, encoding a bifunctional protein with phosphoglucomutase and phosphomannomutase activities, in the gellan gum-producing strain *Sphingomonas paucimobilis* ATCC 31461. *Appl. Environ. Microbiol.* **66**, 2252-2258 (2000).
62. Wang, X., Tao, F., Gai, Z., Tang, H. & Xu, P. Genome sequence of the welan gum-producing strain *Sphingomonas* sp. ATCC 31555. *J. Bacteriol.* **194**, 5989-5990 (2012).
63. Xue, C., *et al.* Draft genome sequence of *Sphingobium* sp. strain BHC-A, revealing genes for the degradation of hexachlorocyclohexane. *Genome Announc.* **2**, e00254-14 (2014).
64. Yabuuchi, E., *et al.* *Sphingomonas paucimobilis* gen. nov. and comb. nov., *Sphingomonas parapaucimobilis* sp. nov., *Sphingomonas yanoikuyae* sp. nov., *Sphingomonas adhaesiva* sp. nov., *Sphingomonas capsulata* comb. nov., and two genospecies of the genus *Sphingomonas*. *Microbiology and Immunology.* **34**, 99-119 (1990).
65. Yoon, J.H., Lee, C.H., Yeo, S.H. & Oh, T.K. *Sphingopyxis baekryungensis* sp nov., an orange-pigmented bacterium isolated from sea water of the Yellow Sea in Korea. *Int. J. Syst. Evol. Microbiol.* **55**, 1223-1227 (2005).
66. Zeng, Y., Feng, F., Liu, Y., Li, Y. & Koblížek, M. Genome sequences and photosynthesis

- gene cluster composition of a freshwater aerobic anoxygenic phototroph,  
*Sandarakinorhabdus* sp. strain AAP62, isolated from the Shahu Lake in Ningxia, China.  
*Genome Announc.* **1**, e00034-13 (2013)
67. Zeng Y, *et al.* Whole-genome sequences of an aerobic anoxygenic phototroph,  
*Blastomonas* sp. strain AAP53, isolated from a freshwater desert lake in Inner Mongolia,  
China. *Genome Announc.* **1**, e0007113 (2013).
68. Zhao, N., Bai, Y., Zhao, X.Q., Yang, Z.Y. & Bai, F.W. Draft genome sequence of the  
flocculating *Zymomonas mobilis* strain ZM401 (ATCC 31822). *J. Bacteriol.* **194**,  
7008-7009 (2012).
69. Zheng, Q., Zhang, R. & Jiao, N. Genome sequence of *Citromicrobium* strain JLT1363,  
isolated from the South China Sea. *J. Bacteriol.* **193**, 2074-2075(2011).
70. Zipper, C., Nickel, K., Angst, W. & Kohler, H.P.E. Complete microbial degradation of  
both enantiomers of the chiral herbicide mecoprop  
(RS)-2-(4-chloro-2-methylphenoxy)propionic acid in an enantioselective manner by  
*Sphingomonas herbicidovorans* sp. nov. *Appl. Environ. Microbiol.* **62**, 4318-4322 (1996)
